# Supplementary material for: Synthesis of spiroindolenine-bearing chroman scaffolds based on a cyclization reaction of para-Quinone methides
Source: Royal Society of Chemistry journal article supplement (doi:10.1039/d2nj00936f), 2022-01-01

## *Supporting Information for*

### **Synthesis of Spiroindolenine Bearing Chroman Scaffolds Based on Cyclization Reaction to *para*-Methylated Methides**

Hongmei Qin,<sup>a</sup> Qimei Xie,<sup>b</sup> Long He<sup>\*a,b</sup>

- a. College of Chemistry and Materials Engineering, Guiyang University, Guiyang, 550005, P. R. China.
- b. College of Chemistry and Chemical Engineering, China West Normal University, Nanchong, 637009, P. R. China.

E-mail: longhe@cwnu.edu.cn

### **Table of Contents**

|                                                       |         |
|-------------------------------------------------------|---------|
| 1. General information.....                           | S2      |
| 2. General procedure.....                             | S2      |
| 3. Spectra data for all the products <b>3-4</b> ..... | S3-S15  |
| 4. NMR spectra for compounds <b>3-4</b> .....         | S16-S47 |

## Experimental Section

### General Information:

Unless otherwise noted, all the reagents were obtained from commercial supplier and used without further purification. Solvents used in the reactions were distilled from appropriate drying agents prior to use.  $^1\text{H}$  NMR spectra and  $^{13}\text{C}$  NMR spectra were recorded in  $\text{CDCl}_3$  on a spectrometer operating at 400 and 100 MHz, respectively. Chemical shifts are reported in parts per million relative to the appropriate standard: TMS for  $^1\text{H}$  and  $^{13}\text{C}$  NMR spectra. IR was recorded on the Nicolet 6700. High resolution mass spectra were obtained on Bruker Daltonics micrOTOF-Q II spect-rometer in ESI mode. Flash column chromatography was performed using 200-300 mesh silica gel. *ortho*-hydroxyphenyl-substituted *para*-quinone methides **1** with aryl sulfonyl indoles **2** used here are known compounds and prepared according to the reported procedure.<sup>[1,2]</sup>

### General procedure for the Oxa-Michael/1,6-Conjugated Addition Reaction:

To a solution of *ortho*-hydroxyphenyl-substituted *para*-quinone methides **1** (0.1 mmol) and aryl sulfonyl indoles **2** (0.12 mmol) in  $\text{CH}_3\text{CN}$  (2 mL) was added  $\text{Cs}_2\text{CO}_3$  (0.3 mmol). The reaction mixture was stirred under argon atmosphere at room temperature until the reaction completed (monitored by TLC), the reaction mixture was extracted with ethyl acetate ( $2 \times 10$  mL). The combined organic layers were washed twice by saturated sodium chloride solution and then dried over anhydrous  $\text{Na}_2\text{SO}_4$ . After the removal of solvent under the reduced pressure, the residue was purified through flash column chromatography on silica gel (petroleum ether: ethyl acetate = 10:1 - 6:1) to afford the desired cyclization products **3 or 4**.

## Spectra data for compounds 3-4

### 2,6-di-tert-butyl-4-(2'-methyl-2-phenylspiro[chromane-3,3'-indol]-4-yl)phenol (3a)

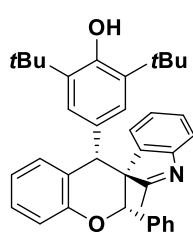

(3a), (petroleum ether/ethyl acetate = 10:1), 49.5 mg, yield: 94%, white solid, mp 199-200 °C, dr >19:1, **<sup>1</sup>H NMR (400 MHz, CDCl<sub>3</sub>):** δ (ppm) 7.37 (d, *J* = 7.45 Hz, 1H), 7.30-7.26 (m, 1H), 7.24-7.22 (m, 1H), 7.16-7.11 (m, 3H), 7.09-7.03 (m, 3H), 6.91-6.87 (m, 3H), 6.78 (d, *J* = 7.71 Hz, 1H), 5.97 (brs, 1H), 5.69 (s, 1H), 4.97 (s, 1H), 4.93 (s, 1H), 2.39 (s, 3H), 1.39 (s, 9H), 0.92 (s, 9H); **<sup>13</sup>C NMR (100 MHz, CDCl<sub>3</sub>):** δ (ppm) 179.7, 156.1, 155.0, 152.9, 130.1, 128.8, 128.4, 128.3, 127.7, 127.1, 126.9, 126.0, 124.9, 124.5, 121.2, 119.8, 116.3, 82.6, 65.1, 50.3, 34.0, 30.2, 17.8; **IR (KBr):** γ 3435, 2954, 1625, 1484, 1435, 1376, 1230, 1050, 875, 769, 702; **HRMS (ESI):** calcd for C<sub>37</sub>H<sub>39</sub>NO<sub>2</sub> [M+H]<sup>+</sup>: 530.3053, found: 530.3051.

### 2,6-di-tert-butyl-4-(2'-ethyl-2-phenylspiro[chromane-3,3'-indol]-4-yl)phenol (3b)

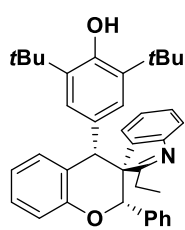

(petroleum ether/ethyl acetate= 10:1), 45.6 mg, yield: 84%, white solid, mp 200-201 °C, dr > 19:1, **<sup>1</sup>H NMR (400 MHz, CDCl<sub>3</sub>):** δ (ppm) 7.38 (d, *J* = 7.47Hz, 1H), 7.29-7.24 (m, 2H), 7.21-7.12 (m, 3H), 7.08-7.02 (m, 3H), 6.90-6.84 (m, 4H), 6.77 (d, *J* = 7.71 Hz, 1H), 5.95 (brs, 1H), 5.68 (s, 1H), 4.98 (s, 1H), 4.93 (s, 1H), 2.88-2.62 (m, 2H), 1.38 (s, 9H), 1.20-1.17 (m, 3H), 0.92 (s, 9H); **<sup>13</sup>C NMR (100 MHz, CDCl<sub>3</sub>):** δ (ppm) 183.9, 156.2, 155.0, 153.0, 136.5, 135.7, 130.1, 128.9, 128.4, 128.3, 127.8, 127.2, 127.1, 126.0, 124.8, 124.8, 121.1, 120.0, 116.3, 83.0, 65.0, 50.7, 34.0, 30.1, 24.1, 9.8; **IR (KBr):** γ 3434, 2955, 1622, 1453, 1384, 1231, 1058, 763, 763, 700, 603; **HRMS (ESI):** calcd for C<sub>38</sub>H<sub>41</sub>NO<sub>2</sub> [M+H]<sup>+</sup>:544.3210, found: 544.3214.

### 2,6-di-tert-butyl-4-(2,2'-diphenylspiro[chromane-3,3'-indol]-4-yl)phenol (3c)

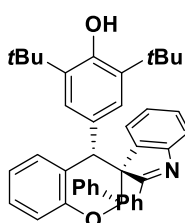

(petroleum ether/ethyl acetate= 10:1), 54.9 mg, yield: 93%, white solid, mp 218-219 °C, dr > 19:1, **<sup>1</sup>H NMR 600 MHz, CDCl<sub>3</sub>):** δ (ppm) 8.20 (d, *J* = 6.26 Hz, 2H), 7.57-7.52 (m, 2H), 7.47 (d, *J* = 7.45 Hz, 1H), 7.33-7.30 (m, 1H), 7.23 (d, *J* = 7.44 Hz, 1H), 7.20-7.14 (m, 3H), 7.02-6.99 (m, 1H), 6.93 (d, *J* = 4.32 Hz, 2H), 6.91-6.88 (m, 2H), 6.84 (d, *J* = 7.80 Hz, 2H), 6.39 (s, 1H), 6.28 (brs, 1H), 6.03 (brs, 1H), 5.42 (s, 1H), 4.83 (s, 1H), 1.04 (s, 9H), 0.94 (s, 9H); **<sup>13</sup>C NMR (150 MHz, CDCl<sub>3</sub>):** δ (ppm) 175.9, 155.4, 155.3, 152.6, 137.6, 135.7, 134.4, 130.5, 130.2, 128.8, 128.3, 128.3, 128.1,

127.3, 126.8, 126.6, 126.5, 125.2, 124.4, 121.3, 120.7, 116.7, 81.4, 66.6, 50.2, 33.8, 29.9; **IR (KBr)**:  $\gamma$  3436, 2955, 2921, 2860, 1630, 1443, 1385, 1234, 1114, 1027, 762, 700; **HRMS (ESI)**: calcd for  $C_{42}H_{41}NO_2$   $[M+H]^+$ : 592.3210, found: 592.3212.

**2,6-di-tert-butyl-4-(2-(2-chlorophenyl)-2'-methylspiro[chromane-3,3'-indol]-4-yl)**

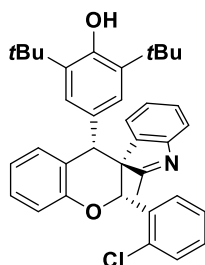

**phenol (3d)**, (petroleum ether/ethyl acetate= 10:1), 42.8 mg, yield: 76%, white solid, mp 223-224 °C, dr > 19:1, **<sup>1</sup>H NMR (400 MHz, CDCl<sub>3</sub>)**:  $\delta$  (ppm) 7.35-7.26 (m, 2H), 7.17-7.12 (m, 3H), 7.10-7.07 (m, 2H), 6.99-6.96 (m, 2H), 6.93-6.89 (m, 1H), 6.85-6.84 (m, 1H), 6.79-6.76 (m, 2H), 5.97 (brs, 1H), 5.65 (s, 1H), 4.98 (s, 1H), 4.91 (s, 1H), 2.39 (s, 3H), 1.39 (s, 9H), 0.92 (s, 9H); **<sup>13</sup>C NMR (100 MHz, CDCl<sub>3</sub>)**:  $\delta$  (ppm) 179.3, 156.0, 154.6, 153.0, 137.5, 135.9, 133.5, 130.1, 128.9, 128.6, 128.4, 127.2, 126.9, 125.9, 125.1, 125.0, 124.3, 121.4, 120.0, 116.3, 81.8, 65.1, 50.0, 34.0, 30.1, 17.7; **IR (KBr)**:  $\gamma$  3436, 2956, 1628, 1435, 1382, 1231, 1116, 1054, 860, 772, 701; **HRMS (ESI)**: calcd for  $C_{37}H_{38}ClNO_2$   $[M+H]^+$ : 564.2664, found: 564.2661.

**4-(2-(2-bromophenyl)-2'-methylspiro[chromane-3,3'-indol]-4-yl)-2,6-di-tert-butyl**

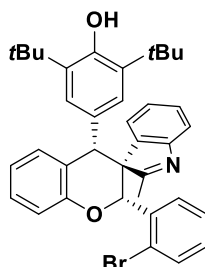

**phenol (3e)**, (petroleum ether/ethyl acetate= 7:1), 48 mg, yield: 79%, white solid, mp 210-211 °C, dr > 19:1, **<sup>1</sup>H NMR (600 MHz, CDCl<sub>3</sub>)**:  $\delta$  (ppm) 7.51-7.49 (m, 1H), 7.39 (d,  $J$  = 7.52 Hz, 1H), 7.32-7.26 (m, 2H), 7.21 (d,  $J$  = 7.62 Hz, 1H), 7.18-7.15 (m, 1H), 7.07- 6.98 (m, 3H), 6.92-6.89 (m, 1H), 6.84-6.79 (m, 2H), 6.36-6.32 (m, 2H), 5.95 (brs, 1H), 5.03 (s, 1H), 4.97 (s, 1H), 2.41 (s, 3H), 1.39 (s, 9H), 0.94 (s, 9H); **<sup>13</sup>C NMR (150 MHz, CDCl<sub>3</sub>)**:  $\delta$  (ppm) 180.4, 156.2, 155.5, 153.0, 136.8, 134.8, 132.9, 130.5, 130.4, 128.6, 128.3, 127.4, 126.8, 126.1, 125.1, 124.6, 124.1, 121.3, 120.0, 116.4, 80.4, 64.7, 51.7, 34.0, 30.2, 18.1; **IR (KBr)**:  $\gamma$  3433, 2953, 1622, 1436, 1380, 1230, 1115, 882, 764, 730; **HRMS (ESI)**: calcd for  $C_{37}H_{38}BrNO_2$   $[M+H]^+$ : 608.2159, found: 608.2156.

**2,6-di-tert-butyl-4-(2-(3-chlorophenyl)-2'-methylspiro[chromane-3,3'-indol]-4-yl)**

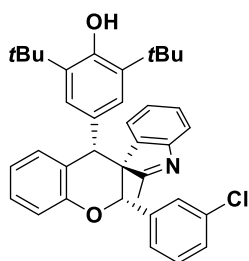

**phenol (3f)**, (petroleum ether/ethyl acetate= 8:1), 51 mg, yield: 91%, white solid, mp 226-227 °C, dr = 10:1,  $^1\text{H NMR}$  (400 MHz,  $\text{CDCl}_3$ ):  $\delta$  (ppm) 7.35-7.30 (m, 1H), 7.29-7.26 (m, 1H), 7.17-7.12 (m, 3H), 7.10-7.07 (m, 2H), 6.99-6.96 (m, 2H), 6.93-6.89 (m, 1H), 6.85-6.84 (m, 1H), 6.79-6.76 (m, 2H), 5.98 (brs, 1H), 5.65 (s, 1H), 4.98 (s, 1H), 4.91 (s, 1H), 2.39 (s, 3H), 1.39 (s, 9H), 0.92 (s, 9H);  $^{13}\text{C NMR}$  (100 MHz,  $\text{CDCl}_3$ ):  $\delta$  (ppm) 179.3, 156.0, 154.6, 153.0, 137.5, 130.1, 128.9, 128.6, 128.4, 127.2, 126.9, 125.9, 125.1, 125.0, 124.3, 121.4, 120.0, 116.3, 81.8, 65.1, 50.0, 34.0, 30.1, 17.7; **IR (KBr)**:  $\gamma$  3431, 2924, 2856, 1627, 1434, 1382, 1232, 1052, 772, 702; **HRMS (ESI)**: calcd for  $\text{C}_{37}\text{H}_{38}\text{ClNO}_2$   $[\text{M}+\text{H}]^+$ : 564.2664, found: 564.2667.

**4-(2-(3-bromophenyl)-2'-methylspiro[chromane-3,3'-indol]-4-yl)-2,6-di-tert-butylphenol (3g)**

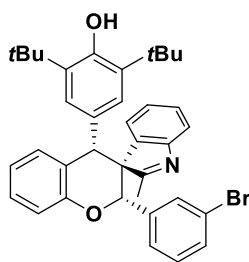

**phenol (3g)**, (petroleum ether/ethyl acetate= 10:1), 54 mg, yield: 89%, white solid, mp 234-235 °C, dr = 11:1,  $^1\text{H NMR}$  (400 MHz,  $\text{CDCl}_3$ ):  $\delta$  (ppm) 7.34-7.30 (m, 1H), 7.28-7.24 (m, 3H), 7.16-7.13 (m, 2H), 7.07 (d,  $J$  = 8.06 Hz, 1H), 7.00 (s, 1H), 6.93-6.89 (m, 3H), 6.82-6.77 (m, 2H), 5.99 (brs, 1H), 5.63 (s, 1H), 4.98 (s, 1H), 4.90 (s, 3H), 2.39 (s, 3H), 1.39 (s, 9H), 0.92 (s, 9H);  $^{13}\text{C NMR}$  (100 MHz,  $\text{CDCl}_3$ ):  $\delta$  (ppm) 179.2, 155.0, 154.7, 153.0, 137.8, 135.9, 131.8, 130.2, 130.1, 129.1, 128.6, 128.4, 126.9, 125.9, 125.4, 125.0, 124.3, 121.7, 121.4, 120.0, 116.3, 81.7, 65.1, 49.9, 34.0, 30.1, 17.7; **IR (KBr)**:  $\gamma$  3434, 2955, 1629, 1434, 1383, 1232, 1052, 762; **HRMS (ESI)**: calcd for  $\text{C}_{37}\text{H}_{38}\text{BrNO}_2$   $[\text{M}+\text{H}]^+$ : 608.2159, found: 608.2162.

**2,6-di-tert-butyl-4-(2'-methyl-2-(3-nitrophenyl)spiro[chromane-3,3'-indol]-4-yl)phenol (3h)**

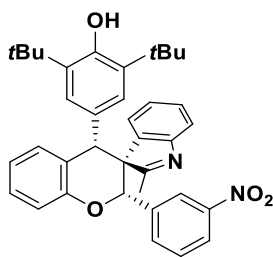

**phenol (3h)**, (petroleum ether/ethyl acetate= 7:1), 47mg, yield: 82%, white solid, mp 222-223 °C, dr = 15:1,  $^1\text{H NMR}$  (400 MHz,  $\text{CDCl}_3$ ):  $\delta$  (ppm) 7.99-7.69 (m, 1H), 7.81 (s, 1H), 7.38-7.28 (m, 2H), 7.24-7.21 (m, 2H), 7.19-7.16 (m, 2H), 7.11-7.06 (m, 2H), 6.99-6.91 (m, 2H), 6.80 (d,  $J$  = 7.74 Hz, 1H), 5.98 (brs, 1H), 5.79 (s, 1H), 5.11 (s, 1H), 4.93 (s, 1H), 2.45 (s, 3H), 1.38 (s, 9H), 0.89 (s, 9H);  $^{13}\text{C NMR}$  (100 MHz,  $\text{CDCl}_3$ ):  $\delta$  (ppm) 179.1,

155.7, 154.2, 153.1, 147.3, 137.6, 135.4, 132.7, 130.1, 128.9, 128.6, 128.6, 126.7, 125.9, 125.3, 124.2, 123.6, 122.0, 121.7, 120.0, 116.2, 81.0, 65.1, 49.5, 34.0, 30.0, 17.9; **IR (KBr)**:  $\gamma$  3438, 2955, 2923, 2858, 1626, 1532, 1437, 1351, 1234, 1055, 804, 757, 715; **HRMS (ESI)**: calcd for  $C_{37}H_{38}N_2O_4$   $[M+H]^+$ : 575.2904, found: 575.2909.

**2,6-di-tert-butyl-4-(2'-methyl-2-(m-tolyl)spiro[chromane-3,3'-indol]-4-yl)phenol**

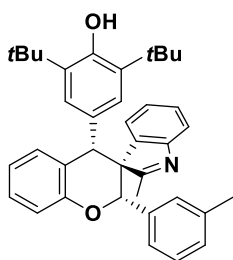

**(3i)**, (petroleum ether/ethyl acetate= 7:1), 43.8 mg, yield: 81%, white solid, mp 228-230 °C, dr = 9:1, **<sup>1</sup>H NMR (400 MHz, CDCl<sub>3</sub>)**:  $\delta$  (ppm) 7.38-7.36 (m, 1H), 7.29-7.26 (m, 1H), 7.24-7.22 (m, 1H), 7.15-7.12 (m, 2H), 7.09-7.07 (m, 1H), 6.96-6.92 (m, 3H), 6.91-6.87 (m, 1H), 6.78 (d,  $J$  = 7.74 Hz, 1H), 6.68-6.66 (m, 1H), 6.62 (s, 1H), 5.99 (brs, 1H), 5.64 (m, 1H), 4.96 (s, 1H), 4.92 (s, 1H), 2.37 (s, 3H), 2.09 (s, 3H), 1.39 (s, 9H), 0.92 (s, 9H); **<sup>13</sup>C NMR (100 MHz, CDCl<sub>3</sub>)**:  $\delta$  (ppm) 179.8, 156.1, 155.1, 152.9, 137.3, 136.5, 135.4, 130.1, 129.6, 128.3, 127.7, 127.6, 127.2, 126.0, 124.8, 124.5, 124.1, 121.1, 119.7, 116.3, 82.8, 65.1, 50.3, 34.0, 30.1, 21.2, 17.7; **IR (KBr)**:  $\gamma$  3434, 2953, 1580, 1434, 1374, 1231, 1116, 1052, 836, 773, 713; **HRMS (ESI)**: calcd for  $C_{38}H_{41}NO_2$   $[M+H]^+$ : 544.3210, found: 544.3213.

**2,6-di-tert-butyl-4-(2-(3-methoxyphenyl)-2'-methylspiro[chromane-3,3'-indol]-4-yl)phenol (3j)**

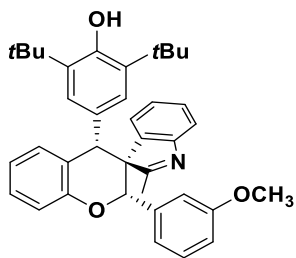

**(3j)**, (petroleum ether/ethyl acetate= 10:1), 52.9 mg, yield: 95%, white solid, mp 221-222 °C, dr > 19:1, **<sup>1</sup>H NMR (400 MHz, CDCl<sub>3</sub>)**:  $\delta$  (ppm) 7.39 (d,  $J$  = 7.38 Hz, 1H), 7.29 (d, 1H), 7.17-7.13(m, 2H), 7.09 (d,  $J$  = 7.71 Hz, 1H), 7.04-6.96 (m, 2H), 6.92-6.88 (m, 1H), 6.79 (d,  $J$  = 7.71 Hz, 1H), 6.71-6.69 (m, 1H), 6.62 (d,  $J$  = 7.60 Hz, 1H), 6.24 (s, 1H), 5.97 (brs, 1H), 5.66 (s, 1H), 4.98 (s, 1H), 4.93 (s, 1H), 3.38 (s, 3H), 2.37 (s, 3H), 1.39 (s, 9H), 0.92 (s, 9H); **<sup>13</sup>C NMR (100 MHz, CDCl<sub>3</sub>)**:  $\delta$  (ppm) 179.9, 158.8, 156.2, 155.0, 152.9, 136.9, 136.6, 130.2, 128.6, 128.3, 127.1, 126.0, 124.8, 124.5, 121.2, 119.9, 119.6, 116.3, 115.7, 111.2, 82.5, 65.1, 54.8, 50.4, 34.0, 30.3, 17.7; **IR (KBr)**:  $\gamma$  3433, 2953, 1604, 1434, 1375, 1232, 1161, 1645, 863, 777, 661; **HRMS (ESI)**: calcd for  $C_{38}H_{41}NO_3$   $[M+H]^+$ : 560.3108, found: 560.3104.

**2,6-di-tert-butyl-4-(2-(4-fluorophenyl)-2'-methylspiro[chromane-3,3'-indol]-4-yl)**

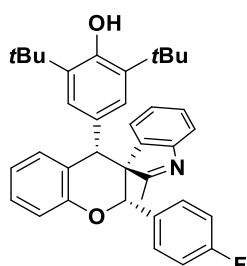

**phenol (3k)**, (petroleum ether/ethyl acetate= 8:1), 52.1mg, yield: 95%, white solid, mp 224-225 °C, dr > 19:1,  $^1\text{H NMR}$  (400 MHz,  $\text{CDCl}_3$ ):  $\delta$  (ppm) 7.35-7.33 (m, 1H), 7.30-7.23 (m, 2H), 7.15-7.12 (m, 2H), 7.08-6.97 (m, 2H), 6.92-6.84 (m, 3H), 6.79-6.71 (m, 3H), 5.97 (brs, 1H), 5.68 (s, 1H), 4.99 (s, 1H), 4.91 (s, 1H), 2.39 (s, 3H), 1.39 (s, 9H), 0.92 (s, 9H);  $^{13}\text{C NMR}$  (100 MHz,  $\text{CDCl}_3$ ):  $\delta$  (ppm) 179.5, 164.0, 161.5, 156.0, 154.8, 153.0, 136.1, 131.6, 131.5, 130.1, 128.7, 128.6, 128.5, 128.4, 127.0, 125.9, 124.9, 124.4, 119.9, 116.2, 114.8, 114.5, 81.8, 65.2, 50.1, 34.0, 30.1, 17.7; **IR (KBr)**:  $\gamma$  3433, 2956, 1607, 1512, 1435, 1377, 1228, 1157, 1052, 839, 768, 657; **HRMS (ESI)**: calcd for  $\text{C}_{37}\text{H}_{38}\text{FNO}_2$   $[\text{M}+\text{H}]^+$ : 548.2959, found: 548.2956.

**2,6-di-tert-butyl-4-(2-(4-chlorophenyl)-2'-methylspiro[chromane-3,3'-indol]-4-yl)**

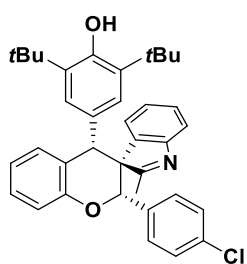

**phenol (3l)**, (petroleum ether/ethyl acetate= 8:1), 51.2 mg, yield: 91%, white solid, mp 209-210 °C, dr = 8:1,  $^1\text{H NMR}$  (400 MHz,  $\text{CDCl}_3$ ):  $\delta$  (ppm) 7.35-7.26 (m, 2H), 7.25-7.23 (m, 1H), 7.15-7.11 (m, 2H), 7.08-7.06 (m, 1H), 7.03-6.96 (m, 3H), 6.92-6.88 (m, 1H), 6.83-6.77 (m, 3H), 5.96 (brs, 1H), 5.67 (s, 1H), 4.99 (s, 1H), 4.91 (s, 1H), 2.39 (s, 3H), 1.39 (s, 9H), 0.92 (s, 9H);  $^{13}\text{C NMR}$  (100 MHz,  $\text{CDCl}_3$ ):  $\delta$  (ppm) 179.4, 156.0, 154.7, 153.0, 136.0, 134.6, 134.1, 130.1, 128.5, 128.4, 128.2, 127.9, 126.9, 125.9, 125.0, 124.4, 121.4, 120.0, 116.2, 81.8, 65.1, 50.0, 34.0, 30.0, 17.7; **IR (KBr)**:  $\gamma$  3431, 2956, 2924, 2858, 1627, 1436, 1381, 1231, 1114, 1052, 802, 766; **HRMS (ESI)**: calcd for  $\text{C}_{37}\text{H}_{38}\text{ClNO}_2$   $[\text{M}+\text{H}]^+$ : 564.2664, found: 564.2668.

**4-(2-(4-bromophenyl)-2'-methylspiro[chromane-3,3'-indol]-4-yl)-2,6-di-tert-butyl**

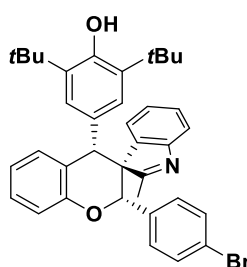

**phenol (3m)**, (petroleum ether/ethyl acetate= 8:1), 56.2 mg, yield: 93%, white solid, mp 230-231 °C, dr = >19:1,  $^1\text{H NMR}$  (400 MHz,  $\text{CDCl}_3$ ):  $\delta$  (ppm) 7.37-7.33 (m, 1H), 7.31-7.26 (m, 2H), 7.21-7.14 (m, 4H), 7.09 (d,  $J = 7.70$  Hz, 1H), 6.99-6.91 (m, 2H), 6.82-6.77 (m, 3H), 5.99 (brs, 1H), 5.68 (s, 1H), 5.04 (s, 1H), 4.93 (s, 1H), 2.42 (s, 3H), 1.42 (s, 9H), 0.94 (s, 9H);  $^{13}\text{C NMR}$  (100 MHz,  $\text{CDCl}_3$ ):  $\delta$  (ppm) 179.3, 156.0, 154.7, 153.0, 136.0, 134.7, 130.8, 130.1, 128.5, 128.5, 128.4, 126.9, 125.9, 125.0, 124.4, 122.9, 121.4, 120.0, 116.2, 81.8, 65.0,

50.0, 34.0, 30.1, 17.7; **IR (KBr)**:  $\gamma$  3436, 2957, 1581, 1484, 1436, 1231, 1113, 1052, 877, 766, 658; **HRMS (ESI)**: calcd for  $C_{37}H_{38}BrNO_2$   $[M+H]^+$ : 608.2159, found: 608.2163.

**4-(4-(3,5-di-tert-butyl-4-hydroxyphenyl)-2'-methylspiro[chromane-3,3'-indol]-2-**

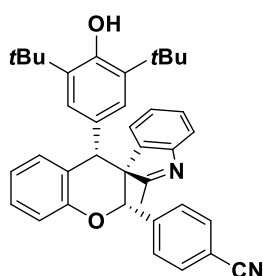

**yl)benzonitrile (3n)**, (petroleum ether/ethyl acetate= 7:1), 52.6 mg, yield: 95%, white solid, mp 231-232 °C, dr > 19:1,  **$^1H$  NMR (400 MHz,  $CDCl_3$ )**:  $\delta$  (ppm) 7.34-7.28 (m, 4H), 7.24-7.22 (m, 1H), 7.16-7.12 (m, 2H), 7.10-7.07 (m, 2H), 7.30 (d,  $J = 8.37$  Hz, 2H), 6.94-6.90 (m, 1H), 6.79 (d,  $J = 7.77$  Hz, 1H), 5.97 (brs, 1H), 5.74 (s, 1H), 5.01 (s, 1H), 4.92 (s, 1H),

2.44 (s, 3H), 1.39 (s, 9H), 0.91 (s, 9H);  **$^{13}C$  NMR (100 MHz,  $CDCl_3$ )**:  $\delta$  (ppm) 179.0, 155.8, 154.3, 153.1, 140.7, 135.6, 131.3, 130.1, 128.7, 128.5, 127.5, 126.6, 125.8, 125.1, 124.2, 121.6, 120.1, 118.3, 116.2, 112.4, 81.4, 65.1, 49.6, 34.0, 30.1, 17.9; **IR (KBr)**:  $\gamma$  3433, 2957, 2875, 2231, 1616, 1435, 1382, 1232, 1114, 1057, 805, 761, 694; **HRMS (ESI)**: calcd for  $C_{38}H_{38}N_2O_2$   $[M+H]^+$ : 555.3006, found: 555.3002.

**2,6-di-tert-butyl-4-(2'-methyl-2-(4-nitrophenyl)spiro[chromane-3,3'-indol]-4-yl)p**

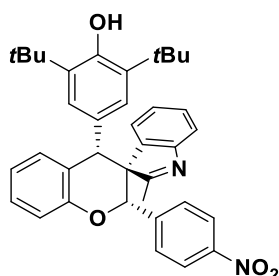

**henol (3o)**, (petroleum ether/ethyl acetate= 10:1), 55.1 mg, yield: 96%, white solid, mp 243-244 °C, dr > 19:1,  **$^1H$  NMR (400 MHz,  $CDCl_3$ )**:  $\delta$  (ppm) 7.91-7.89 (m, 2H), 7.34-7.29 (m, 2H), 7.25-7.23 (m, 1H), 7.17-7.13 (m, 1H), 7.12-7.08 (m, 4H), 6.99-6.92 (m, 2H), 6.80 (d,  $J = 7.74$  Hz, 1H), 5.98 (brs, 1H), 5.81 (s, 1H), 4.99 (s, 1H), 4.94 (s, 1H), 2.46 (s, 3H), 1.39 (s,

9H), 0.92 (s, 9H);  **$^{13}C$  NMR (100 MHz,  $CDCl_3$ )**:  $\delta$  (ppm) 178.9, 155.8, 154.2, 153.1, 147.8, 142.6, 135.5, 130.1, 128.8, 127.7, 126.6, 125.8, 125.2, 124.2, 122.7, 121.7, 120.1, 116.2, 81.1, 65.1, 49.6, 34.0, 30.0, 17.9; **IR (KBr)**:  $\gamma$  3435, 2958, 1607, 1526, 1435, 1346, 1231, 1057, 860, 761, 708; **HRMS (ESI)**: calcd for  $C_{37}H_{38}N_2O_4$   $[M+H]^+$ : 575.2904, found: 575.2907.



**2,6-di-tert-butyl-4-(2'-methyl-2-(4-(trifluoromethyl)phenyl)spiro[chromane-3,3'-i**

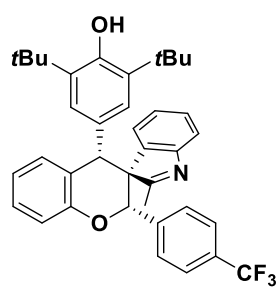

**ndol]-4-yl)phenol (3p)**, (petroleum ether/ethyl acetate= 10:1), 56.6 mg, yield: 95%, white solid, mp 216-217°C, dr >19:1, **<sup>1</sup>H NMR (400 MHz, CDCl<sub>3</sub>):** δ (ppm) 7.25-7.22 (m, 1H), 7.18-7.16 (m, 1H), 7.14-7.04 (m, 7H), 6.91 (d, *J* = 8.66 Hz, 1H), 6.69 (d, *J* = 2.33 Hz, 1H), 6.57-6.53 (m, 2H), 6.15 (brs, 1H), 5.67 (s, 1H), 5.01 (s, 1H), 4.99 (s, 1H), 3.85 (s, 3H), 1.39 (s, 9H), 0.99 (s, 9H). **<sup>13</sup>C NMR (100 MHz, CDCl<sub>3</sub>):** δ (ppm) 175.9, 159.9, 155.7, 153.2, 153.0, 135.3, 135.1, 130.9, 128.9, 128.7, 127.8, 127.3, 126.9, 126.8, 124.6, 124.6, 123.6, 115.1, 110.0, 108.6, 101.2, 81.8, 57.9, 55.3, 55.3, 34.0, 30.1; **IR (KBr):** γ 3436, 2959, 1626, 1435, 1382, 1326, 1232, 1127, 1068, 764; **HRMS (ESI):** calcd for C<sub>38</sub>H<sub>38</sub>F<sub>3</sub>NO<sub>2</sub> [M+H]<sup>+</sup>: 598.2927, found: 598.2924.

**2,6-di-tert-butyl-4-(2'-methyl-2-(p-tolyl)spiro[chromane-3,3'-indol]-4-yl)phenol**

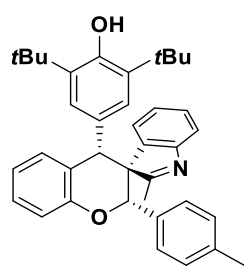

**(3q)**, (petroleum ether/ethyl acetate= 10:1), 49.3 mg, yield: 91%, white solid, mp 225-226 °C, dr > 19:1, **<sup>1</sup>H NMR (400 MHz, CDCl<sub>3</sub>):** δ (ppm) 7.37 (d, *J* = 7.04 Hz, 1H), 7.28 (d, 1H), 7.24 (s, 1H), 7.16-7.12 (m, 2H), 7.07 (d, *J* = 7.60 Hz, 1H), 6.97 (s, 1H), 6.91-6.84 (m, 3H), 6.78-6.74 (m, 3H), 5.96 (brs, 1H), 5.66 (s, 1H), 4.97 (s, 1H), 4.92 (s, 1H), 2.38 (s, 1H), 2.19 (s, 3H), 1.39 (s, 9H), 0.91 (s, 9H); **<sup>13</sup>C NMR (100 MHz, CDCl<sub>3</sub>):** δ (ppm) 179.9, 156.1, 155.1, 152.9, 138.6, 136.5, 132.6, 130.1, 128.5, 128.3, 128.3, 172.2, 126.8, 126.0, 124.9, 124.5, 121.1, 119.7, 116.3, 82.6, 65.1, 50.4, 34.0, 30.0, 21.1, 17.7; **IR (KBr):** γ 3430, 2968, 1633, 1435, 1382, 1232, 1050, 880, 769, 659; **HRMS (ESI):** calcd for C<sub>38</sub>H<sub>41</sub>NO<sub>2</sub> [M+K]<sup>+</sup>: 582.3120, found: 582.3118.

**2,6-di-tert-butyl-4-(2-(4-methoxyphenyl)-2'-methylspiro[chromane-3,3'-indol]-4-**

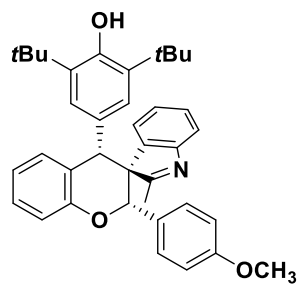

**yl)phenol (3r)**, (petroleum ether/ethyl acetate= 8:1), 48.6 mg, yield: 87%, white solid, mp 221-222°C, dr = 9:1, **<sup>1</sup>H NMR (400 MHz, CDCl<sub>3</sub>):** δ (ppm) 7.36 (d, *J* = 7.38 Hz, 1H), 7.29-7.24 (m, 2H), 7.16-7.12 (m, 2H), 7.08-7.06 (m, 1H), 6.97-6.87 (m, 2H), 6.79-6.77 (m, 3H), 6.57 (d, *J* = 8.72 Hz, 2H), 5.96 (brs, 1H), 5.64 (s, 1H), 4.97 (s, 1H), 4.91 (s, 1H), 3.67 (s, 3H), 2.37 (s, 3H), 1.39 (s, 9H), 0.92 (s, 9H); **<sup>13</sup>C NMR (100 MHz, CDCl<sub>3</sub>):** δ (ppm) 179.9, 159.8, 156.1, 155.1, 152.9, 136.5, 130.1, 128.3, 128.3, 128.2, 127.8,

127.2, 126.0, 124.5, 121.1, 119.8, 116.3, 113.2, 82.3, 65.1, 55.0, 50.4, 34.0, 30.0, 17.7; **IR (KBr)**:  $\gamma$  3434, 2957, 1612, 1515, 1436, 1376, 1230, 1178, 1044, 835, 766, 606; **HRMS (ESI)**: calcd for  $C_{38}H_{41}NO_3$   $[M+H]^+$ : 560.3159, found: 560.3162.

**2,6-di-tert-butyl-4-(2'-methyl-2-(naphthalen-2-yl)spiro[chromane-3,3'-indol]-4-yl**

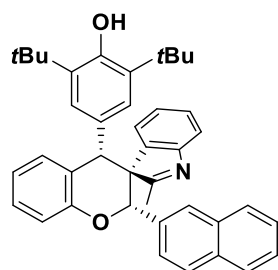

**)phenol (3s)**, (petroleum ether/ethyl acetate= 7:1), 49.8 mg, yield: 86%, white solid, mp 222-223 °C, dr = 7:1,  **$^1H$  NMR (600 MHz,  $CDCl_3$ )**:  $\delta$  (ppm) 7.66-7.64 (m, 1H), 7.58-7.56 (m, 1H), 7.48-7.43 (m, 2H), 7.39-7.34 (m, 3H), 7.30-7.22 (m, 1H), 7.25-7.23 (m, 1H), 7.19-7.15 (m, 1H), 7.11-7.05 (m, 2H), 6.98-6.88 (m, 3H), 6.81 (d,  $J$  = 7.67 Hz, 1H), 5.99 (brs, 1H),

5.82 (s, 1H), 4.99 (s, 1H), 4.95 (s, 1H), 2.39 (s, 3H), 1.39 (s, 9H), 0.92 (s, 9H);  **$^{13}C$  NMR (150 MHz,  $CDCl_3$ )**:  $\delta$  (ppm) 179.6, 156.1, 155.1, 153.0, 136.5, 133.5, 133.2, 132.6, 130.2, 128.4, 128.4, 128.1, 127.4, 127.4, 127.1, 126.7, 126.2, 126.1, 125.9, 124.9, 124.6, 124.4, 121.2, 119.9, 116.4, 82.8, 65.2, 50.4, 34.0, 30.2, 17.7; **IR (KBr)**:  $\gamma$  3433, 2955, 2922, 2860, 1580, 1454, 1381, 1230, 1158, 1053, 817, 753, 661; **HRMS (ESI)**: calcd for  $C_{41}H_{41}NO_2$   $[M+H]^+$ : 580.3210, found: 580.3213.

**2,6-di-tert-butyl-4-(2'-methyl-2-(3,4,5-trimethoxyphenyl)spiro[chromane-3,3'-indol]-4-yl)phenol (3t)**, (petroleum ether/ethyl acetate= 3:1),

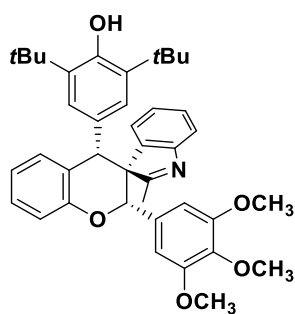

60.5 mg, yield: 98%, white solid, mp 168-169°C, dr = 8:1,  **$^1H$  NMR (600 MHz,  $CDCl_3$ )**:  $\delta$  (ppm) 7.38 (d,  $J$  = 7.44 Hz, 1H), 7.29-7.23 (m, 2H), 7.19 -7.13 (m, 2H), 7.09-7.08 (m, 1H), 6.96-6.88 (m, 2H), 6.81 (d,  $J$  = 7.78 Hz, 1H), 6.07 (s, 2H), 5.99 (brs, 1H), 5.57 (s, 1H), 5.01 (s, 1H), 4.91 (s, 1H), 3.72 (s, 3H), 3.49 (s, 6H), 2.36 (s, 3H), 1.39 (s, 9H), 0.93 (s, 9H);  **$^{13}C$**

**NMR (150 MHz,  $CDCl_3$ )**:  $\delta$  (ppm) 179.8, 156.4, 155.0, 153.0, 152.5, 138.4, 136.9, 130.8, 130.2, 128.3, 127.0, 126.0, 124.8, 124.4, 121.3, 120.1, 116.4, 104.5, 82.8, 65.1, 60.6, 55.8, 50.6, 34.0, 30.1, 17.6; **IR (KBr)**:  $\gamma$  3436, 2956, 2923, 1623, 1433, 1380, 1326.48, 1232, 846, 765; **HRMS (ESI)**: calcd for  $C_{40}H_{45}NO_5$   $[M+H]^+$ : 620.3370, found: 620.3374.

### 2,6-di-tert-butyl-4-(2'-methyl-2-(thiophen-3-yl)spiro[chromane-3,3'-indol]-4-yl)phenol (**3u**)

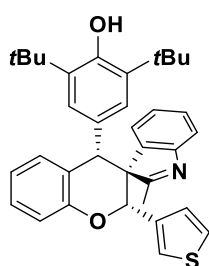

enol (**3u**), (petroleum ether/ethyl acetate= 8:1), 45.9 mg, yield: 86%, white solid, mp 219-220°C, dr = 10:1,  $^1\text{H NMR}$  (400 MHz,  $\text{CDCl}_3$ ):  $\delta$  (ppm) 7.35 (d,  $J = 7.3$  Hz, 1H), 7.29-7.25 (m, 2H), 7.19-7.06 (m, 3H), 6.99-6.97 (m, 2H), 6.91-6.87 (m, 1H), 6.83-6.77 (m, 2H), 6.40-6.39 (m, 1H), 5.96 (brs, 1H), 5.82 (s, 1H), 4.99 (s, 1H), 4.88 (s, 1H), 2.35 (s, 3H), 1.39 (s, 9H), 0.92 (s, 9H);  $^{13}\text{C NMR}$  (100 MHz,  $\text{CDCl}_3$ ):  $\delta$  (ppm) 179.8, 156.1, 154.8, 152.9, 136.8, 136.7, 130.1, 128.5, 128.3, 127.0, 126.0, 125.7, 125.0, 124.4, 123.7, 121.2, 119.9, 116.3, 78.3, 64.6, 50.2, 34.0, 30.3, 17.4; **IR (KBr)**:  $\gamma$  3438, 2957, 1629, 1436, 1382, 1230, 1118, 1050, 867, 767, 661; **HRMS (ESI)**: calcd for  $\text{C}_{35}\text{H}_{37}\text{NO}_2\text{S}$   $[\text{M}+\text{H}]^+$ : 536.2618, found: 536.2620.

### 2,6-di-tert-butyl-4-(2'-methyl-2-(pyridin-3-yl)spiro[chromane-3,3'-indol]-4-yl)phenol (**3v**)

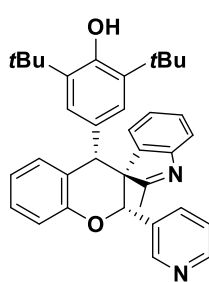

enol (**3v**), (petroleum ether/ethyl acetate= 2:1), 49.6 mg, yield: 94%, white solid, mp 231-232°C, dr > 19:1,  $^1\text{H NMR}$  (400 MHz,  $\text{CDCl}_3$ ):  $\delta$  (ppm) 8.38-8.33 (m, 2 H), 7.35 (d,  $J = 7.34$  Hz, 1H), 7.32-7.24 (m, 2H), 7.17-7.12 (m, 2H), 7.07 (d,  $J = 8.00$  Hz, 1 H), 7.01-6.89 (m, 4H), 6.81 (d,  $J = 7.72$  Hz, 1H), 5.98 (brs, 1H), 5.73 (s, 1H), 5.04 (s, 1H), 4.94 (s, 1H), 2.42 (s, 3H), 1.39 (s, 9H), 0.92 (s, 9H);  $^{13}\text{C NMR}$  (100 MHz,  $\text{CDCl}_3$ ):  $\delta$  (ppm) 179.2, 155.9, 154.6, 153.0, 150.1, 148.3, 135.7, 134.1, 131.4, 130.2, 128.7, 128.5, 126.8, 125.1, 124.3, 122.6, 121.5, 120.1, 116.2, 80.1, 65.0, 49.8, 34.0, 30.1, 17.7; **IR (KBr)**:  $\gamma$  3431, 2959, 1579, 1484, 1435, 1373, 1231, 1116, 1056, 941, 890, 767, 658; **HRMS (ESI)**: calcd for  $\text{C}_{36}\text{H}_{38}\text{N}_2\text{O}_2$   $[\text{M}+\text{H}]^+$ : 531.3006, found: 531.3002.

### 2,6-di-tert-butyl-4-(2'-methyl-2-propylspiro[chromane-3,3'-indol]-4-yl)phenol (**3w**)

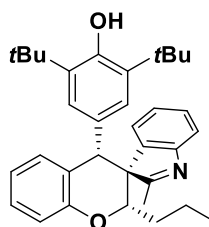

(**3w**), (petroleum ether/ethyl acetate= 7:1), 29.6 mg, yield: 60%, white solid, mp 204-205°C, dr = 8:1,  $^1\text{H NMR}$  (600 MHz,  $\text{CDCl}_3$ ):  $\delta$  (ppm) 7.29 (d,  $J = 7.63$  Hz, 1H), 7.25-7.21 (m, 2H), 7.10 (d,  $J = 7.09$  Hz, 1H), 7.07-7.01 (m, 2H), 6.90 (s, 1H), 6.84-6.81 (m, 1H), 6.74 (d,  $J = 7.67$  Hz, 1H), 5.87 (brs, 1H), 4.94 (s, 1H), 4.71 (s, 1H), 4.62-4.59 (m, 1H), 2.35 (s, 3H), 1.65-1.59 (m, 2H), 1.39 (s, 9H), 1.03-0.97 (m, 2H), 0.92 (s, 9H), 0.85-0.83 (m, 3H);  $^{13}\text{C NMR}$  (150 MHz,  $\text{CDCl}_3$ ):  $\delta$  (ppm) 180.9, 155.9, 154.7, 152.8, 137.3, 130.0, 128.1, 128.0, 127.1, 125.2, 125.0, 124.3, 120.6, 119.7, 116.0, 79.0, 64.4, 49.9, 34.0, 32.2, 30.2, 18.8, 17.0, 13.7; **IR (KBr)**:  $\gamma$  3439, 2958,

2873, 1581, 1437, 1379, 1234, 1122, 882, 766, 660; **HRMS (ESI)**: calcd for  $C_{34}H_{41}NO_2$   $[M+H]^+$ : 496.3372, found: 496.3375.

**2,6-di-tert-butyl-4-(2-isopropyl-2'-methylspiro[chromane-3,3'-indol]-4-yl)phenol**

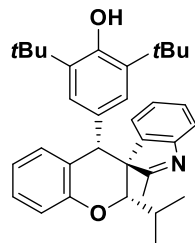

(**3x**), (petroleum ether/ethyl acetate= 10:1), 34.5 mg, yield: 70%, white solid, mp 211-212 °C, dr = 14:1,  **$^1H$  NMR (400 MHz,  $CDCl_3$ )**:  $\delta$  (ppm) 7.27-7.19 (m, 3H), 7.11 (d,  $J = 7.40$ Hz, 1H), 7.05-6.99 (m, 2H), 6.90 (s, 1H), 6.83-6.79 (m, 1H), 6.72 (d,  $J = 7.69$  Hz, 1H), 5.80 (brs, 1H), 5.03 (s, 1H), 4.71 (s, 1H), 4.55 (d,  $J = 2.96$  Hz, 1H), 2.37 (s, 3H), 1.51-1.46 (m, 1H), 1.39 (s, 9H), 0.98 (d,  $J = 6.81$  Hz, 3H), 0.91 (s, 9H), 0.36 (d,  $J = 6.81$  Hz, 3H);  **$^{13}C$  NMR (100 MHz,  $CDCl_3$ )**:  $\delta$  (ppm) 181.2, 155.7, 155.1, 152.9, 137.8, 134.5, 130.0, 128.1, 128.0, 127.1, 126.8, 125.8, 124.8, 124.5, 124.3, 120.6, 119.7, 116.0, 80.0, 77.4, 77.0, 76.7, 63.8, 51.1, 34.1, 33.8, 30.6, 30.0, 29.9, 22.0, 17.5, 16.9; **IR (KBr)**:  $\gamma$  3434, 2960, 1579, 1437, 1387, 1234, 1120, 1038, 892, 762; **HRMS (ESI)**: calcd for  $C_{34}H_{41}NO_2$   $[M+H]^+$ : 496.3372, found: 496.3370.

**2,6-di-tert-butyl-4-(5'-methoxy-2'-methyl-2-phenylspiro[chromane-3,3'-indol]-4-yl)phenol**

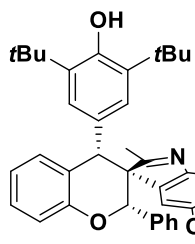

(**3y**), (petroleum ether/ethyl acetate= 5:1), 46.8 mg, yield: 84%, white solid, mp 214-215 °C, dr >19:1,  **$^1H$  NMR (600 MHz,  $CDCl_3$ )**:  $\delta$  (ppm) 7.27-7.25 (m, 1H), 7.17-7.14 (m, 1H), 7.08-7.05 (m, 3H), 7.02 (d,  $J = 8.59$  Hz, 1H), 6.97-6.93 (m, 4H), 6.89-6.87 (m, 1H), 6.79-6.76 (m, 2H), 6.07 (brs, 1H), 5.67 (s, 1H), 4.96 (s, 1H), 4.91 (s, 1H), 3.70 (s, 3H), 2.36 (s, 3H), 1.39 (s, 9H), 0.96 (s, 9H);  **$^{13}C$  NMR (150 MHz,  $CDCl_3$ )**:  $\delta$  (ppm) 177.4, 157.4, 155.0, 152.9, 150.1, 137.9, 135.7, 130.2, 128.8, 128.4, 127.7, 127.2, 127.0, 124.3, 121.2, 119.8, 116.3, 112.9, 112.9, 82.5, 65.2, 55.4, 50.2, 34.0, 30.1, 17.6; **IR (KBr)**:  $\gamma$  3436, 2954, 2923, 2855.73, 1623, 1465, 1379, 1231, 1157, 1038, 807, 761, 699; **HRMS (ESI)**: calcd for  $C_{38}H_{41}NO_3$   $[M+H]^+$ : 560.3159, found: 560.3155.

**2,6-di-tert-butyl-4-(5'-chloro-2'-methyl-2-phenylspiro[chromane-3,3'-indol]-4-yl)phenol**

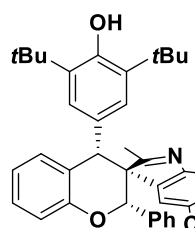

(**3z**), (petroleum ether/ethyl acetate= 7:1), 44.9 mg, yield: 80%, white solid, mp 206-207 °C, dr >19:1,  **$^1H$  NMR (400 MHz,  $CDCl_3$ )**:  $\delta$  (ppm) 7.35-7.28 (m, 2H), 7.22-7.15 (m, 2H), 7.11-7.07 (m, 3H), 7.01 (d,  $J = 8.29$  Hz, 1H), 6.95-6.91 (m, 4H), 6.83 (d,  $J = 7.71$  Hz, 1H), 6.07 (brs, 1H), 5.64 (s, 1H), 4.98 (s, 1H), 4.93 (s,

1H), 2.42 (s, 3H), 1.38 (s, 9H), 0.99 (s, 9H); <sup>13</sup>C NMR (100 MHz, CDCl<sub>3</sub>): δ (ppm) 180.4, 154.8, 154.5, 153.0, 138.5, 135.3, 130.6, 130.2, 128.9, 128.6, 128.4, 127.9, 126.9, 126.8, 126.2, 123.8, 121.5, 120.5, 116.6, 82.1, 66.1, 49.9, 34.0, 30.1, 17.8; IR (KBr): γ 3430, 2950, 2924, 2855, 1628, 1436, 1381, 1230, 1055, 781, 765; HRMS (ESI): calcd for C<sub>37</sub>H<sub>38</sub>ClNO<sub>2</sub> [M+H]<sup>+</sup>: 564.2664, found: 564.2661.

**2,6-di-tert-butyl-4-(2',6-dimethyl-2-phenylspiro[chromane-3,3'-indol]-4-yl)pheno**

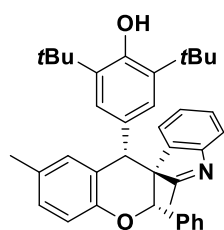

**l (4a)**, (petroleum ether/ethyl acetate= 7:1), 52.6 mg, yield: 97%, white solid, mp 218-229 °C, dr >19:1, <sup>1</sup>H NMR (400 MHz, CDCl<sub>3</sub>): δ (ppm) 7.38 (d, *J* = 7.30 Hz, 1H), 7.25-7.21 (m, 1H), 7.15-7.11 (m, 3H), 7.09-7.05 (m, 2H), 7.04-6.96 (m, 3H), 6.87 (d, *J* = 7.44 Hz, 2H), 6.59 (s, 1H), 5.98 (brs, 1H), 5.65 (s, 1H), 4.96 (s, 1H), 4.89 (s, 1H), 2.39 (s, 3H), 2.19 (s, 3H), 1.40 (s, 9H), 0.93 (s, 9H); <sup>13</sup>C NMR (100 MHz, CDCl<sub>3</sub>): δ (ppm) 179.8, 156.0, 152.9, 136.4, 135.7, 130.4, 130.2, 129.0, 128.8, 128.3, 127.7, 127.1, 126.9, 126.1, 124.8, 124.0, 119.7, 116.1, 82.5, 65.4, 50.3, 34.0, 30.1, 20.6, 17.7; IR (KBr): γ 3438, 2954, 2923, 2856, 1628, 1496, 1459, 1376, 1240, 814, 769, 700; HRMS (ESI): calcd for C<sub>38</sub>H<sub>41</sub>NO<sub>2</sub> [M+H]<sup>+</sup>: 544.3210 found: 544.3213.

**2,6-di-tert-butyl-4-(6-methoxy-2'-methyl-2-phenylspiro[chromane-3,3'-indol]-4-y**

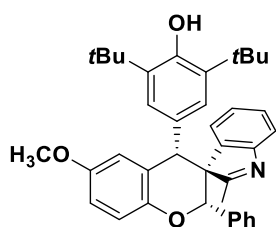

**lphenol (4b)**, (petroleum ether/ethyl acetate= 7:1), 50.2 mg, yield: 90%, white solid, mp 208-209 °C, dr = 12:1, <sup>1</sup>H NMR (400 MHz, CDCl<sub>3</sub>): δ (ppm) 7.38 (d, *J* = 7.26 Hz, 1H), 7.25-7.22 (m, 1H), 7.16-7.11 (m, 3H), 7.05-7.01 (m, 3H), 6.95 (s, 1H), 6.88-6.83 (m, 3H), 6.30 (d, *J* = 2.24 Hz, 1H), 5.98 (brs, 1H), 5.64 (s, 1H), 4.97 (s, 1H), 4.89 (s, 1H), 3.63 (s, 3H), 2.38 (s, 3H), 1.39 (s, 9H), 0.92 (s, 9H); <sup>13</sup>C NMR (100 MHz, CDCl<sub>3</sub>): δ (ppm) 179.7, 156.1, 153.8, 153.0, 149.1, 136.4, 135.8, 128.8, 128.3, 127.7, 127.2, 126.9, 126.0, 125.3, 124.8, 119.8, 116.9, 115.1, 114.1, 82.6, 65.2, 55.7, 50.5, 34.0, 30.2, 17.7; IR (KBr): γ 3436, 2956, 2923, 1618.42, 1501, 1437, 1377, 1237, 1160, 1037, 835, 768, 702; HRMS (ESI): calcd for C<sub>38</sub>H<sub>41</sub>NO<sub>3</sub> [M+H]<sup>+</sup>: 560.3159, found: 560.3163.

**2,6-di-tert-butyl-4-(6-chloro-2'-methyl-2-phenylspiro[chromane-3,3'-indol]-4-yl)**

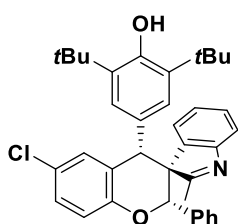

**phenol (4c)**, (petroleum ether/ethyl acetate= 7:1), 45.5 mg, yield: 81%, white solid, mp 199-200 °C, dr >19:1,  $^1\text{H NMR}$  (400 MHz,  $\text{CDCl}_3$ ):  $\delta$  (ppm) 7.34 (d,  $J = 7.38$  Hz, 1H), 7.27-7.22 (m, 2H), 7.17-7.11 (m, 3H), 7.06-7.00 (m, 3H), 6.95-6.85 (m, 3H), 6.77 (d,  $J = 1.49$  Hz, 1H), 5.94 (brs, 1H), 5.66 (s, 1H), 5.03 (s, 1H), 4.86 (s, 1H), 2.37 (s, 3H), 1.39 (s, 9H), 0.93 (s, 9H);  $^{13}\text{C NMR}$  (100 MHz,  $\text{CDCl}_3$ ):  $\delta$  (ppm) 179.3, 156.1, 153.6, 153.2, 136.0, 135.2, 129.6, 129.0, 128.6, 128.4, 127.8, 127.2, 126.9, 126.4, 126.2, 126.1, 125.8, 125.0, 124.3, 119.9, 117.7, 82.8, 64.7, 50.25, 34.0, 30.1, 17.7; **IR (KBr)**:  $\gamma$  3428, 2921, 2852, 1632, 1473, 1382, 1234, 1118, 815, 770, 701; **HRMS (ESI)**: calcd for  $\text{C}_{37}\text{H}_{38}\text{ClNO}_2$  [ $\text{M}+\text{H}$ ] $^+$ : 564.2664, found: 564.2668.

**4-(6-bromo-2'-methyl-2-phenylspiro[chromane-3,3'-indol]-4-yl)-2,6-di-tert-butyl**

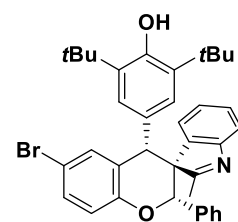

**phenol (4d)**, (petroleum ether/ethyl acetate= 7:1), 50.1 mg, yield: 83%, white solid, mp 205-206 °C, dr >19:1,  $^1\text{H NMR}$  (400 MHz,  $\text{CDCl}_3$ ):  $\delta$  (ppm) 7.38-7.32 (m, 2H), 7.27-7.23 (m, 1H), 7.17-7.10 (m, 3H), 7.06-7.02 (m, 2H), 6.97-6.91 (m, 3H), 6.86 (d,  $J = 7.32$  Hz, 2H), 5.94 (brs, 1H), 5.65 (s, 1H), 5.04 (s, 1H), 4.86 (s, 1H), 2.37 (s, 3H), 1.39 (s, 9H), 0.93 (s, 9H);  $^{13}\text{C NMR}$  (100 MHz,  $\text{CDCl}_3$ ):  $\delta$  (ppm) 179.2, 156.1, 154.2, 153.2, 136.0, 135.2, 132.5, 131.4, 129.0, 128.6, 127.8, 127.2, 126.9, 126.8, 126.2, 125.7, 125.0, 124.4, 120.0, 118.2, 113.4, 82.8, 64.7, 50.1, 34.0, 30.1, 17.7; **IR (KBr)**:  $\gamma$  3438, 2954, 2921, 2853, 1634, 1471, 1381, 1235, 1117, 885, 818, 768, 703; **HRMS (ESI)**: calcd for  $\text{C}_{37}\text{H}_{38}\text{BrNO}_2$  [ $\text{M}+\text{H}$ ] $^+$ : 608.2159, found: 608.2155.

**2,6-di-tert-butyl-4-(7-methoxy-2'-methyl-2-phenylspiro[chromane-3,3'-indol]-4-yl)**

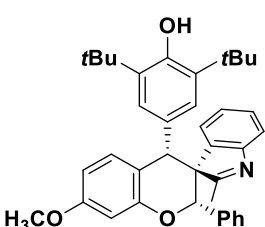

**phenol (4e)**, (petroleum ether/ethyl acetate= 5:1), 47.9 mg, yield: 86%, white solid, mp 227-228 °C, dr = 10:1,  $^1\text{H NMR}$  (600 MHz,  $\text{CDCl}_3$ ):  $\delta$  (ppm) 7.38 (d,  $J = 7.37$  Hz, 1H), 7.24-7.22 (m, 1H), 7.16-7.11 (m, 3H), 7.06-7.02 (m, 2H), 6.95-6.86 (m, 3H), 6.68-6.64 (m, 2H), 6.49-6.47 (m, 1H), 5.97 (brs, 1H), 5.67 (s, 1H), 4.94 (s, 1H), 4.86 (s, 1H), 3.83 (s, 3H), 2.38 (s, 3H), 1.39 (s, 9H), 0.93 (s, 9H);  $^{13}\text{C NMR}$  (150 MHz,  $\text{CDCl}_3$ ):  $\delta$  (ppm) 179.7, 159.8, 156.1, 155.8, 152.9, 136.3, 135.6, 130.8, 128.8, 128.3, 127.7, 127.3, 126.9, 126.0, 124.8, 119.8, 116.6, 108.2, 100.9, 82.9, 65.4, 55.3, 49.90, 34.0, 30.1, 17.7; **IR (KBr)**:  $\gamma$  3431, 2955,

2922, 2855, 1619, 1438, 1379, 1238, 1160, 1038, 836, 735, 702; **HRMS (ESI)**: calcd for  $C_{38}H_{41}NO_3$   $[M+H]^+$ : 560.3159, found: 560.3104.

**2,6-di-tert-butyl-4-(2',7-dimethyl-2-phenylspiro[chromane-3,3'-indol]-4-yl)pheno**

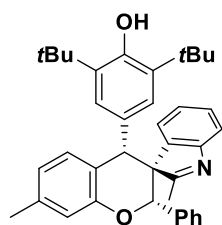

**l (4f)**, (petroleum ether/ethyl acetate= 7:1), 44.3 mg, yield: 82%, white solid, mp 236-237 °C, dr = 10:1,  **$^1H$  NMR (400 MHz,  $CDCl_3$ )**:  $\delta$  (ppm); 7.38 (d,  $J$  = 7.35 Hz, 1 H), 7.24-7.21 (m, 1H), 7.16-7.10 (m, 3H), 7.06-6.96 (m, 3H), 6.91-6.86 (m, 3H), 6.71-6.63 (m, 2H), 5.97 (brs, 1H), 5.66 (s, 1H), 4.97 (s, 1H), 4.88 (s, 1H), 2.38 (s, 3H), 2.37 (s, 3H), 1.39 (s, 9H), 0.92 (s, 9H);  **$^{13}C$  NMR (100 MHz,  $CDCl_3$ )**:  $\delta$  (ppm) 179.8, 156.09, 154.7, 152.9, 138.3, 136.4, 135.7, 129.9, 128.8, 128.2, 127.7, 127.2, 126.9, 126.0, 124.8, 122.1, 121.4, 119.7, 116.7, 82.6, 65.3, 50.1, 34.0, 30.2, 21.2, 17.8; **IR (KBr)**:  $\gamma$  3435, 2956, 2920, 2870, 1621, 1436, 1378, 1244, 892, 1124, 1049, 802, 736, 700; **HRMS (ESI)**: calcd for  $C_{38}H_{41}NO_2$   $[M+H]^+$ : 544.3210, found: 544.3218.

## Reference

1. Zhao, K.; Zhi, Y.; Shu T.; Valkonen, A.; Rissanen, K.; Enders, D. *Angew. Chem. Int. Ed.* **2016**, *55*, 12104.
2. Liu, Z. S.; Li, W. K.; Kang, T. R.; He, L.; Liu Q.-Z. *Org. Lett.* **2015**, *17*, 150.

## NMR spectra for compounds 3-4

### 2,6-di-tert-butyl-4-(2'-methyl-2-phenylspiro[chromane-3,3'-indol]-4-yl)phenol (3a)

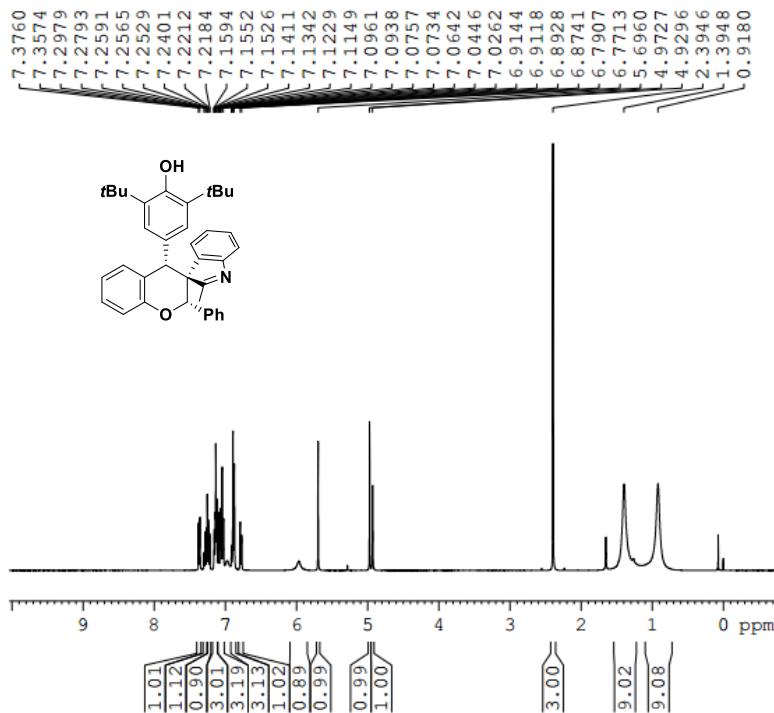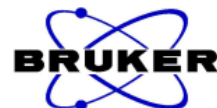

```

NAME      20161117-XQM161109-DOWN
EXPNO    2
PROCNO    1
Date_     20161117
Time      17.47 h
INSTRUM   spect
PROBHD    Z108618_0670 (
PULPROG   zg30
TD         65536
SOLVENT   CDCl3
NS         16
DS         2
SWH        8012.820 Hz
FIDRES     0.244532 Hz
AQ         4.0894966 sec
RG         76.1
DW         62.400 usec
DE         6.50 usec
TE         295.1 K
D1         1.00000000 sec
TDO        1
SFO1      400.1324708 MHz
NUC1       1H
P1         14.33 usec
SI         65536
SF         400.1300127 MHz
WDW        EM
SSB        0
LB         0.30 Hz
GB         0
PC         1.00
    
```

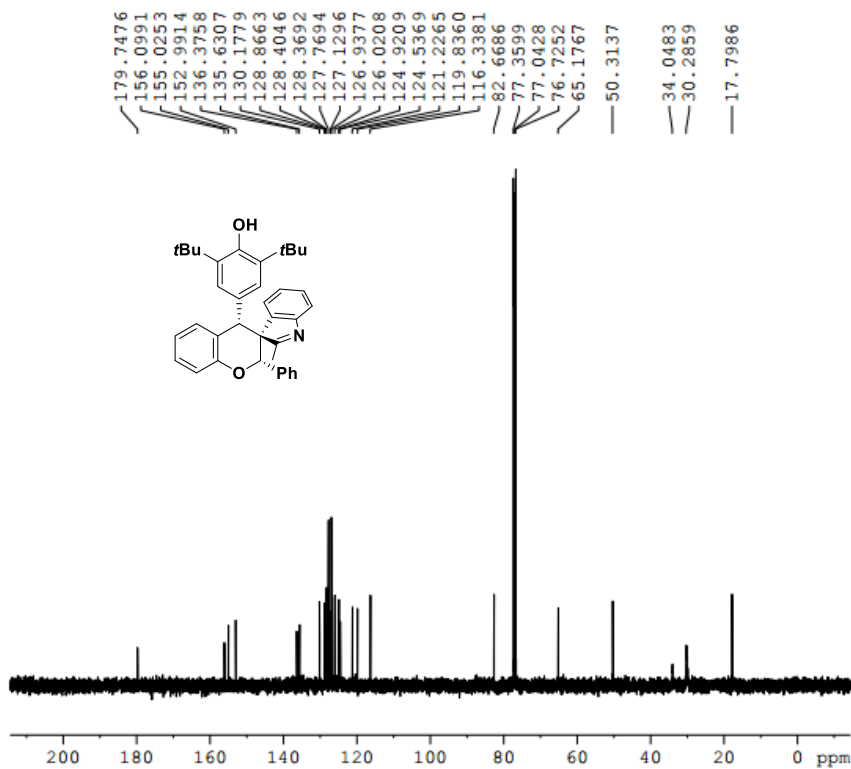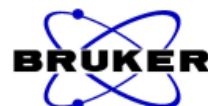

```

NAME      20161117-XQM161109-D
EXPNO    1
PROCNO    1
Date_     20161117
Time      17.42 h
INSTRUM   spect
PROBHD    Z108618_0670 (
PULPROG   zgpg30
TD         65536
SOLVENT   CDCl3
NS         60
DS         4
SWH        24038.461 Hz
FIDRES     0.733596 Hz
AQ         1.3631988 sec
RG         211.8
DW         20.800 usec
DE         6.50 usec
TE         295.7 K
D1         2.00000000 sec
D11        0.03000000 sec
TDO        1
SFO1      100.6228298 MHz
NUC1       13C
P1         9.43 usec
SI         32768
SF         100.6127690 MHz
WDW        EM
SSB        0
LB         1.00 Hz
GB         0
PC         1.40
    
```



# 2,6-di-tert-butyl-4-(2'-ethyl-2-phenylspiro[chromane-3,3'-indol]-4-yl)phenol (3b)

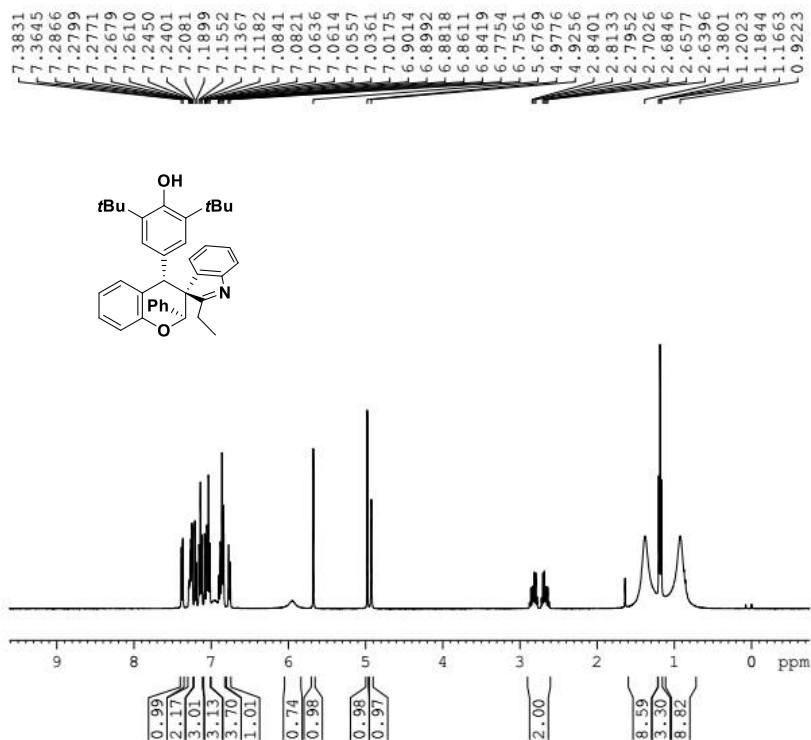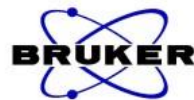

```

NAME      xqm18-2Et-1-HH
EXPNO     1
PROCNO    1
Date_     20180315
Time      15.41
INSTRUM   spect
PROBHD    5 mm FAPBO BB-
PULPROG   zg30
TD         65536
SOLVENT   CDCl3
NS         8
DS         2
SWH        8223.685 Hz
FIDRES     0.125483 Hz
AQ         3.9846387 sec
RG         203
DM         60.800 usec
DE         6.50 usec
TE         296.5 K
D1         1.00000000 sec
TD0        1

===== CHANNEL f1 =====
NUC1       1H
P1         13.00 usec
PL1        -2.60 dB
PL1W       17.82643890 W
SFO1       400.1524711 MHz
SI         32768
SF         400.1500148 MHz
WDW        EM
SSB        0
LB         0.30 Hz
GB         0
PC         1.00
    
```

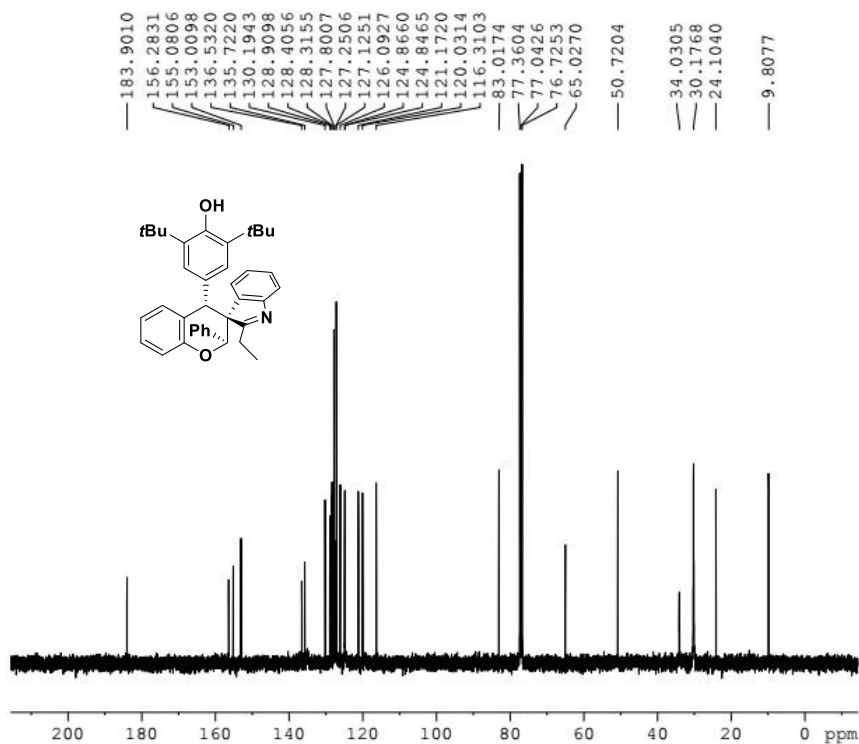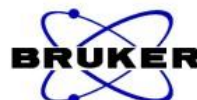

```

NAME      xqm18-2Et-1-c
EXPNO     1
PROCNO    1
Date_     20180315
Time      16.16
INSTRUM   spect
PROBHD    5 mm FAPBO BB-
PULPROG   zgpg30
TD         65536
SOLVENT   CDCl3
NS         81
DS         4
SWH        24038.461 Hz
FIDRES     0.366798 Hz
AQ         1.3631988 sec
RG         203
DM         20.800 usec
DE         6.50 usec
TE         297.9 K
D1         2.00000000 sec
D11        0.03000000 sec
TD0        1

===== CHANNEL f1 =====
NUC1       13C
P1         11.50 usec
PL1        -3.00 dB
PL1W       68.16146088 W
SFO1       100.6278593 MHz

===== CHANNEL f2 =====
CPDPRG2   waltz16
NUC2       1H
ECPD2     90.00 usec
PL2        -2.60 dB
PL12       13.88 dB
PL13       14.50 dB
PL2W       17.82643890 W
PL12W      0.40092635 W
PL13W      0.34758785 W
SFO2       400.1516006 MHz
SI         32768
SF         100.6177980 MHz
WDW        EM
SSB        0
LB         1.00 Hz
GB         0
PC         1.40
    
```

# 2,6-di-tert-butyl-4-(2,2'-diphenylspiro[chromane-3,3'-indol]-4-yl)phenol (3c)

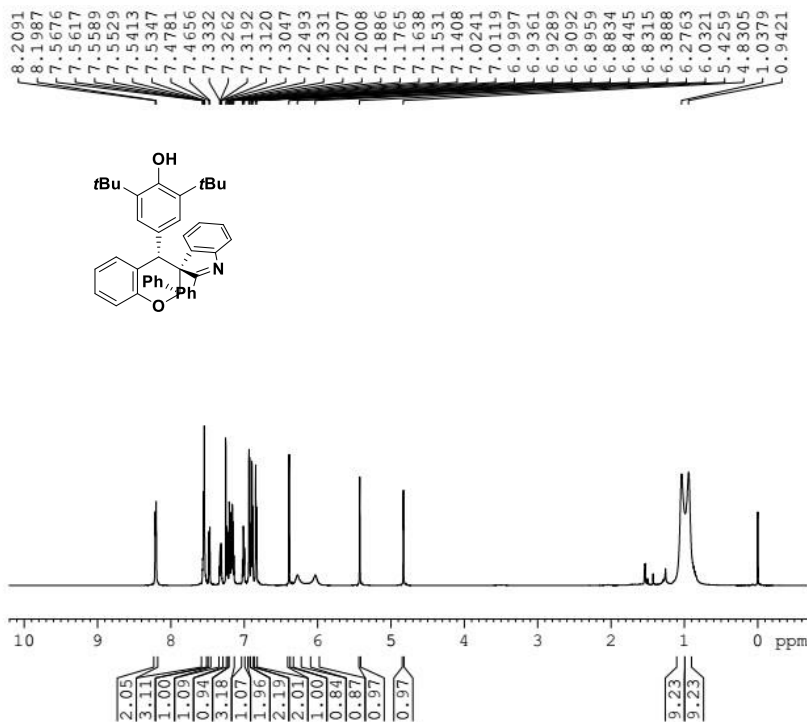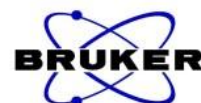

```

NAME      GQX-1H (38-48)
EXPNO    40
PROCNO   1
Date_    20170730
Time     20.15
INSTRUM  spect
PROBHD   5 mm PABBO BB/
PULPROG  zg30
TD        65536
SOLVENT  CDCl3
NS        16
DS        2
SWH       12019.230 Hz
FIDRES    0.183399 Hz
AQ        2.7263477 sec
RG        69.12
DW        41.600 usec
DE        6.50 usec
TE        302.0 K
D1        1.00000000 sec
TDO       1
===== CHANNEL f1 =====
SFO1     600.1337060 MHz
NUC1     1H
P1       12.36 usec
SI       65536
SF       600.1300219 MHz
WDW      EM
SSB      0
LB       0.30 Hz
GB       0
PC       1.00
    
```

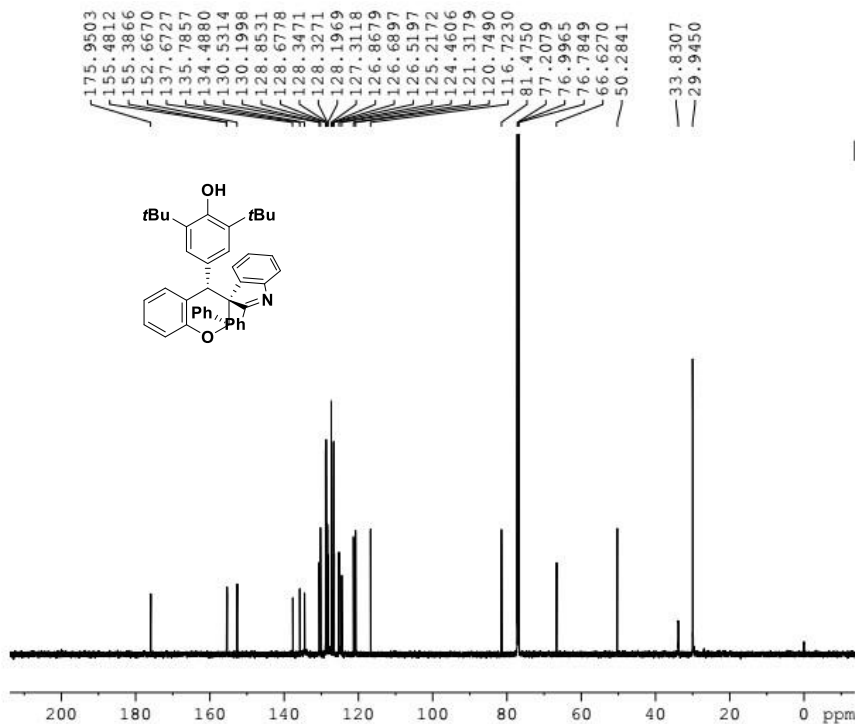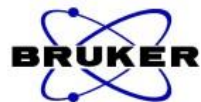

```

NAME      GQX-13C (38-48)
EXPNO    40
PROCNO   1
Date_    20170730
Time     21.07
INSTRUM  spect
PROBHD   5 mm PABBO BB/
PULPROG  zgpg30
TD        65536
SOLVENT  CDCl3
NS        1024
DS        4
SWH       36057.691 Hz
FIDRES    0.550197 Hz
AQ        0.9068159 sec
RG        188.59
DW        13.867 usec
DE        6.50 usec
TE        302.8 K
D1        2.00000000 sec
D11       0.03000000 sec
TDO       1
===== CHANNEL f1 =====
SFO1     150.9178981 MHz
NUC1     13C
P1       13.76 usec
SI       32768
SF       150.9028090 MHz
WDW      EM
SSB      0
LB       1.00 Hz
GB       0
PC       1.40
    
```

**2,6-di-tert-butyl-4-(2-(2-chlorophenyl)-2'-methylspiro[chromane-3,3'-indol]-4-yl)phenol (3d)**

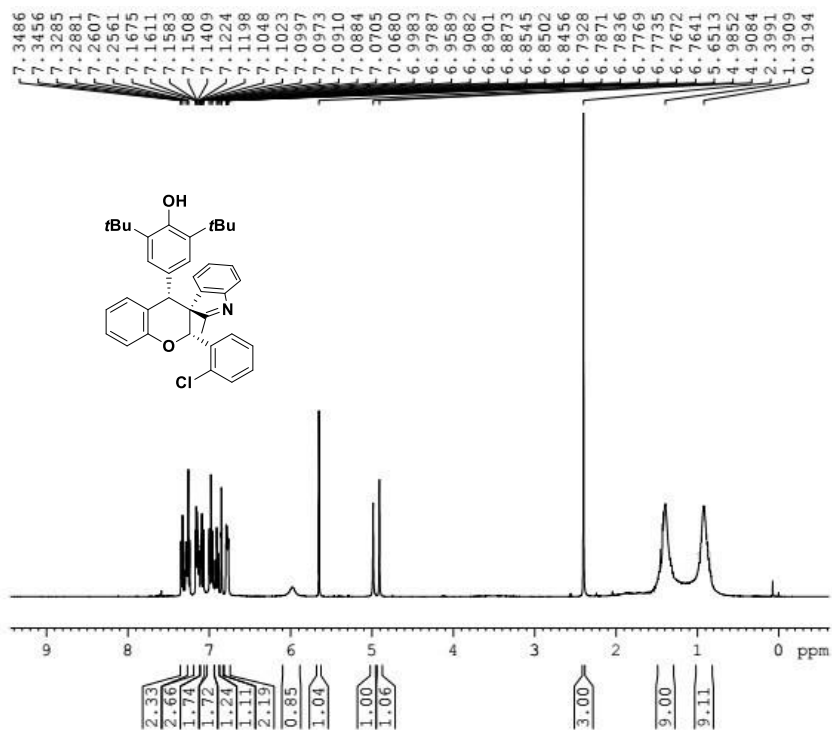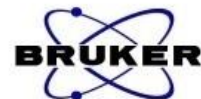

```

NAME      20170627-XQM170531-11
EXPNO    1
PROCNO   1
Date_    20170627
Time     17.04 h
INSTRUM  spect
PROBHD   Z108618_0670 (
PULPROG  zg30
TD        65536
SOLVENT  CDCl3
NS        8
DS        0
SWH       8012.820 Hz
FIDRES    0.244532 Hz
AQ        4.0894966 sec
RG        76.1
DW        62.400 usec
DE        6.50 usec
TE        296.7 K
D1        1.00000000 sec
TDO       1
SFO1     400.1324708 MHz
NUC1      1H
P1        14.33 usec
SI        65536
SF        400.1300114 MHz
RGW       EM
SSB       0
LB        0.30 Hz
GB        0
PC        1.00
    
```

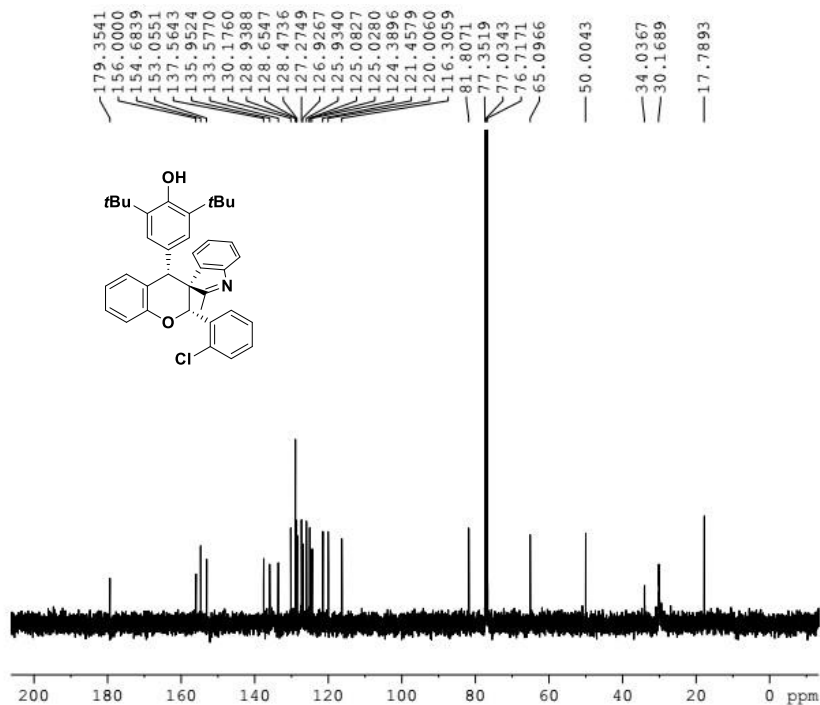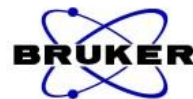

```

NAME      20170627-XQM170531-11
EXPNO    2
PROCNO   1
Date_    20170627
Time     17.09 h
INSTRUM  spect
PROBHD   Z108618_0670 (
PULPROG  zgpg30
TD        65536
SOLVENT  CDCl3
NS        40
DS        0
SWH       24038.461 Hz
FIDRES    0.733596 Hz
AQ        1.3631988 sec
RG        211.8
DW        20.800 usec
DE        6.50 usec
TE        297.3 K
D1        2.00000000 sec
D11       0.03000000 sec
TDO       1
SFO1     100.6228298 MHz
NUC1      13C
P1        9.43 usec
SI        32768
SF        100.6127690 MHz
RGW       EM
SSB       0
LB        1.00 Hz
GB        0
PC        1.40
    
```

**4-(2-(2-bromophenyl)-2'-methylspiro[chromane-3,3'-indol]-4-yl)-2,6-di-tert-butyl phenol (3e)**

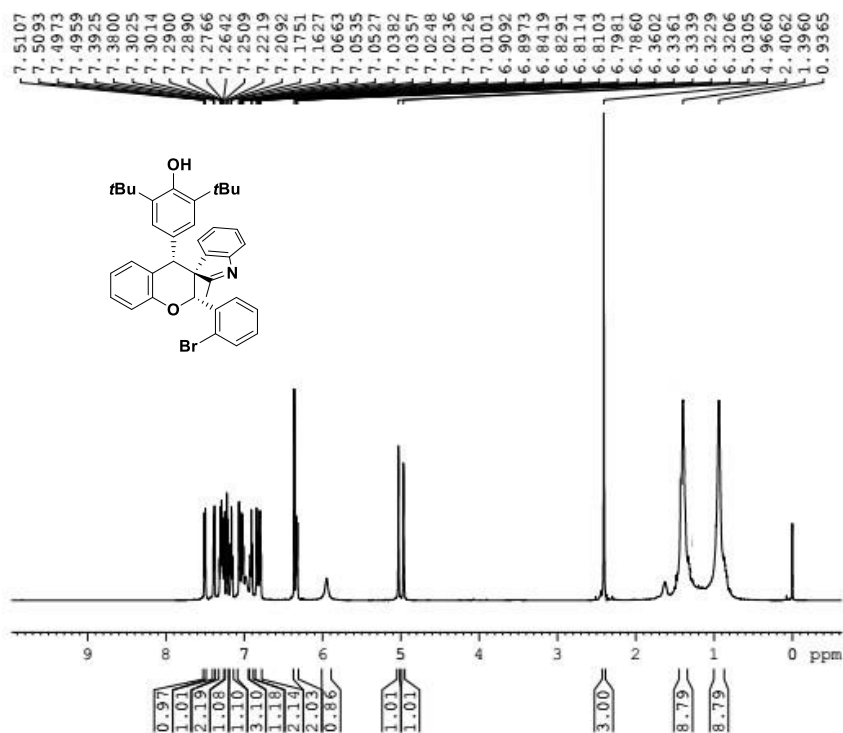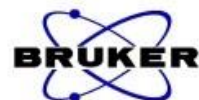

```

NAME          XQM-1H
EXPNO         35
PROCNO        1
Date_         20170917
Time          20.01
INSTRUM       spect
PROBHD        5 mm PABBO BB/
PULPROG       zg30
TD            65536
SOLVENT       CDCl3
NS            16
DS            2
SWH           12019.230 Hz
FIDRES        0.183399 Hz
AQ            2.7263471 sec
RG            49.16
DW            41.600 usec
DE            6.50 usec
TE            301.9 K
D1            1.00000000 sec
TD0           1

----- CHANNEL f1 -----
SF01          600.1337060 MHz
NUC1          1H
P1            12.36 usec
SI            65536
SF            600.1300213 MHz
WNR           EM
SSB           0
LB            0.30 Hz
GB            0
PC            1.00
    
```

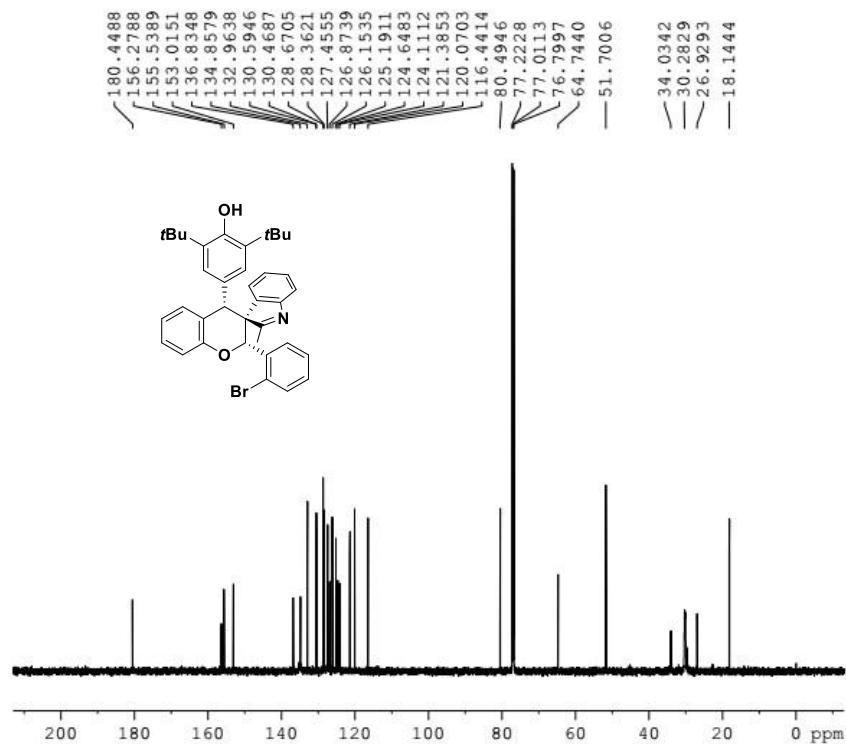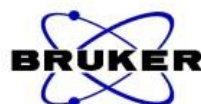

```

NAME          XQM-13C
EXPNO         8
PROCNO        1
Date_         20170917
Time          20.12
INSTRUM       spect
PROBHD        5 mm PABBO BB/
PULPROG       zgpg30
TD            65536
SOLVENT       CDCl3
NS            512
DS            4
SWH           36057.691 Hz
FIDRES        0.550197 Hz
AQ            0.9088159 sec
RG            188.59
DW            13.867 usec
DE            6.50 usec
TE            302.6 K
D1            2.00000000 sec
D11           0.03000000 sec
TD0           1

===== CHANNEL f1 =====
SF01          150.9178981 MHz
NUC1          13C
P1            13.76 usec
SI            32768
SF            150.9028090 MHz
WNR           EM
SSB           0
LB            1.00 Hz
GB            0
PC            1.40
    
```

**2,6-di-tert-butyl-4-(2-(3-chlorophenyl)-2'-methylspiro[chromane-3,3'-indol]-4-yl)phenol (3f)**

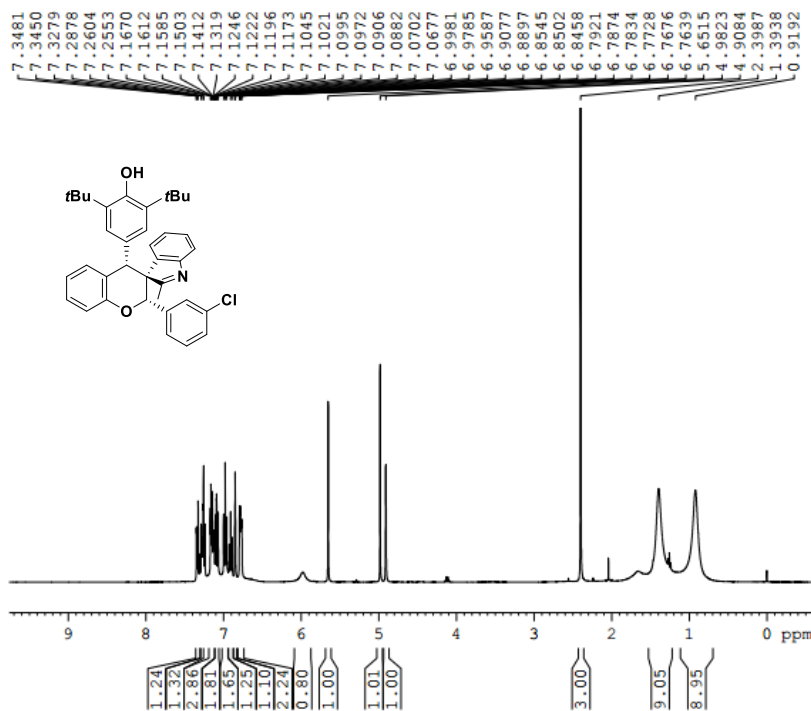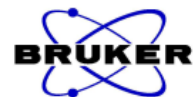

```

NAME      20170605-XQM170525-2
EXPNO    1
PROCNO    1
Date_    20170605
Time     17.00 h
INSTRUM   spect
PROBHD    Z108618_0670 (
PULPROG   zgpg30
TD         65536
SOLVENT   CDCl3
NS         17
DS         0
SWH        8012.820 Hz
FIDRES     0.244532 Hz
AQ         4.089496 sec
RG         83.48
DW         62.400 usec
DE         6.50 usec
TE         297.0 K
D1         1.0000000 sec
TDO        1
SFO1      400.1324708 MHz
NUC1       1H
P1         14.33 usec
SI         65536
SF         400.1300117 MHz
WDW        EM
SSB        0
LB         0.30 Hz
GB         0
PC         1.00
    
```

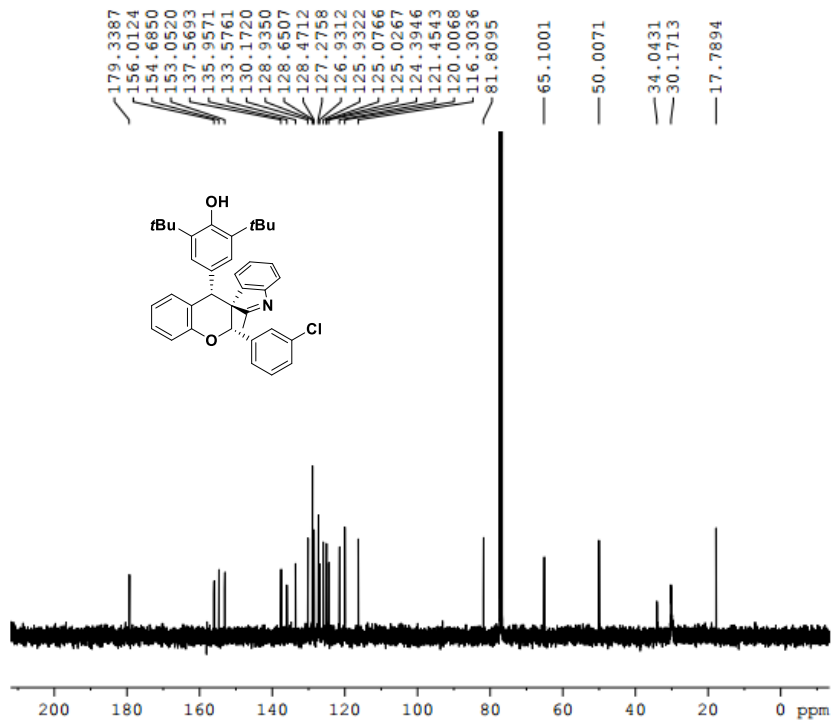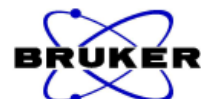

```

NAME      20170605-XQM170525-2
EXPNO    2
PROCNO    1
Date_    20170605
Time     17.07 h
INSTRUM   spect
PROBHD    Z108618_0670 (
PULPROG   zgpg30
TD         65536
SOLVENT   CDCl3
NS         80
DS         0
SWH        24038.461 Hz
FIDRES     0.733596 Hz
AQ         1.3631988 sec
RG         211.8
DW         20.800 usec
DE         6.50 usec
TE         297.8 K
D1         2.0000000 sec
D11        0.0300000 sec
TDO        1
SFO1      100.6228298 MHz
NUC1       13C
P1         9.43 usec
SI         32768
SF         100.6127690 MHz
WDW        EM
SSB        0
LB         1.00 Hz
GB         0
PC         1.40
    
```

# 4-(2-(3-bromophenyl)-2'-methylspiro[chromane-3,3'-8indol]-4-yl)-2,6-di-tert-butylphenol (3g)

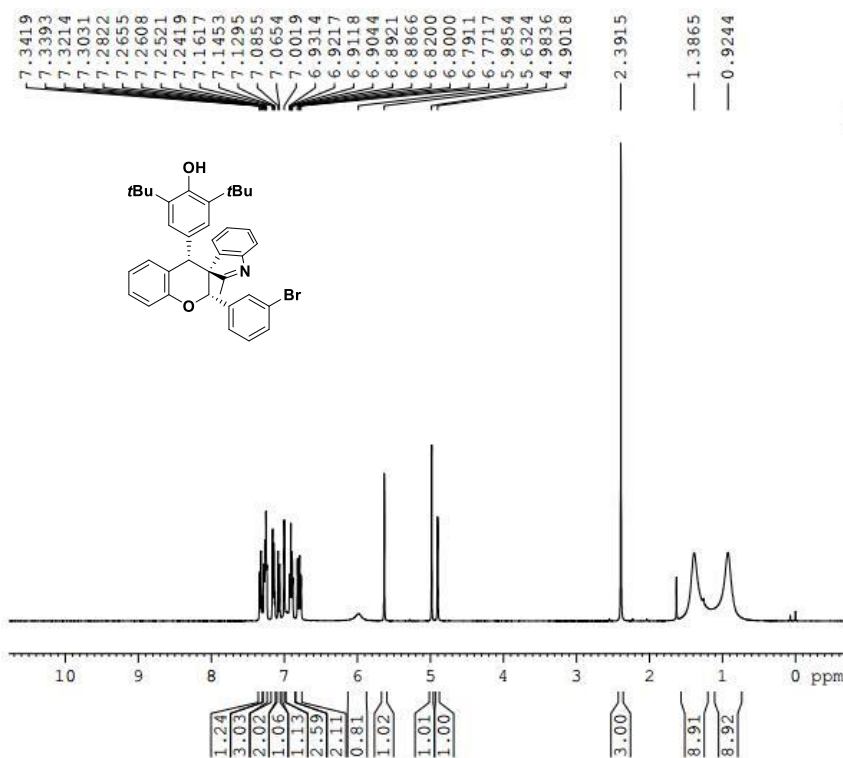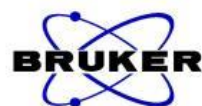

```

NAME      xqm18-3Br-1
EXPNO     1
PROCNO    1
Date_     20180423
Time      16.05
INSTRUM   spect
PROBHD    5 mm FAPBO BB-
PULPROG   zg30
TD         65536
SOLVENT   CDCl3
NS         8
DS         2
SWH        8223.685 Hz
FIDRES     0.125483 Hz
AQ         3.9846387 sec
RG         181
LW         60.800 usec
DE         6.50 usec
TE         300.8 K
D1         1.00000000 sec
TD0        1

===== CHANNEL f1 =====
NUC1       1H
P1         13.00 usec
PL1        -2.60 dB
PL1W       17.82643890 W
SFO1       400.1524711 MHz
SI         32768
SF         400.1500120 MHz
WDW        EM
SSB        0
LB         0.30 Hz
GB         0
PC         1.00
    
```

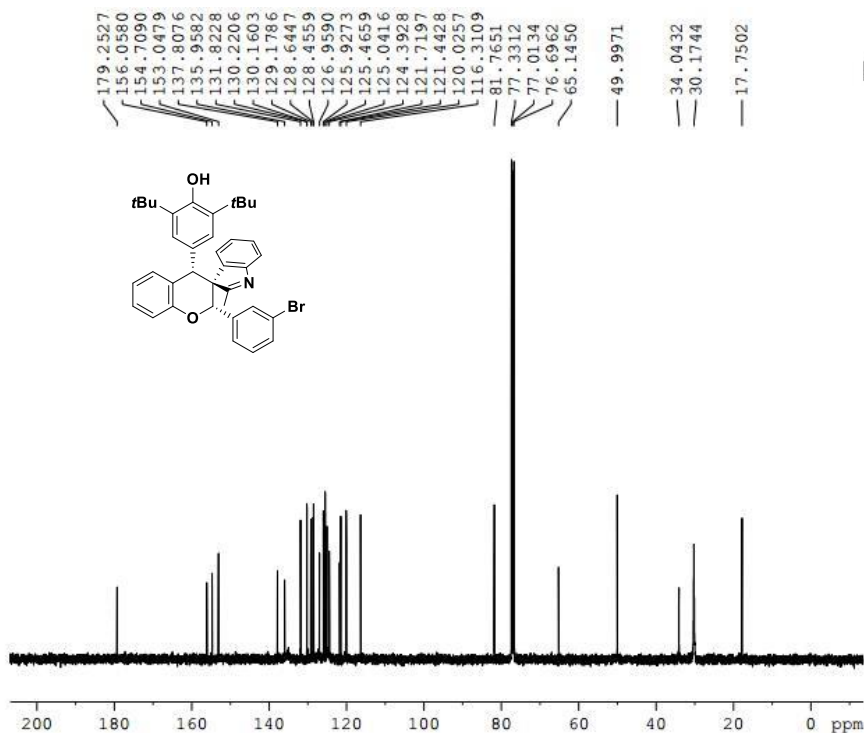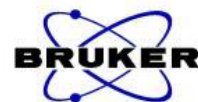

```

NAME      xqm18-3Br-1-C
EXPNO     1
PROCNO    1
Date_     20180423
Time      16.22
INSTRUM   spect
PROBHD    5 mm FAPBO BB-
PULPROG   zgpg30
TD         65536
SOLVENT   CDCl3
NS         247
DS         4
SWH        24038.461 Hz
FIDRES     0.366798 Hz
AQ         1.3631988 sec
RG         203
LW         20.800 usec
DE         6.50 usec
TE         302.2 K
D1         2.00000000 sec
D11        0.03000000 sec
TD0        1

===== CHANNEL f1 =====
NUC1       13C
P1         11.50 usec
PL1        -3.00 dB
PL1W       68.16146088 W
SFO1       100.6278593 MHz

===== CHANNEL f2 =====
CPDPRG2   waltz16
NUC2       1H
PCPD2     90.00 usec
PL2        -2.60 dB
PL12       13.88 dB
PL13       14.50 dB
PL2W       17.82643890 W
PL12W      0.40092635 W
PL13W      0.34758785 W
SFO2       400.1516006 MHz
SI         32768
SF         100.6177980 MHz
WDW        EM
SSB        0
LB         1.00 Hz
GB         0
PC         1.40
    
```

**2,6-di-tert-butyl-4-(2'-methyl-2-(3-nitrophenyl)spiro[chromane-3,3'-indol]-4-yl)phenol (3h)**

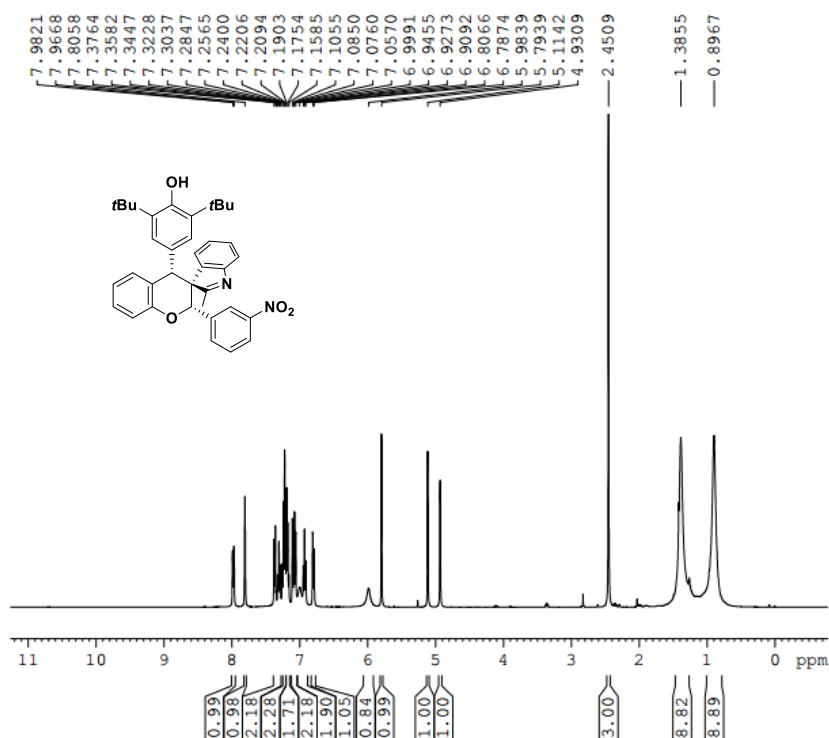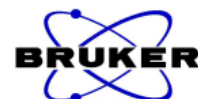

```

NAME      xqm170608
EXPNO    1
PROCNO   1
Date_    20171221
Time     11.05
INSTRUM  spect
PROBHD   5 mm PABBO BB-
PULPROG  zg30
TD        65536
SOLVENT  CDCl3
NS        8
DS        2
SWH       8223.685 Hz
FIDRES   0.125483 Hz
AQ        3.9846387 sec
RG        28.5
DM        60.800 usec
DE        6.50 usec
TE        291.8 K
D1        1.00000000 sec
TD0       1

===== CHANNEL f1 =====
NUC1      1H
P1        13.00 usec
PL1       -2.60 dB
PL1W      17.82643890 W
SFO1      400.1524711 MHz
SI        32768
SF        400.1500101 MHz
WDW       EM
SSB       0
LB        0.30 Hz
GB        0
PC        1.00
    
```

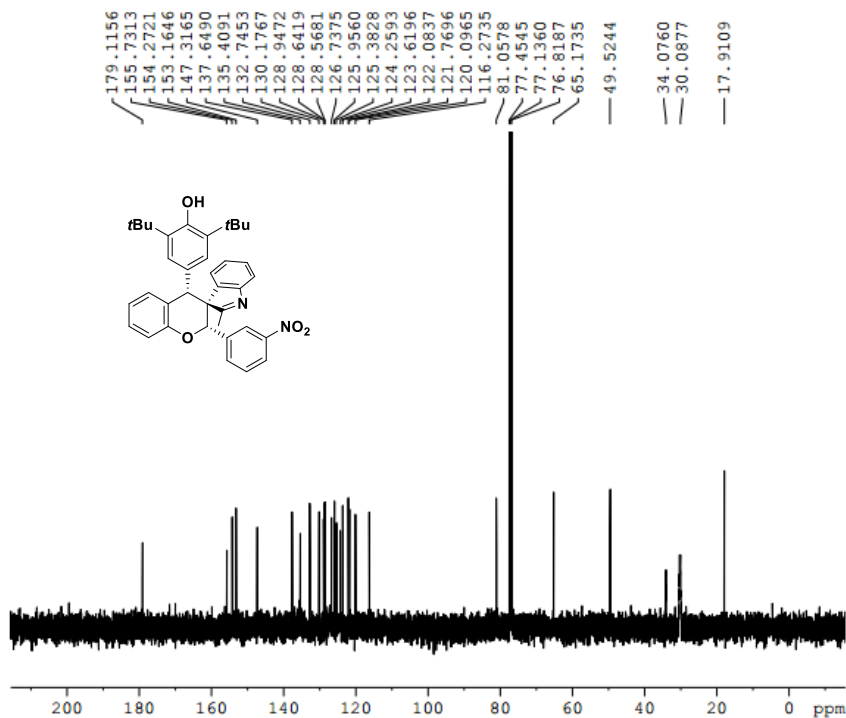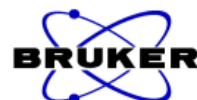

```

NAME      xqm170608-cl
EXPNO    1
PROCNO   1
Date_    20171221
Time     11.15
INSTRUM  spect
PROBHD   5 mm PABBO BB-
PULPROG  zgpg30
TD        65536
SOLVENT  CDCl3
NS        159
DS        4
SWH       24038.461 Hz
FIDRES   0.366798 Hz
AQ        1.3631988 sec
RG        203
DM        20.800 usec
DE        6.50 usec
TE        293.0 K
D1        2.00000000 sec
D11       0.03000000 sec
TD0       1

===== CHANNEL f1 =====
NUC1      13C
P1        11.50 usec
PL1       -3.00 dB
PL1W      68.16146088 W
SFO1      100.6278593 MHz

===== CHANNEL f2 =====
CPDPRG2  waltz16
NUC2      1H
PCPD2    90.00 usec
PL2       -2.60 dB
PL12     13.88 dB
PL13     14.50 dB
PL2W     17.82643890 W
PL12W    0.40092635 W
PL13W    0.34758785 W
SFO2     400.1514006 MHz
SI        32768
SF        100.6177980 MHz
WDW       EM
SSB       0
LB        1.00 Hz
GB        0
PC        1.40
    
```

**2,6-di-tert-butyl-4-(2'-methyl-2-(m-tolyl)spiro[chromane-3,3'-indol]-4-yl)phenol  
(3i)**

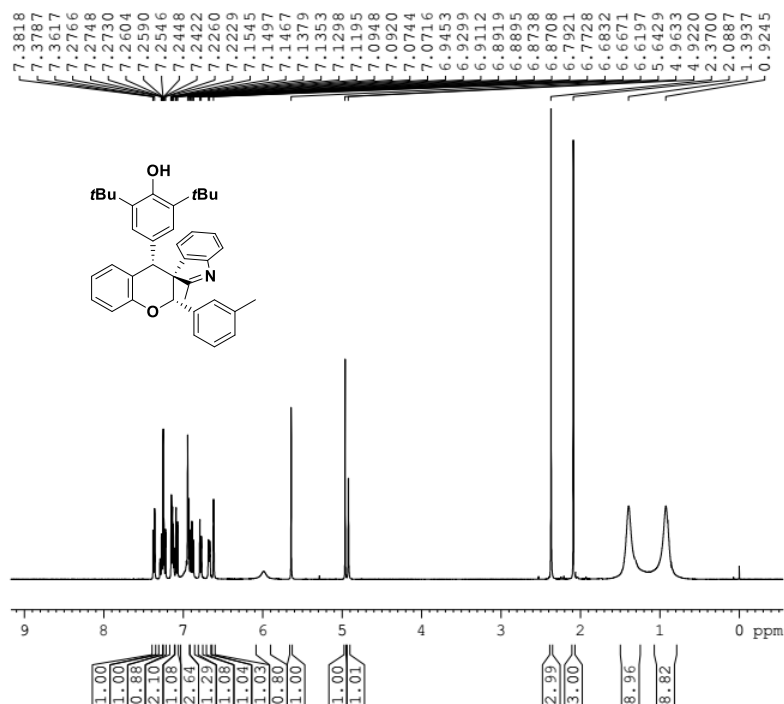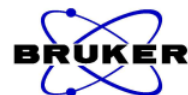

```

NAME      20170606-XQM170531-15
EXPNO    1
PROCNO   1
Date_    20170606
Time     17.59 h
INSTRUM  spect
PROBHD   Z108618_0670 (
PULPROG  zg30
TD        65536
SOLVENT  CDCl3
NS        8
DS        0
SWH       8012.820 Hz
FIDRES    0.244532 Hz
AQ         4.0894966 sec
RG         83.48
DW         62.400 usec
DE         6.50 usec
TE         297.5 K
D1         1.00000000 sec
TDO        1
SFO1      400.1324708 MHz
NUC1       1H
P1         14.33 usec
SI         65536
SF         400.1300118 MHz
WDW        EM
SSB        0
LB         0.30 Hz
GB         0
PC         1.00
    
```

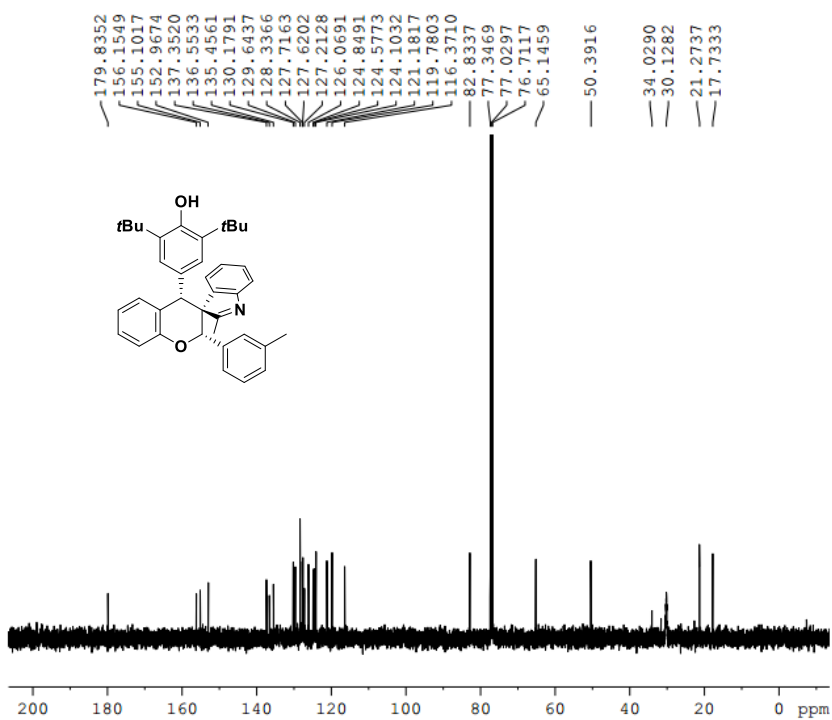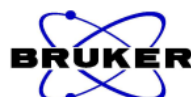

```

NAME      20170606-XQM170531-15
EXPNO    2
PROCNO   1
Date_    20170606
Time     18.05 h
INSTRUM  spect
PROBHD   Z108618_0670 (
PULPROG  zgpg30
TD        65536
SOLVENT  CDCl3
NS        55
DS        0
SWH       24038.461 Hz
FIDRES    0.733596 Hz
AQ         1.3631988 sec
RG         211.8
DW         20.800 usec
DE         6.50 usec
TE         298.0 K
D1         2.00000000 sec
D11        0.03000000 sec
TDO        1
SFO1      100.6228298 MHz
NUC1      13C
P1         9.43 usec
SI         32768
SF         100.6127690 MHz
WDW        EM
SSB        0
LB         1.00 Hz
GB         0
PC         1.40
    
```



**2,6-di-tert-butyl-4-(2-(3-methoxyphenyl)-2'-methylspiro[chromane-3,3'-indol]-4-yl)phenol (3j)**

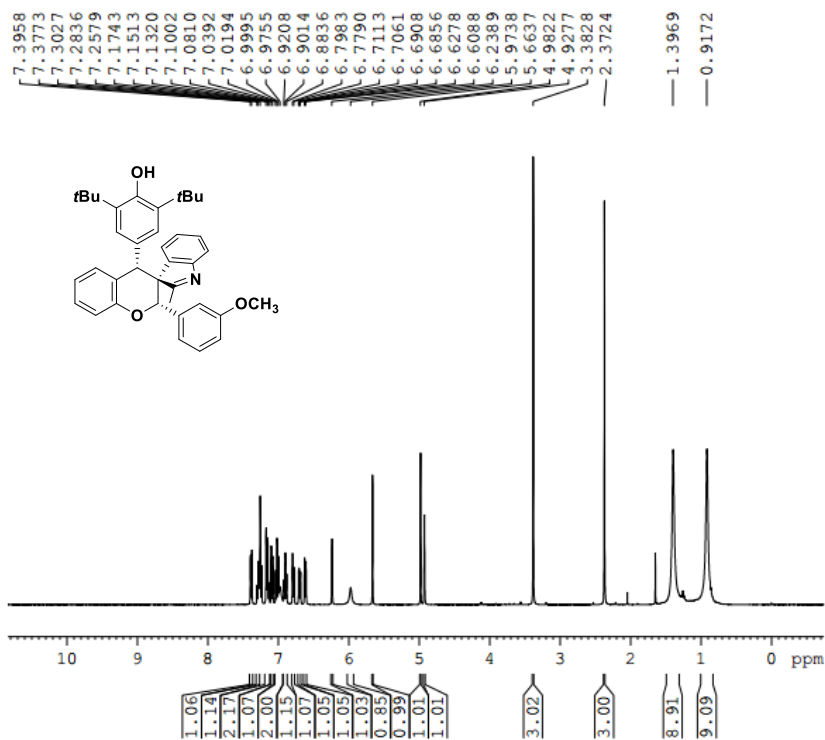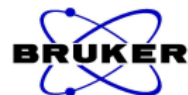

```

NAME      XQM1801226-3OCH3
EXPNO     1
PROCNO    1
Date_     20180126
Time      15.21
INSTRUM   spect
PROBHD    5 mm PABBO BB-
PULPROG   zg30
TD         65536
SOLVENT   CDCl3
NS         8
DS         2
SWH        8223.685 Hz
FIDRES     0.125483 Hz
AQ         3.9846387 sec
RG         90.5
DM         60.800 usec
DE         6.50 usec
TE         290.2 K
D1         1.00000000 sec
TD0        1

===== CHANNEL f1 =====
NUC1       1H
P1         13.00 usec
PL1        -2.60 dB
PL1W       18.28352737 W
SFO1       400.1524711 MHz
SI         32768
SF         400.1500097 MHz
WDW        EM
SSB        0
LB         0.30 Hz
GB         0
PC         1.00
    
```

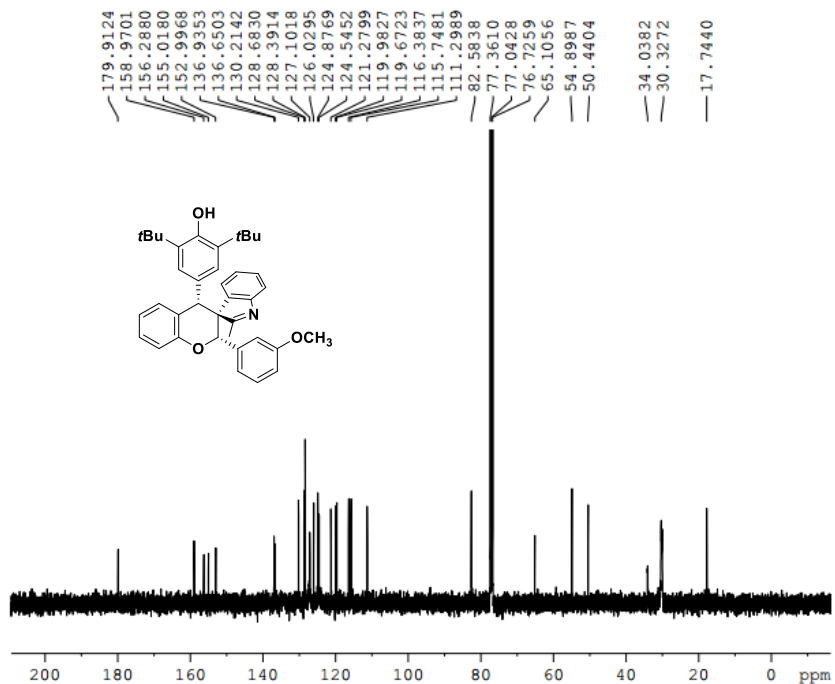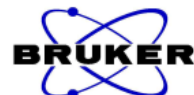

```

NAME      XQM180126-3OCH3-C
EXPNO     1
PROCNO    1
Date_     20180126
Time      17.19
INSTRUM   spect
PROBHD    5 mm PABBO BB-
PULPROG   zgpg30
TD         65536
SOLVENT   CDCl3
NS         176
DS         4
SWH        24038.461 Hz
FIDRES     0.366798 Hz
AQ         1.3631988 sec
RG         203
DM         20.800 usec
DE         6.50 usec
TE         294.8 K
D1         2.00000000 sec
D11        0.03000000 sec
TD0        1

===== CHANNEL f1 =====
NUC1       13C
P1         11.50 usec
PL1        -3.00 dB
PL1W       68.16146088 W
SFO1       100.6278593 MHz

===== CHANNEL f2 =====
CPDPRG2   waltz16
NUC2       1H
PCPD2     90.00 usec
PL2        -2.60 dB
PL12       13.88 dB
PL13       14.50 dB
PL12W     17.82643890 W
PL12W     0.40092635 W
PL13W     0.34758785 W
SFO2       400.1516006 MHz
SI         32768
SF         100.6177980 MHz
WDW        EM
SSB        0
LB         1.00 Hz
GB         0
PC         1.40
    
```

**2,6-di-tert-butyl-4-(2-(4-fluorophenyl)-2'-methylspiro[chromane-3,3'-indol]-4-yl)phenol (3k)**

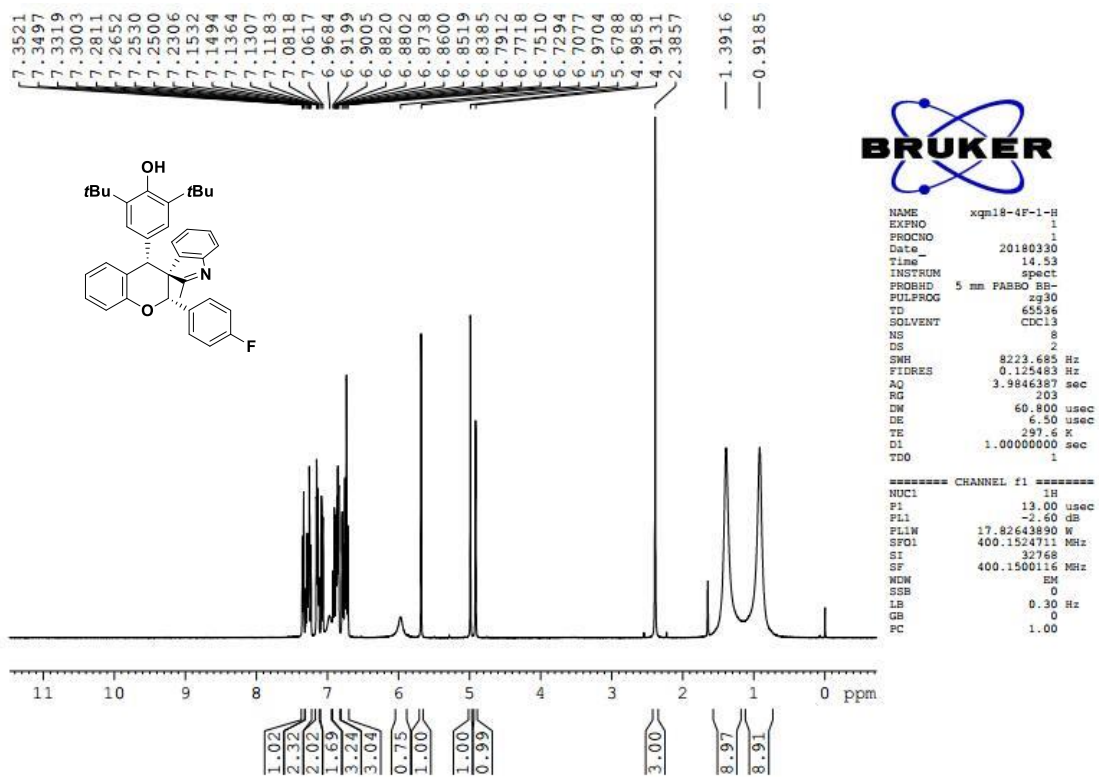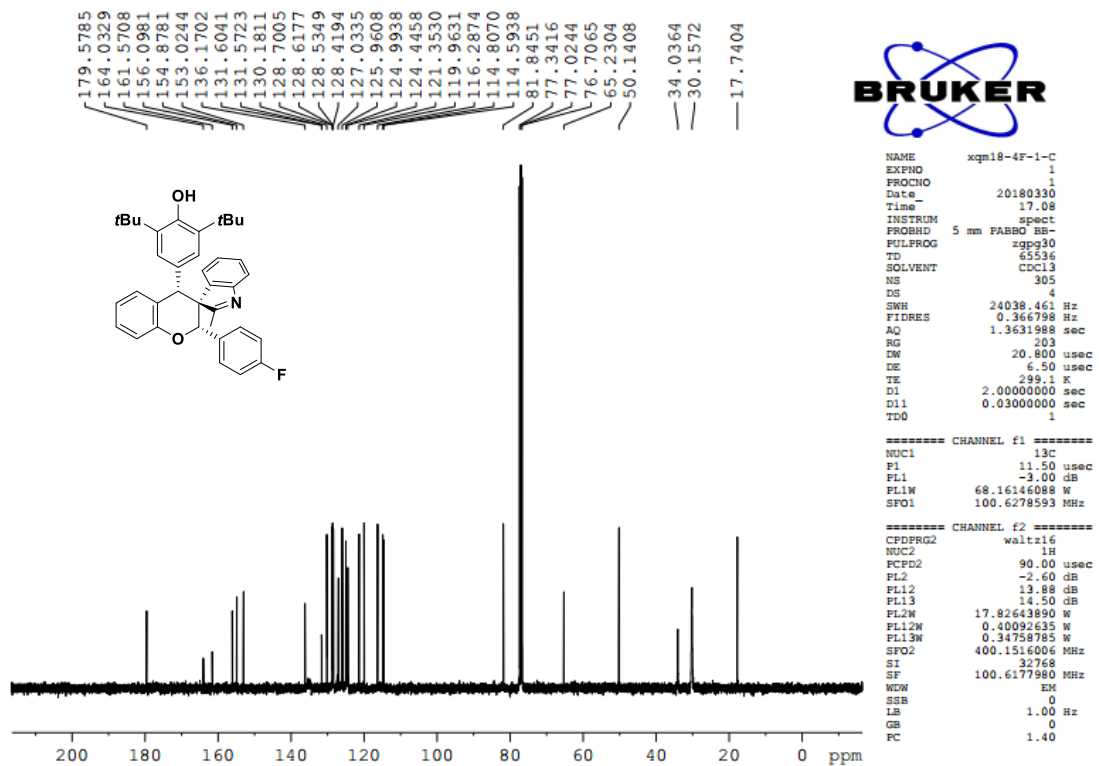

**2,6-di-tert-butyl-4-(2-(4-chlorophenyl)-2'-methylspiro[chromane-3,3'-indol]-4-yl)phenol (3l)**

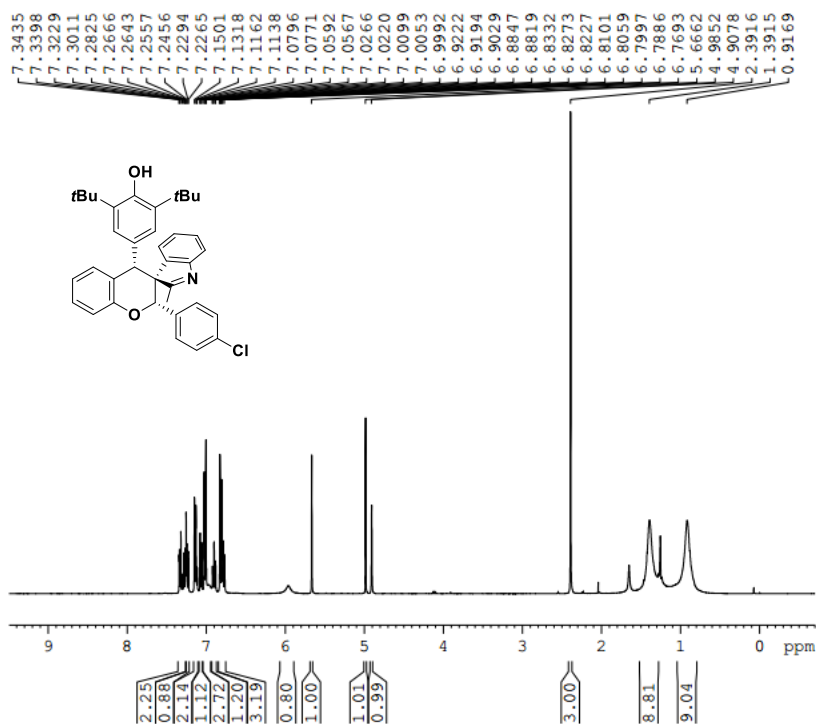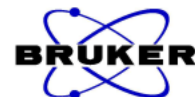

```

NAME      20170627-XQM170531-14
EXPNO    3
PROCNO   1
Date_    20170627
Time     17.22 h
INSTRUM  spect
PROBHD   Z108618_0670 (
PULPROG  zg30
TD       65536
SOLVENT  CDCl3
NS       8
DS       0
SWH      8012.820 Hz
FIDRES   0.244532 Hz
AQ       4.0894966 sec
RG       76.1
DW       62.400 usec
DE       6.50 usec
TE       296.9 K
D1       1.00000000 sec
TDO      1
SFO1     400.1324708 MHz
NUC1     1H
FI       14.33 usec
SI       65536
SF       400.1300114 MHz
WDW      EM
SSB      0
LB       0.30 Hz
GB       0
PC       1.00
    
```

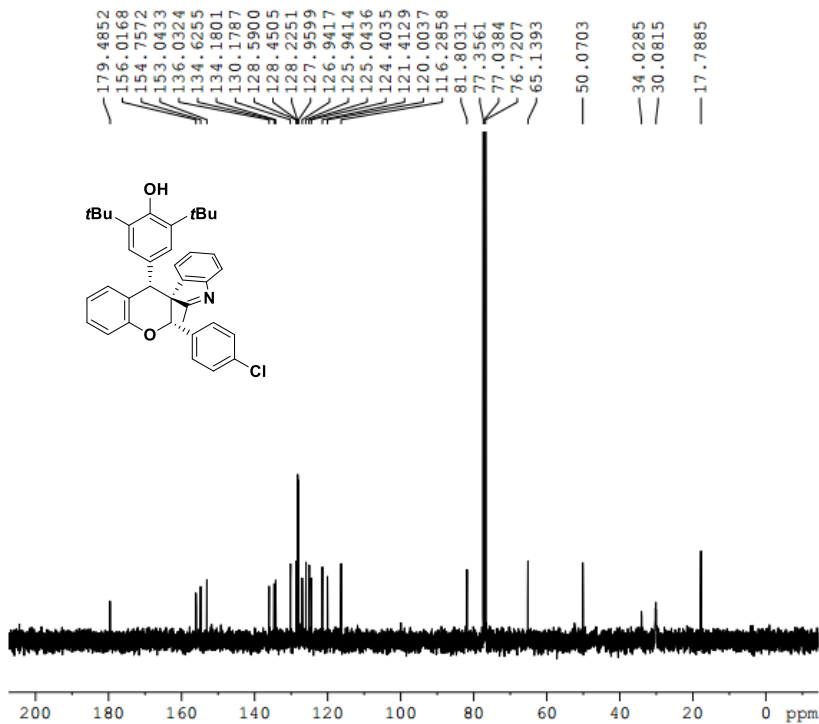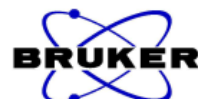

```

NAME      20170627-XQM170531-14
EXPNO    2
PROCNO   1
Date_    20170627
Time     17.18 h
INSTRUM  spect
PROBHD   Z108618_0670 (
PULPROG  zgpg30
TD       65536
SOLVENT  CDCl3
NS       26
DS       0
SWH      24038.461 Hz
FIDRES   0.733596 Hz
AQ       1.3631988 sec
RG       211.8
DW       20.800 usec
DE       6.50 usec
TE       297.2 K
D1       2.00000000 sec
D11      0.03000000 sec
TDO      1
SFO1     100.6228298 MHz
NUC1     13C
FI       9.43 usec
SI       32768
SF       100.6127690 MHz
WDW      EM
SSB      0
LB       1.00 Hz
GB       0
PC       1.40
    
```

**4-(2-(4-bromophenyl)-2'-methylspiro[chromane-3,3'-indol]-4-yl)-2,6-di-tert-butyl phenol (3m)**

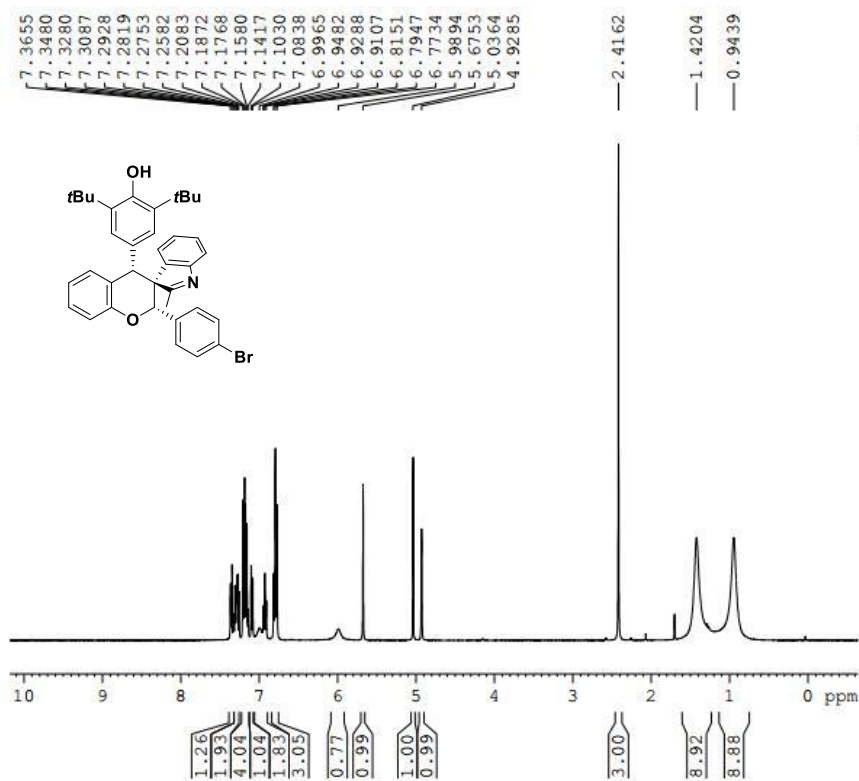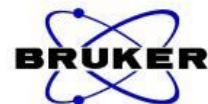

```

NAME      xqm18-4Br-1-H
EXPNO     1
PROCNO    1
Date_     20180330
Time      14.49
INSTRUM   spect
PROBHD    5 mm F4BBO BB-
PULPROG   zg30
TD         65536
SOLVENT   CDCl3
NS         8
DS         2
SWH       8223.685 Hz
FIDRES    0.125483 Hz
AQ         3.9846387 sec
RG         101
DM         60.800 usec
DE         6.50 usec
TE         297.8 K
D1         1.00000000 sec
TD0        1

===== CHANNEL f1 =====
NUC1      1H
P1        13.00 usec
PL1       -2.60 dB
PL1W      17.82643890 W
SFO1      400.1524711 MHz
SI         32768
SF         400.1500000 MHz
WDW        EM
SSB        0
LB         0.30 Hz
GB         0
PC         1.00
    
```

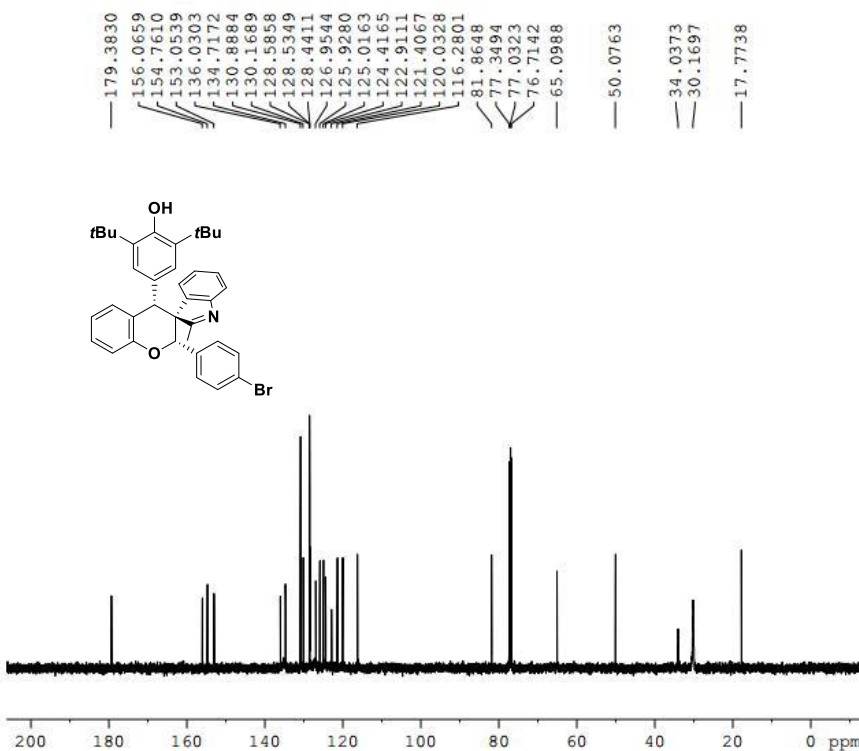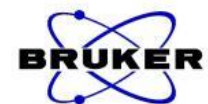

```

NAME      xqm18-4Br-1-C
EXPNO     1
PROCNO    1
Date_     20180330
Time      17.14
INSTRUM   spect
PROBHD    5 mm F4BBO BB-
PULPROG   zgpg30
TD         65536
SOLVENT   CDCl3
NS         75
DS         4
SWH       24038.461 Hz
FIDRES    0.366798 Hz
AQ         1.3631988 sec
RG         203
DM         20.800 usec
DE         6.50 usec
TE         299.1 K
D1         2.00000000 sec
D11        0.03000000 sec
TD0        1

===== CHANNEL f1 =====
NUC1      13C
P1        11.50 usec
PL1       -3.00 dB
PL1W      68.16146088 W
SFO1      100.6278593 MHz

===== CHANNEL f2 =====
CPDPRG2   waltz16
NUC2       1H
PCPD2     90.00 usec
PL2       12.60 dB
PL12      13.88 dB
PL13      14.50 dB
PL2W      17.82643890 W
PL12W     0.40092635 W
PL13W     0.34758785 W
SFO2      400.1516006 MHz
SI         32768
SF         100.6177980 MHz
WDW        EM
SSB        0
LB         1.00 Hz
GB         0
PC         1.40
    
```

**4-(4-(3,5-di-tert-butyl-4-hydroxyphenyl)-2'-methylspiro[chromane-3,3'-indol]-2-yl)benzonitrile (3n)**

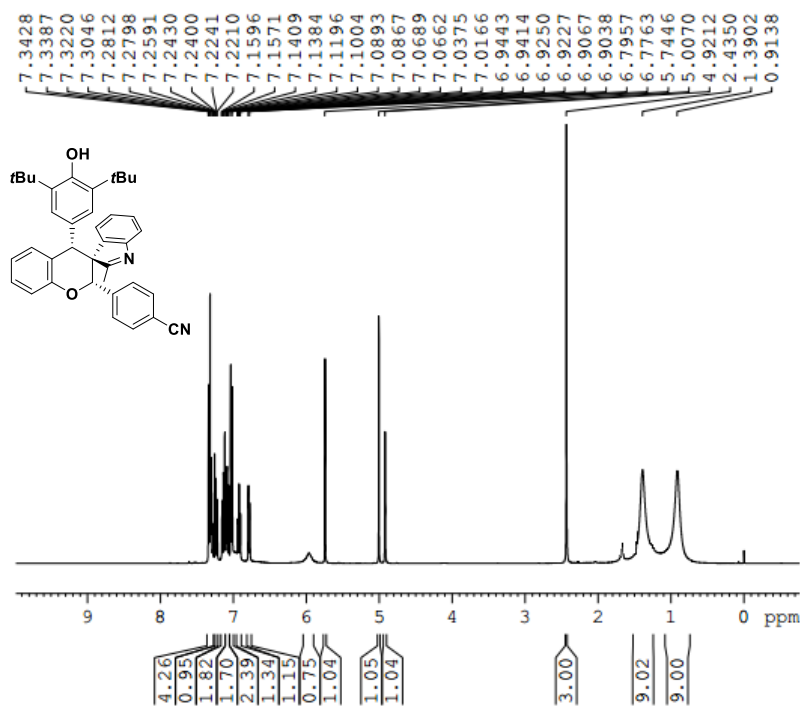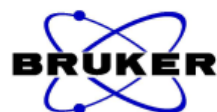

```

NAME      20170606-XQM170525-5
EXPNO     1
PROCNO    1
Date_     20170606
Time      17.26 h
INSTRUM   spect
PROBHD    Z108618_0670 (
FULPROG   zgpg30
TD         65536
SOLVENT   CDCl3
NS         8
DS         0
SWH       8012.820 Hz
FIDRES    0.244533 Hz
AQ         4.0894966 sec
RG         67.27
DW         62.400 usec
DE         6.50 usec
TE         297.5 K
D1         1.00000000 sec
D11        1
TDO        400.1324708 MHz
NUC1       1H
P1         14.33 usec
SI         65536
SF         400.1300100 MHz
WDW        EM
SSB        0
LB         0.30 Hz
GB         0
PC         1.00
    
```

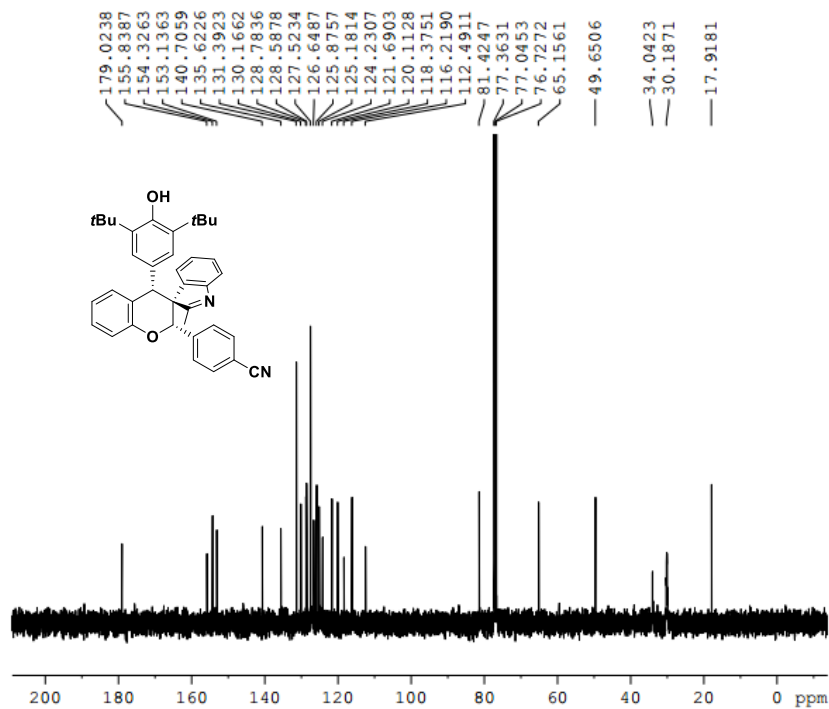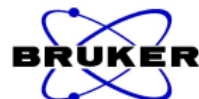

```

NAME      20170606-XQM170525-5
EXPNO     2
PROCNO    1
Date_     20170606
Time      17.32 h
INSTRUM   spect
PROBHD    Z108618_0670 (
FULPROG   zgpg30
TD         65536
SOLVENT   CDCl3
NS         40
DS         0
SWH       24038.461 Hz
FIDRES    0.733596 Hz
AQ         1.3631988 sec
RG         211.8
DW         20.800 usec
DE         6.50 usec
TE         298.0 K
D1         2.00000000 sec
D11        0.03000000 sec
TDO        100.6228298 MHz
NUC1       13C
P1         9.43 usec
SI         32768
SF         100.6127690 MHz
WDW        EM
SSB        0
LB         1.00 Hz
GB         0
PC         1.40
    
```

2,6-di-tert-butyl-4-(2'-methyl-2-(4-nitrophenyl)spiro[chromane-3,3'-indol]-4-yl)phenol (3o)

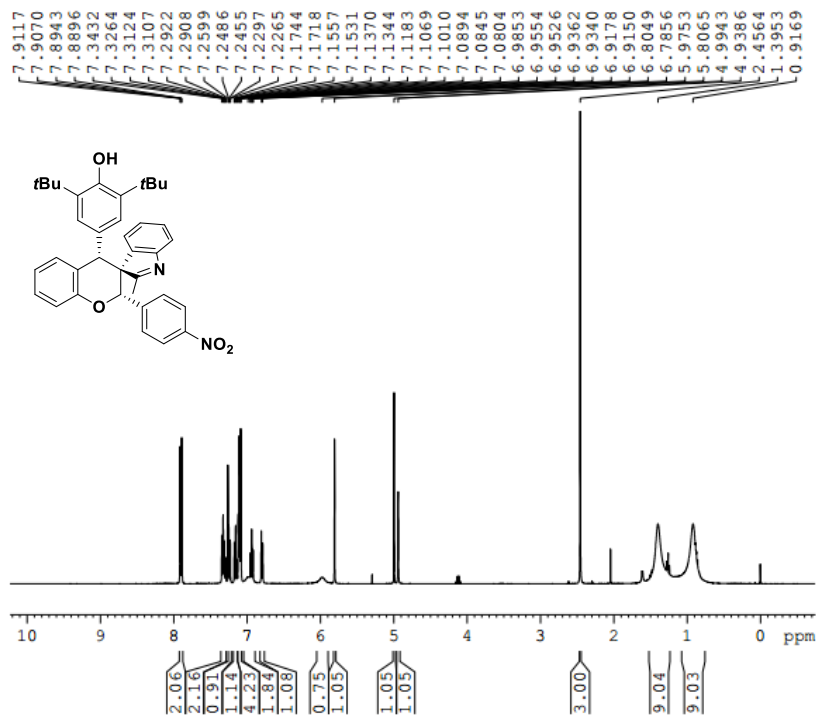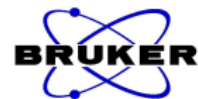

```

NAME      20170606-XQM170525-8
EXPNO    1
PROCNO   1
Date_    20170606
Time     17.05 h
INSTRUM  spect
PROBHD   Z108618_0670 (
PULPROG  zg30
TD        65536
SOLVENT  CDCl3
NS        8
DS        0
SWH      8012.820 Hz
FIDRES   0.244532 Hz
AQ        4.0894966 sec
RG        95.47
DW        62.400 usec
DE        6.50 usec
TE        297.7 K
D1        1.00000000 sec
TDO       1
SFO1     400.1324768 MHz
NUC1      1H
P1        14.33 usec
SI        65536
SF        400.1300096 MHz
WDW       EM
SGB       0
LB        0.30 Hz
GB        0
PC        1.00
    
```

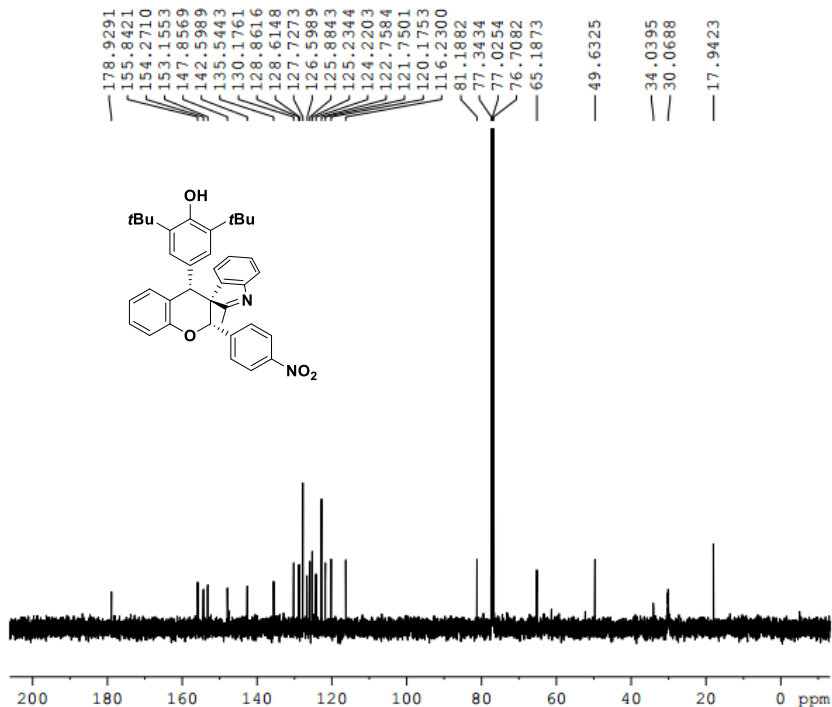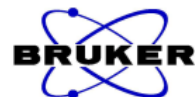

```

NAME      20170606-XQM170525-8
EXPNO    2
PROCNO   1
Date_    20170606
Time     17.10 h
INSTRUM  spect
PROBHD   Z108618_0670 (
PULPROG  zgpg30
TD        65536
SOLVENT  CDCl3
NS        45
DS        0
SWH      24038.461 Hz
FIDRES   0.733596 Hz
AQ        1.563198 sec
RG        211.8
DW        20.800 usec
DE        6.50 usec
TE        298.0 K
D1        2.00000000 sec
D11      0.03000000 sec
TDO       1
SFO1     100.6228298 MHz
NUC1      13C
P1        9.43 usec
SI        32768
SF        100.6127690 MHz
WDW       EM
SGB       0
LB        1.00 Hz
GB        0
PC        1.40
    
```

**2,6-di-tert-butyl-4-(2'-methyl-2-(4-(trifluoromethyl)phenyl)spiro[chromane-3,3'-indol]-4-yl)phenol (3p)**

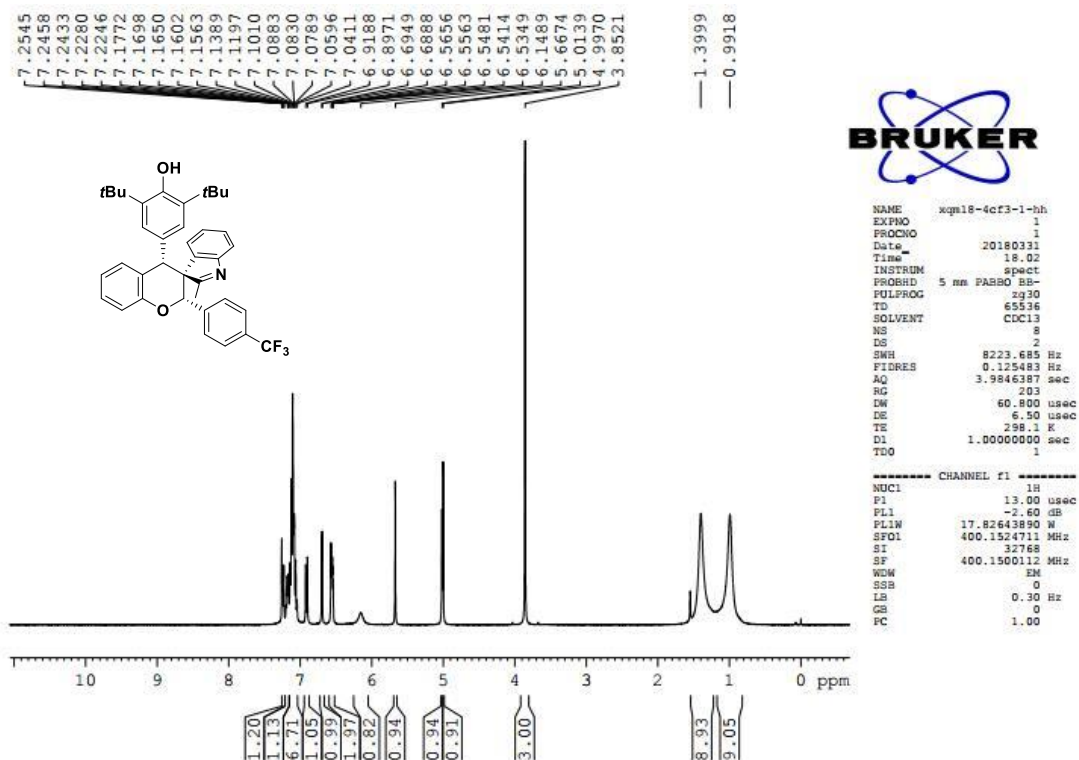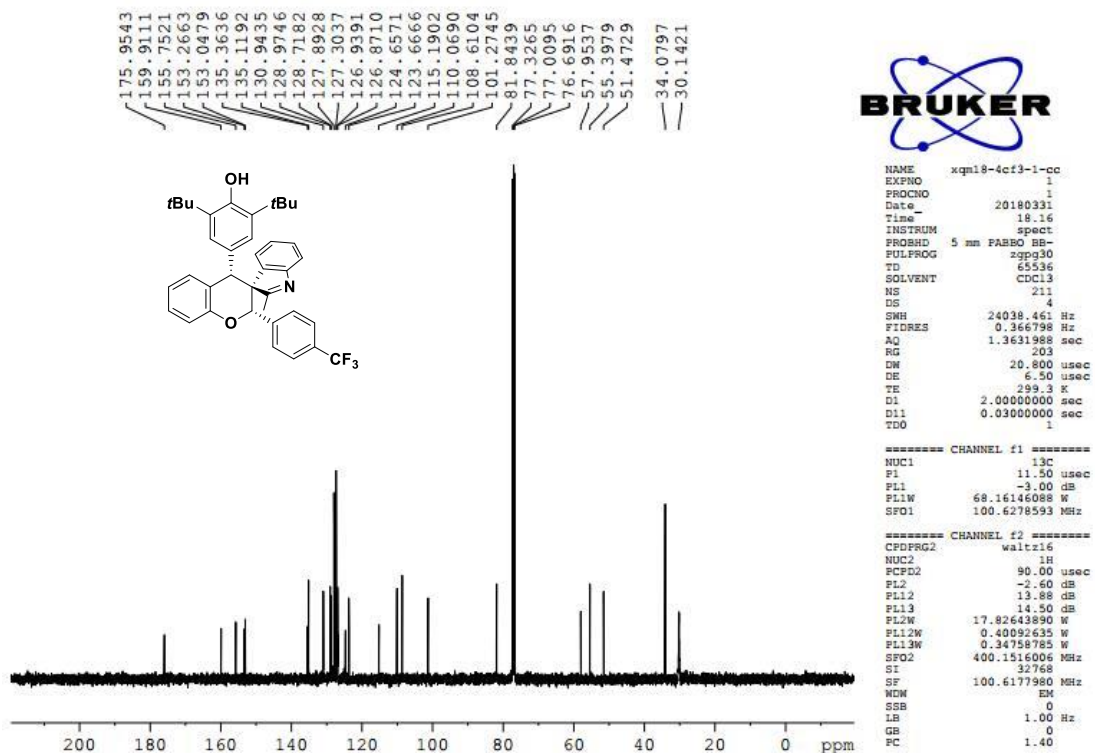

2,6-di-tert-butyl-4-(2'-methyl-2-(p-tolyl)spiro[chromane-3,3'-indol]-4-yl)phenol  
(3q)

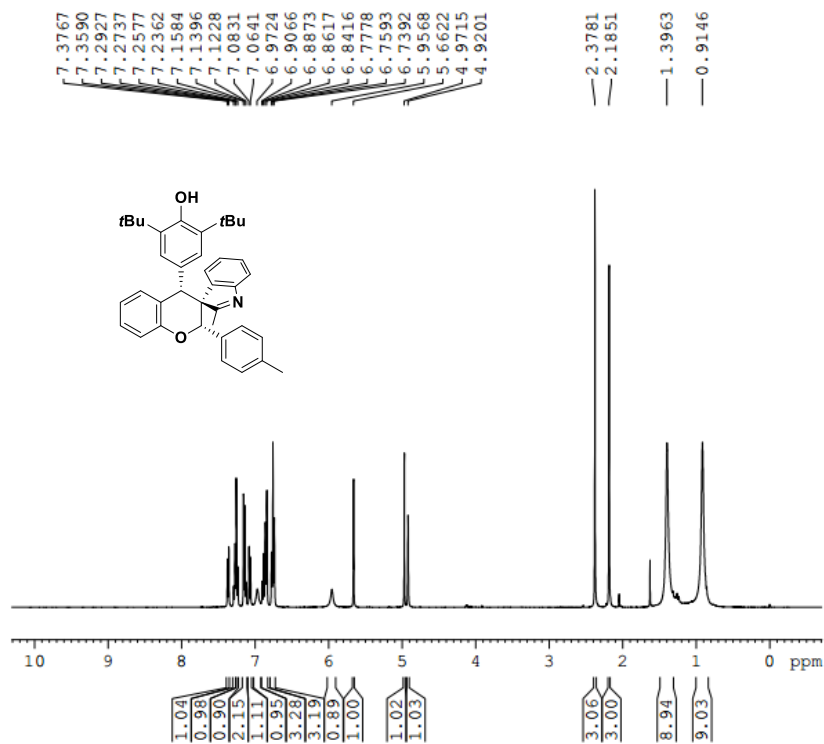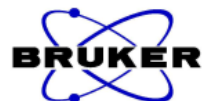

```

NAME      XQM1801226-4CH3
EXPNO    1
PROCNO   1
Date_    20180126
Time     15.16
INSTRUM  spect
PROBHD   5 mm PABBO BB-
PULPROG  zg30
TD        65536
SOLVENT  CDCl3
NS        8
DS        2
SWH      8223.685 Hz
FIDRES   0.125483 Hz
AQ        3.9846387 sec
RG        90.5
DW        60.800 usec
DE        6.50 usec
TE        290.5 K
D1        1.0000000 sec
TD0       1
  
```

```

===== CHANNEL f1 =====
NUC1     1H
P1       13.00 usec
PL1      -2.60 dB
PL1W     18.28352737 W
SFO1     400.1524711 MHz
SI       32768
SF       400.1500100 MHz
WDW      EM
SSB      0
LB       0.30 Hz
GB       0
PC       1.00
  
```

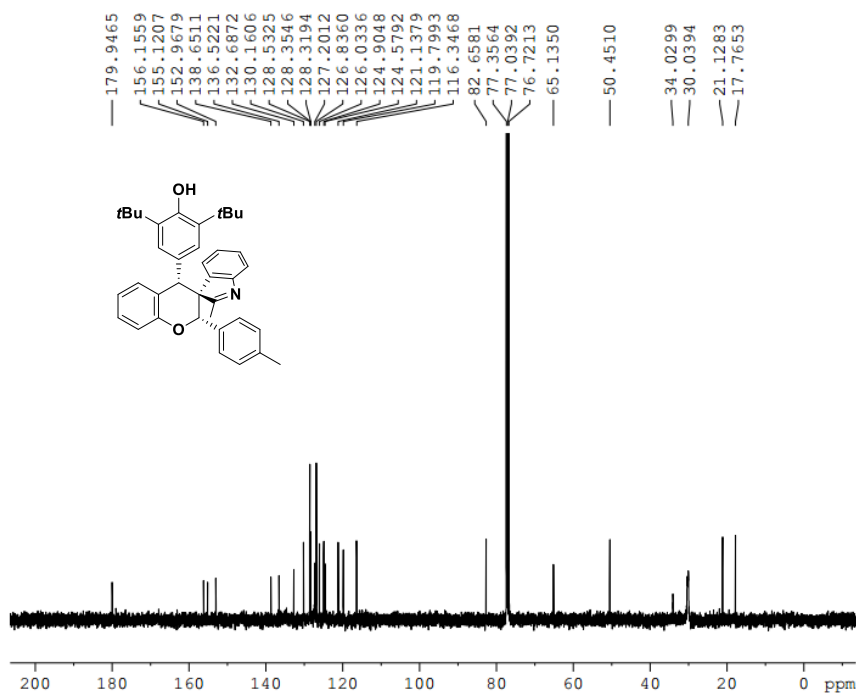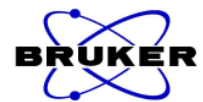

```

NAME      xqm180126-4CH3-c
EXPNO    1
PROCNO   1
Date_    20180126
Time     17.01
INSTRUM  spect
PROBHD   5 mm PABBO BB-
PULPROG  zgpg30
TD        65536
SOLVENT  CDCl3
NS        195
DS        4
SWH      24038.461 Hz
FIDRES   0.366798 Hz
AQ        1.3631988 sec
RG        203
DW        20.800 usec
DE        6.50 usec
TE        294.5 K
D1        2.0000000 sec
D11      0.0300000 sec
TD0       1
  
```

```

===== CHANNEL f1 =====
NUC1     13C
P1       11.50 usec
PL1      -3.00 dB
PL1W     68.16146088 W
SFO1     100.6278593 MHz
  
```

```

===== CHANNEL f2 =====
CPDPRG2  waltz16
NUC2     1H
PCPD2    90.00 usec
PL2      -2.60 dB
PL12     13.88 dB
PL13     14.50 dB
PL2W     17.82643890 W
PL12W    0.40092635 W
PL13W    0.34758785 W
SFO2     400.1516006 MHz
SI       32768
SF       100.6177980 MHz
WDW      EM
SSB      0
LB       1.00 Hz
GB       0
PC       1.40
  
```



2,6-di-tert-butyl-4-(2-(4-methoxyphenyl)-2'-methylspiro[chromane-3,3'-indol]-4-yl)phenol (3r)

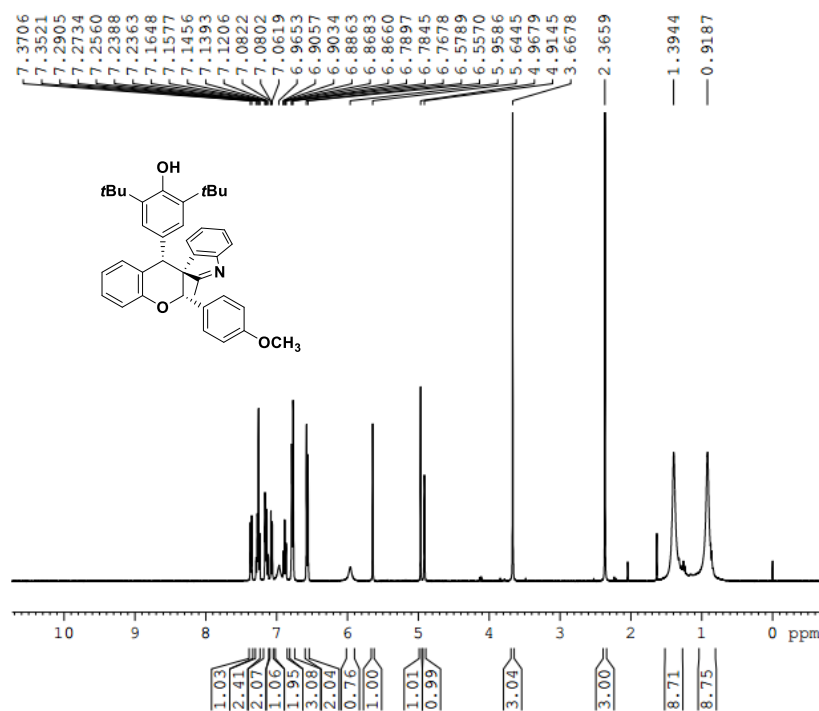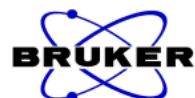

```

NAME      xqm180127-4OCH3
EXPNO     1
PROCNO    1
Date_     20180127
Time      16.32
INSTRUM   spect
PROBHD    5 mm PABBO BBI-
PULPROG   zg30
TD         65536
SOLVENT   CDCl3
NS         8
DS         2
SWH        8223.685 Hz
FIDRES     0.125483 Hz
AQ         3.9846387 sec
RG         203
DW         60.800 usec
DE         6.50 usec
TE         294.7 K
D1         1.00000000 sec
TDO        1

===== CHANNEL f1 =====
NUC1      1H
F1        13.00 usec
PL1       -2.60 dB
PL1W      17.82643890 W
SFO1      400.1524711 MHz
SI         32768
SF         400.1500105 MHz
WDW        EM
SSB        0
LB         0.30 Hz
GB         0
PC         1.00
    
```

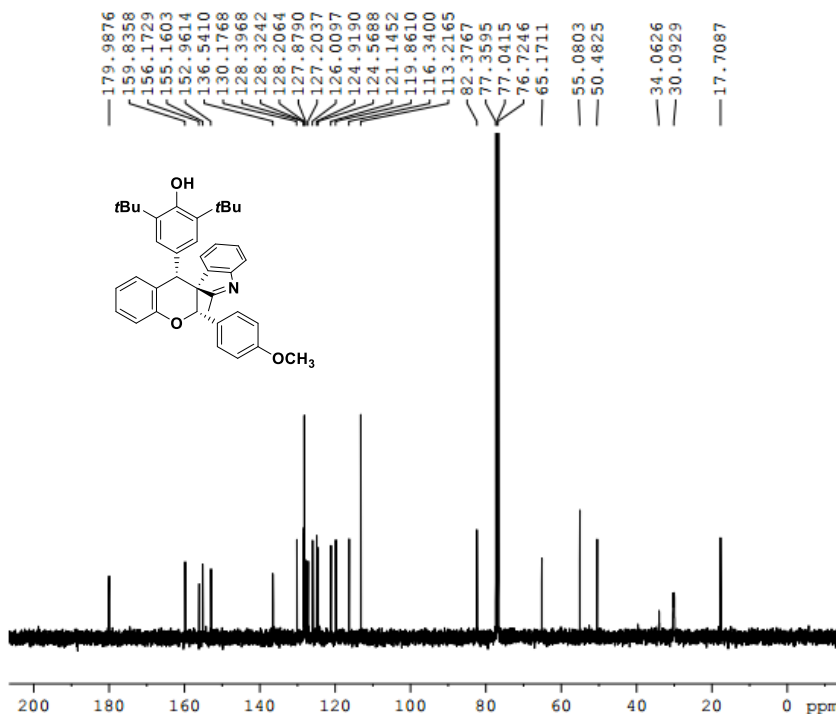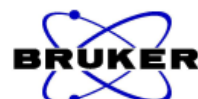

```

NAME      xqm180127-4OCH3-c
EXPNO     1
PROCNO    1
Date_     20180127
Time      17.19
INSTRUM   spect
PROBHD    5 mm PABBO BBI-
PULPROG   zgpg30
TD         65536
SOLVENT   CDCl3
NS         103
DS         4
SWH        24038.461 Hz
FIDRES     0.366798 Hz
AQ         1.3631988 sec
RG         203
DW         20.800 usec
DE         6.50 usec
TE         295.9 K
D1         2.00000000 sec
D11        0.03000000 sec
TDO        1

===== CHANNEL f1 =====
NUC1      13C
F1        11.50 usec
PL1       -3.00 dB
PL1W      68.16146088 W
SFO1      100.6278593 MHz

===== CHANNEL f2 =====
CPDPRG2   waltz16
NUC2      1H
PCPD2     90.00 usec
PL2       -2.60 dB
PL12      13.88 dB
PL13      14.50 dB
PL2W      17.82643890 W
PL12W     0.40092635 W
PL13W     0.34758785 W
SFO2      400.1516006 MHz
SI         32768
SF         100.6177980 MHz
WDW        EM
SSB        0
LB         1.00 Hz
GB         0
PC         1.40
    
```

2,6-di-tert-butyl-4-(2'-methyl-2-(naphthalen-2-yl)spiro[chromane-3,3'-indol]-4-yl)phenol (3s)

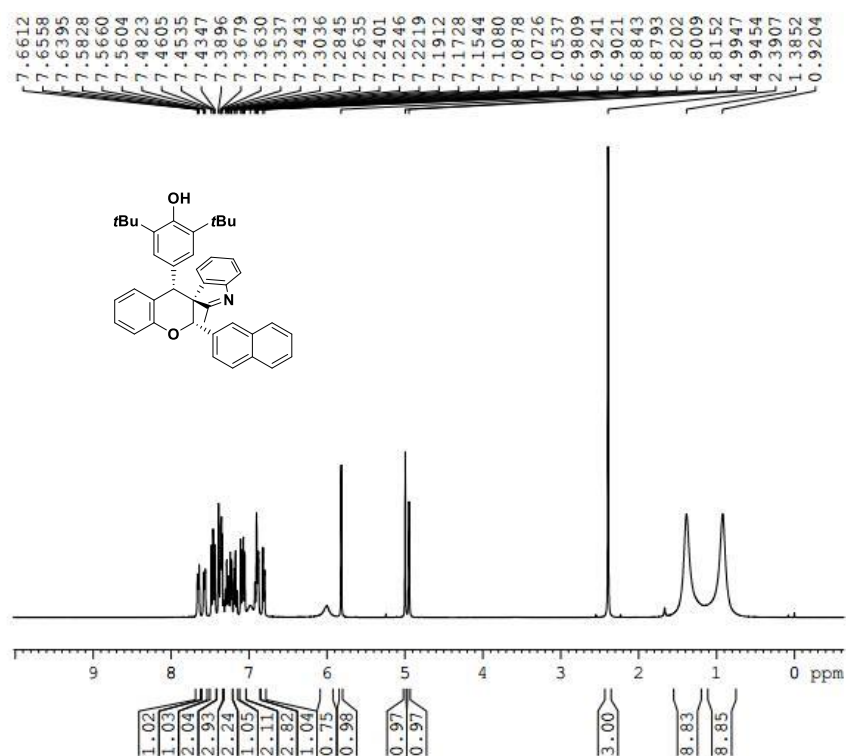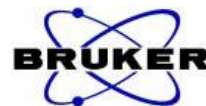

```

NAME      xqm18-2nai-1
EXPNO     1
PROCNO    1
Date_     20180423
Time      16.01
INSTRUM   spect
PROBHD    5 mm PABBO BB-
PULPROG   zg30
TD         65536
SOLVENT   CDCl3
NS         8
DS         2
SWH       8223.685 Hz
FIDRES    0.125483 Hz
AQ         3.9846387 sec
RG         101
DM         60.800 usec
DE         6.50 usec
TE         300.9 K
D1         1.00000000 sec
TDO        1

===== CHANNEL f1 =====
NUC1      1H
P1         13.00 usec
PL1        -2.60 dB
PL1W      17.82643890 W
SFO1      400.1524711 MHz
SI         32768
SF         400.1500224 MHz
WDW        EM
SSB        0
LB         0.30 Hz
GB         0
PC         1.00
    
```

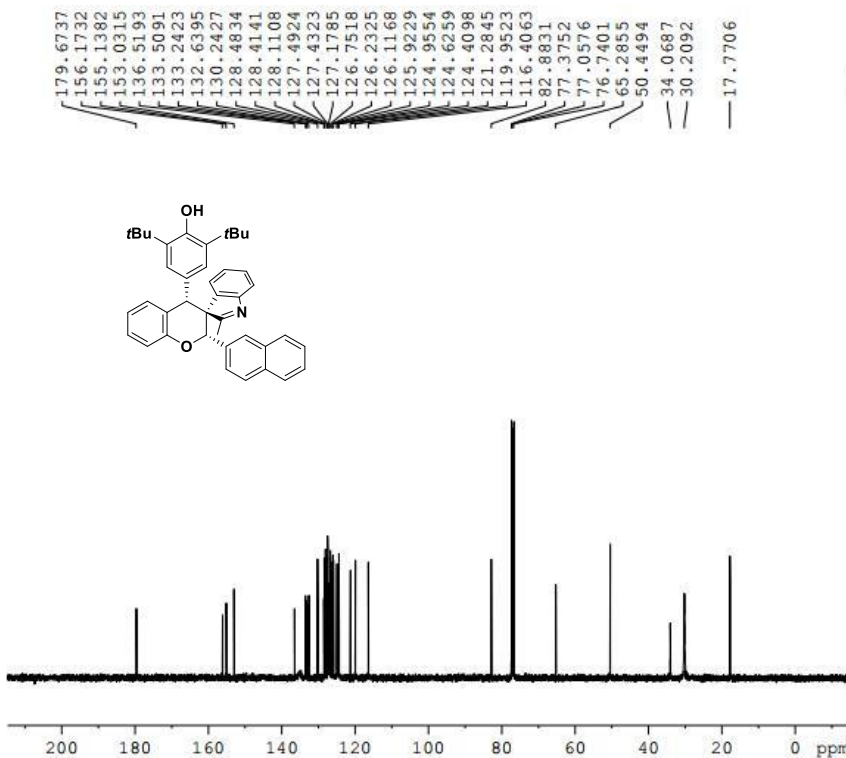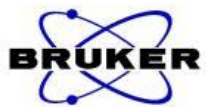

```

NAME      xqm18-2nai-1-C
EXPNO     1
PROCNO    1
Date_     20180423
Time      16.33
INSTRUM   spect
PROBHD    5 mm PABBO BB-
PULPROG   zgpg30
TD         65536
SOLVENT   CDCl3
NS         135
DS         4
SWH       24038.461 Hz
FIDRES    0.366798 Hz
AQ         1.3631988 sec
RG         203
DM         20.800 usec
DE         6.50 usec
TE         302.2 K
D1         2.00000000 sec
D11        0.03000000 sec
TDO        1

===== CHANNEL f1 =====
NUC1      13C
P1         11.50 usec
PL1        -3.00 dB
PL1W      68.16146088 W
SFO1      100.6278593 MHz

===== CHANNEL f2 =====
CPDPRG2   waltz16
NUC2      1H
PCPD2     90.00 usec
PL2        -2.60 dB
PL12      13.88 dB
PL13      14.50 dB
PL2W      17.82643890 W
PL12W     0.40092635 W
PL13W     0.34758795 W
SFO2      400.1516006 MHz
SI         32768
SF         100.6177980 MHz
WDW        EM
SSB        0
LB         1.00 Hz
GB         0
PC         1.40
    
```

2,6-di-tert-butyl-4-(2'-methyl-2-(3,4,5-trimethoxyphenyl)spiro[chromane-3,3'-indol]-4-yl)phenol (3t)

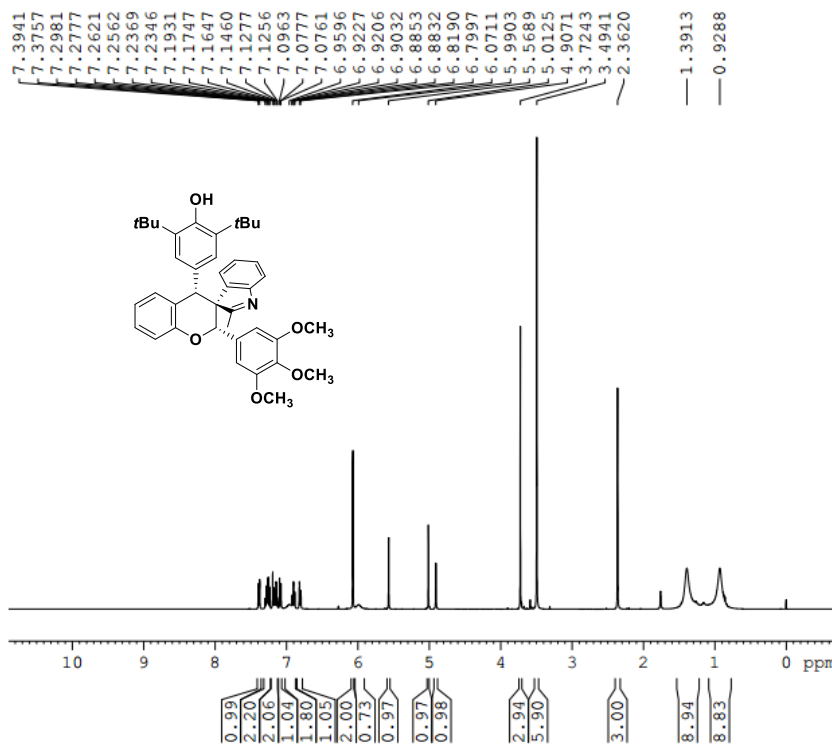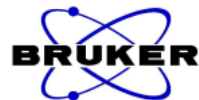

```

NAME      xqm180507-3.4.5-och3-1
EXPNO    2
PROCNO   1
Date_    20180507
Time     19.25
INSTRUM  spect
PROBHD   5 mm PABBO BB-
PULPROG  zg30
TD       65536
SOLVENT  CDCl3
NS       8
DS       2
SWH      8223.685 Hz
FIDRES   0.125483 Hz
AQ       3.9846387 sec
RG       71.8
DW       60.800 usec
DE       6.50 usec
TE       300.0 K
D1       1.0000000 sec
D11      1
TDO      1

===== CHANNEL f1 =====
NUC1     1H
P1       13.00 usec
PL1      -2.60 dB
PL1W    17.82643890 W
SFO1    400.1524711 MHz
SI       32768
SF       400.1500080 MHz
WDW      EM
SSB      0
LB       0.30 Hz
GB       0
PC       1.00
    
```

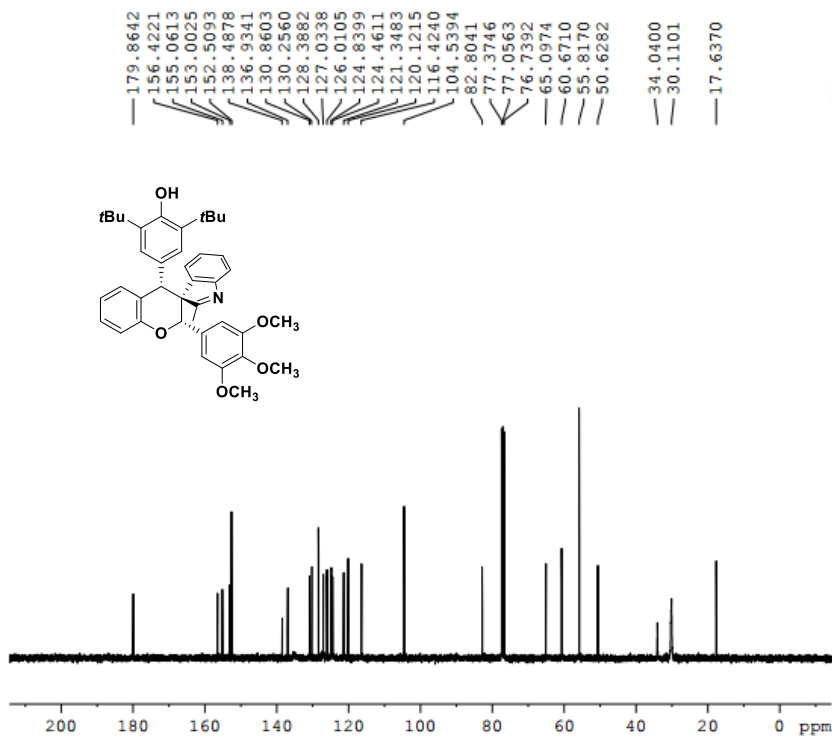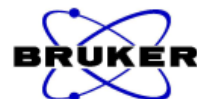

```

NAME      xqm180507-3.4.5-och3-1-c
EXPNO    1
PROCNO   1
Date_    20180507
Time     18.46
INSTRUM  spect
PROBHD   5 mm PABBO BB-
PULPROG  zgpg30
TD       65536
SOLVENT  CDCl3
NS       116
DS       4
SWH      24038.461 Hz
FIDRES   0.366798 Hz
AQ       1.3631988 sec
RG       203
DW       20.800 usec
DE       6.50 usec
TE       301.2 K
D1       2.0000000 sec
D11      0.0300000 sec
TDO      1

===== CHANNEL f1 =====
NUC1     13C
P1       11.50 usec
PL1      -3.00 dB
PL1W    68.16146088 W
SFO1    100.6276593 MHz

===== CHANNEL f2 =====
CPDPRG2  waltz16
NUC2     1H
PCPD2    90.00 usec
PL2      -2.60 dB
PL12    13.88 dB
PL13    14.50 dB
PL2W    17.82643890 W
PL12W   0.40092635 W
PL13W   0.34758785 W
SFO2    400.1516006 MHz
SI       32768
SF       100.6177798 MHz
WDW      EM
SSB      0
LB       1.00 Hz
GB       0
PC       1.40
    
```

2,6-di-tert-butyl-4-(2'-methyl-2-(thiophen-3-yl)spiro[chromane-3,3'-indol]-4-yl)phenol (3u)

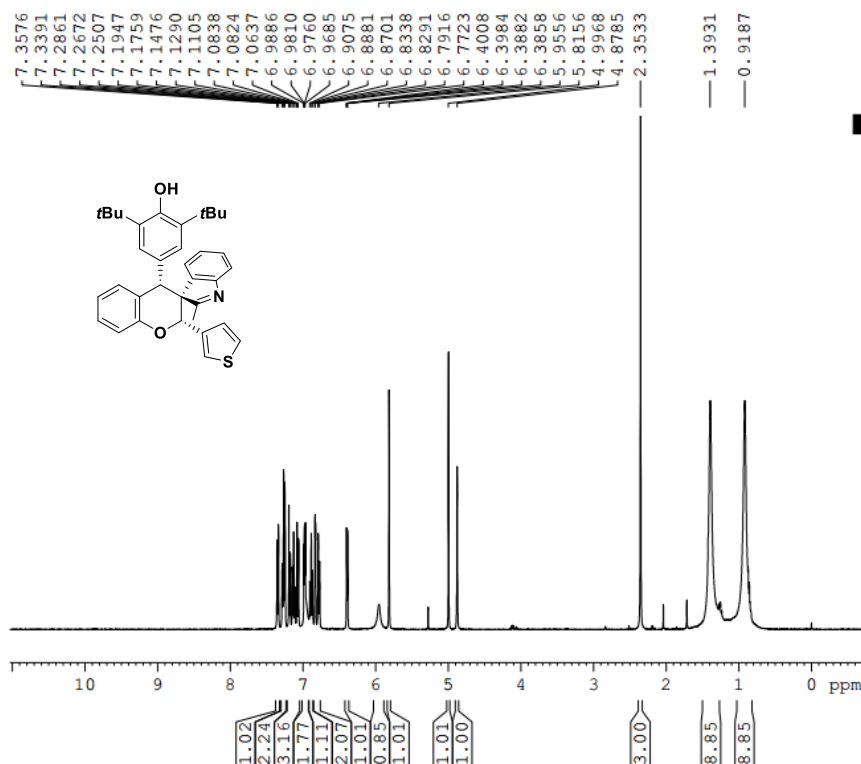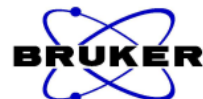

```

NAME      xqm18-3saifen-2
EXPNO     1
PROCNO    1
Date_     20180306
Time      20.27
INSTRUM   spect
PROBHD    5 mm PABBO BB-
PULPROG   zg30
TD         65536
SOLVENT   CDCl3
NS         8
DS         2
SWH        8223.685 Hz
FIDRES     0.125483 Hz
AQ         3.9846387 sec
RG         203
DW         60.800 usec
DE         6.50 usec
TE         294.7 K
D1         1.00000000 sec
TDO        1
    
```

```

===== CHANNEL f1 =====
NUC1      1H
P1         13.00 usec
PL1        -2.60 dB
PL1W      17.82643890 W
SFO1      400.1524711 MHz
SI         32768
SF         400.1500123 MHz
WDW        EM
SSB        0
LB         0.30 Hz
GB         0
PC         1.00
    
```

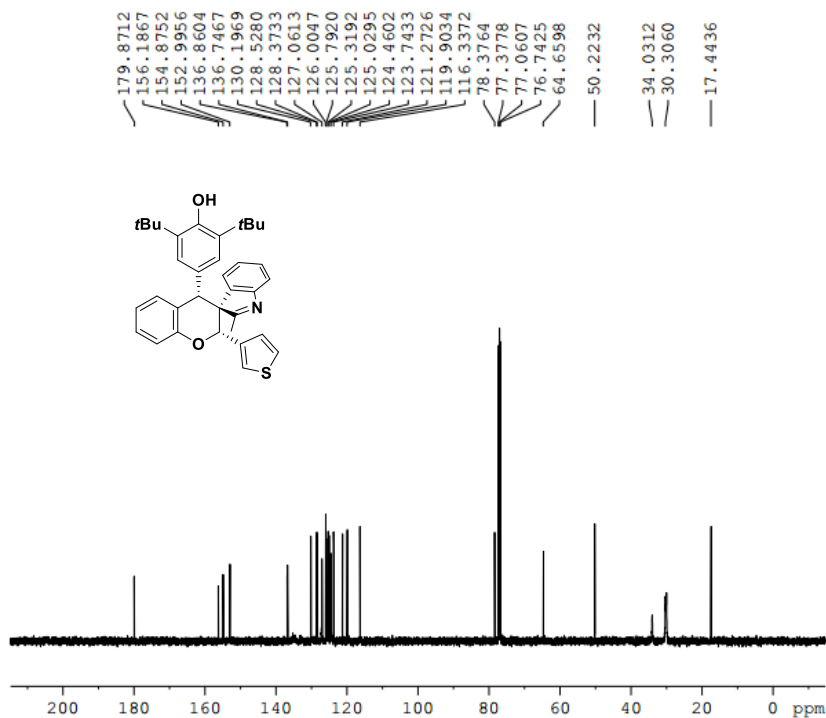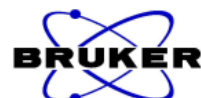

```

NAME      xqm18-3saifen-2-c
EXPNO     1
PROCNO    1
Date_     20180306
Time      20.50
INSTRUM   spect
PROBHD    5 mm PABBO BB-
PULPROG   zgpg30
TD         65536
SOLVENT   CDCl3
NS         94
DS         4
SWH        24039.461 Hz
FIDRES     0.366798 Hz
AQ         1.3631988 sec
RG         203
DW         20.800 usec
DE         6.50 usec
TE         295.7 K
D1         2.00000000 sec
D11        0.03000000 sec
TDO        1
    
```

```

===== CHANNEL f1 =====
NUC1      13C
P1         11.50 usec
PL1        -3.00 dB
PL1W      68.16146088 W
SFO1      100.6278593 MHz

===== CHANNEL f2 =====
CPDPRG2   waltz16
NUC2      1H
PCPD2     90.00 usec
PL2        -2.60 dB
PL12      13.88 dB
PL13      14.50 dB
PL2W      17.82643890 W
PL12W     0.40092635 W
PL13W     0.34758785 W
SFO2      400.1516006 MHz
SI         32768
SF         100.6177980 MHz
WDW        EM
SSB        0
LB         1.00 Hz
GB         0
PC         1.40
    
```

2,6-di-tert-butyl-4-(2'-methyl-2-(pyridin-3-yl)spiro[chromane-3,3'-indol]-4-yl)phenol (3v)

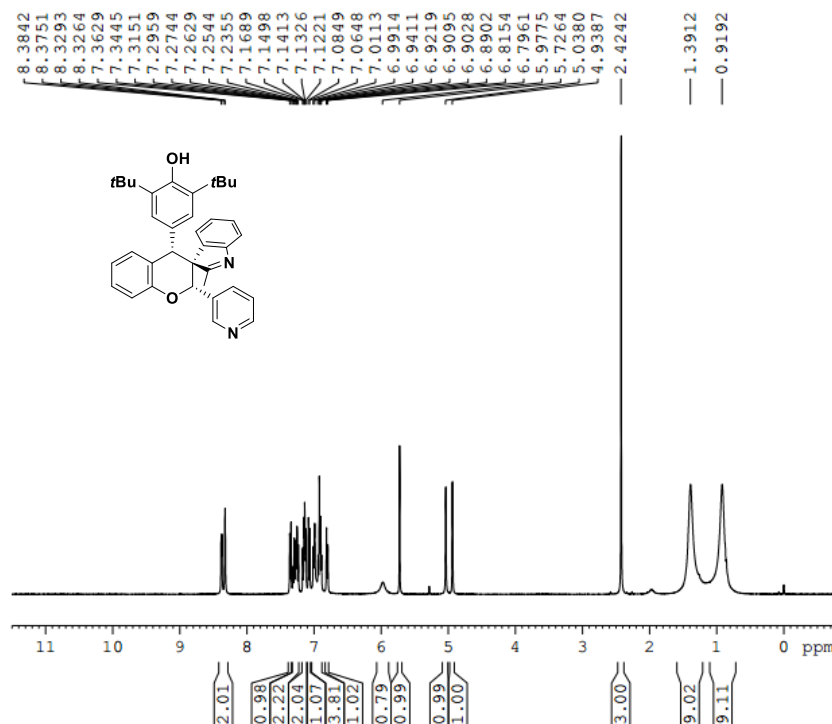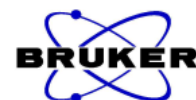

```

NAME      xqm18-3biding-1-h
EXPNO    1
PROCNO    1
Date_    20180315
Time     15.24
INSTRUM   spect
PROBHD    5 mm PABBO BB-
PULPROG   zg30
TD        65536
SOLVENT   CDCl3
NS         8
DS         2
SWH        8223.695 Hz
FIDRES     0.125483 Hz
AQ         3.9846387 sec
RG         203
DW         60.800 usec
DE         6.50 usec
TE         296.6 K
D1         1.00000000 sec
D10       1
  
```

```

===== CHANNEL f1 =====
NUC1      1H
P1        13.00 usec
PL1       -2.60 dB
PL1W      17.82643890 W
SFO1      400.1524711 MHz
SI        32768
SF        400.1500076 MHz
WDW       EM
SSB       0
LB        0.30 Hz
GB        0
PC        1.00
  
```

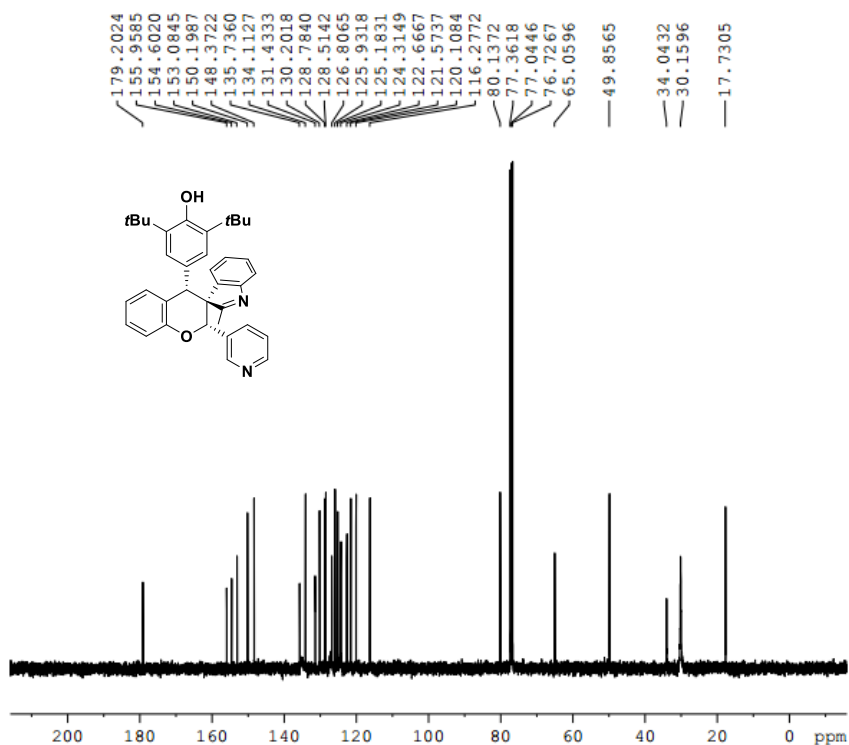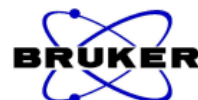

```

NAME      xqm18-3biding-1-c
EXPNO    1
PROCNO    1
Date_    20180315
Time     16.10
INSTRUM   spect
PROBHD    5 mm PABBO BB-
PULPROG   zgpg30
TD        65536
SOLVENT   CDCl3
NS        153
DS         4
SWH       24038.461 Hz
FIDRES    0.366798 Hz
AQ        1.3631988 sec
RG         203
DW        20.800 usec
DE         6.50 usec
TE         297.9 K
D1         2.00000000 sec
D11        0.03000000 sec
D10       1
  
```

```

===== CHANNEL f1 =====
NUC1      13C
P1        11.50 usec
PL1       -3.00 dB
PL1W      68.16146988 W
SFO1      100.6278593 MHz
  
```

```

===== CHANNEL f2 =====
PCPDG2    waltz16
NUC2      1H
PCPD2     90.00 usec
PL2       -2.60 dB
PL12      13.88 dB
PL13      14.50 dB
PL2W      17.82643890 W
PL12W     0.40092635 W
PL13W     0.34758785 W
SFO2      400.1516006 MHz
SI        32768
SF        100.6177980 MHz
WDW       EM
SSB       0
LB        1.00 Hz
GB        0
PC        1.40
  
```

2,6-di-tert-butyl-4-(2'-methyl-2-propylspiro[chromane-3,3'-indol]-4-yl)phenol  
(3w)

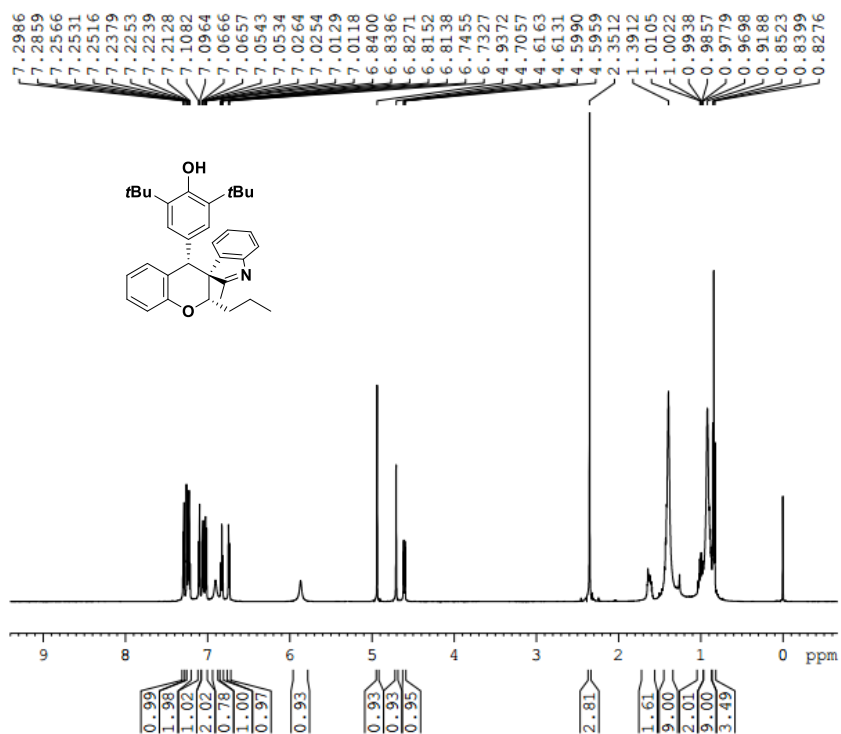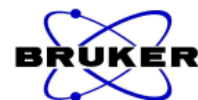

```

NAME      GQX-1H (38-48)
EXPNO     38
PROCNO    1
Date_     20170730
Time      18.24
INSTRUM   spect
PROBHD    5 mm PABBO BB/
PULPROG   zg30
TD         65536
SOLVENT   CDCl3
NS         16
DS         2
SWH        12019.230 Hz
FIDRES     0.183399 Hz
AQ         2.7263477 sec
RG         64.75
LW         41.600 usec
DE         6.50 usec
TE         300.5 K
D1         1.00000000 sec
TD0        1
===== CHANNEL f1 =====
SFO1      600.1337060 MHz
NUC1       1H
P1         12.36 usec
SI         65536
SF         600.1300178 MHz
WDW        EM
SSB        0
LB         0.30 Hz
GB         0
PC         1.00
    
```

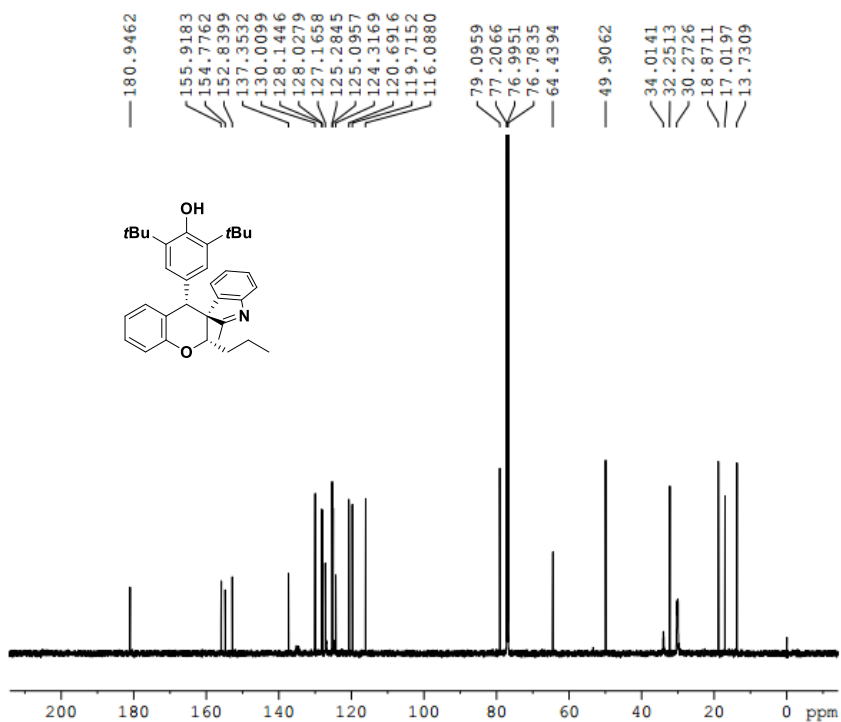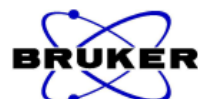

```

NAME      GQX-13C (38-48)
EXPNO     38
PROCNO    1
Date_     20170730
Time      19.16
INSTRUM   spect
PROBHD    5 mm PABBO BB/
PULPROG   zgpg30
TD         65536
SOLVENT   CDCl3
NS         1024
DS         4
SWH        36057.691 Hz
FIDRES     0.550197 Hz
AQ         0.9088159 sec
RG         188.59
LW         13.867 usec
DE         6.50 usec
TE         302.7 K
D1         2.00000000 sec
D11        0.03000000 sec
TD0        1
===== CHANNEL f1 =====
SFO1      150.9178981 MHz
NUC1       13C
P1         13.76 usec
SI         32768
SF         150.9028090 MHz
WDW        EM
SSB        0
LB         1.00 Hz
GB         0
PC         1.40
    
```

2,6-di-tert-butyl-4-(2-isopropyl-2'-methylspiro[chromane-3,3'-indol]-4-yl)phenol  
(3x)

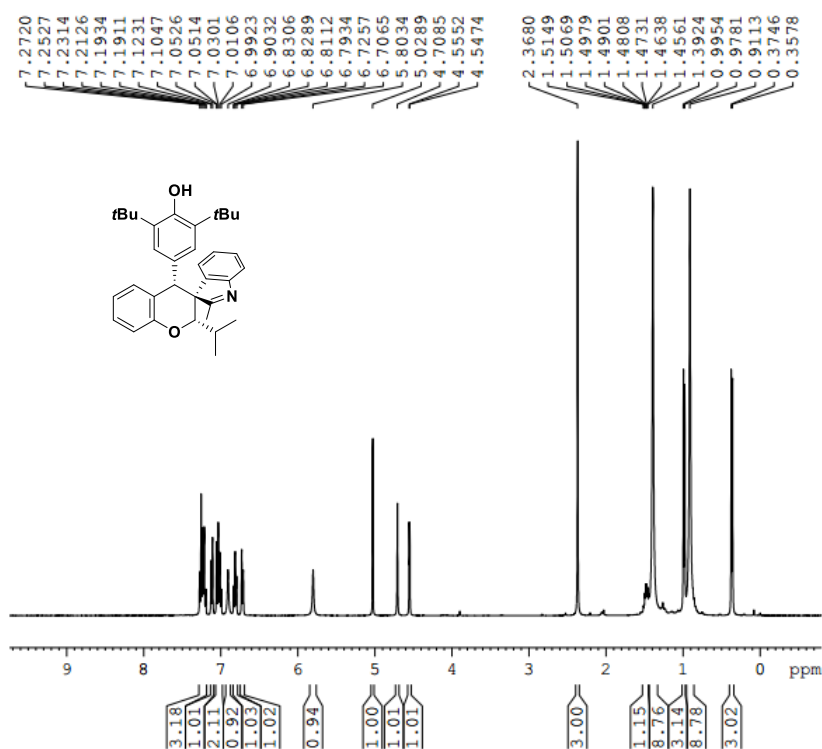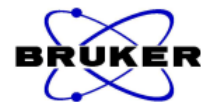

```

NAME      xqm180104-1-HH
EXPNO     1
PROCNO    1
Date_     20180315
Time      15.29
INSTRUM   spect
PROBHD    5 mm FAPBO BB-
PULPROG   zg30
TD         65536
SOLVENT   CDCl3
NS         8
DS         2
SWH        8223.685 Hz
FIDRES     0.125483 Hz
AQ         3.9846387 sec
RG         64
DW         60.800 usec
DE         6.50 usec
TE         296.6 K
D1         1.00000000 sec
TD0        1

===== CHANNEL f1 =====
NUC1       1H
P1         13.00 usec
PL1        -2.60 dB
PL1W       17.82643890 W
SFO1       400.1524711 MHz
SI         32768
SF         400.1500122 MHz
WDW        EM
SSB        0
LB         0.30 Hz
GB         0
PC         1.00
    
```

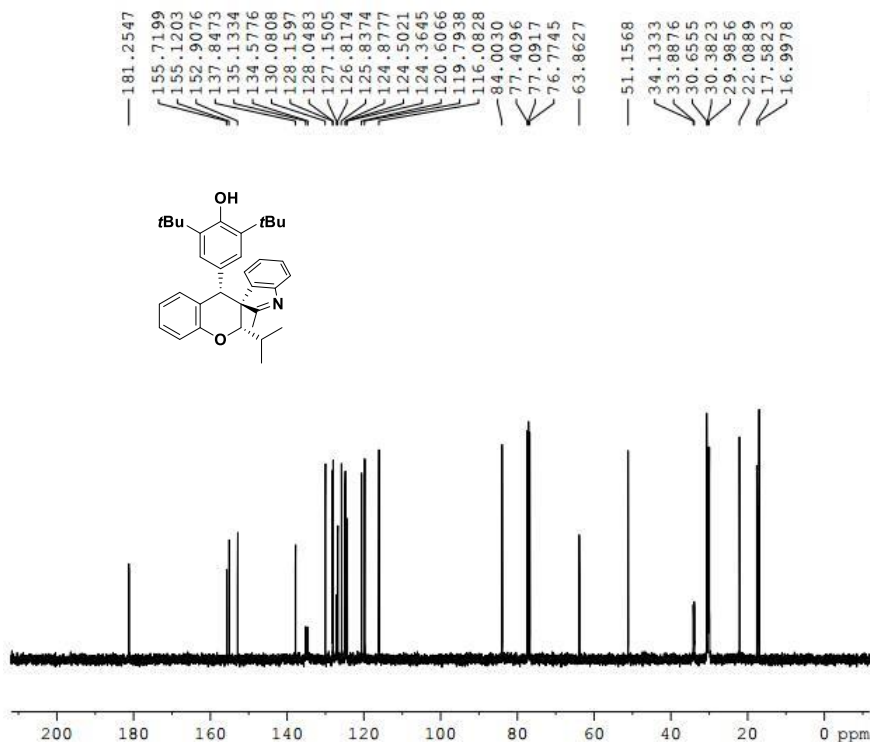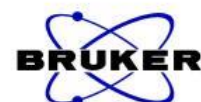

```

NAME      xqm180104-1-cc
EXPNO     1
PROCNO    1
Date_     20180315
Time      15.00
INSTRUM   spect
PROBHD    5 mm FAPBO BB-
PULPROG   zgpg30
TD         65536
SOLVENT   CDCl3
NS         38
DS         4
SWH        24038.461 Hz
FIDRES     0.366798 Hz
AQ         1.3631988 sec
RG         203
DW         20.800 usec
DE         6.50 usec
TE         297.3 K
D1         2.00000000 sec
D11        0.03000000 sec
TD0        1

===== CHANNEL f1 =====
NUC1       13C
P1         11.50 usec
PL1        -3.00 dB
PL1W       68.16146088 W
SFO1       100.6278153 MHz

===== CHANNEL f2 =====
CPDPRG2   waltz16
NUC2       13C
FCPD2     90.00 usec
PL2        -2.60 dB
PL12      13.88 dB
PL13      14.50 dB
PL2W      17.82643890 W
PL12W     0.40092635 W
PL13W     0.34758785 W
SFO2       400.1516006 MHz
SI         32768
SF         100.6177980 MHz
WDW        EM
SSB        0
LB         1.00 Hz
GB         0
PC         1.40
    
```

2,6-di-tert-butyl-4-(5'-methoxy-2'-methyl-2-phenylspiro[chromane-3,3'-indol]-4-yl)phenol (3y)

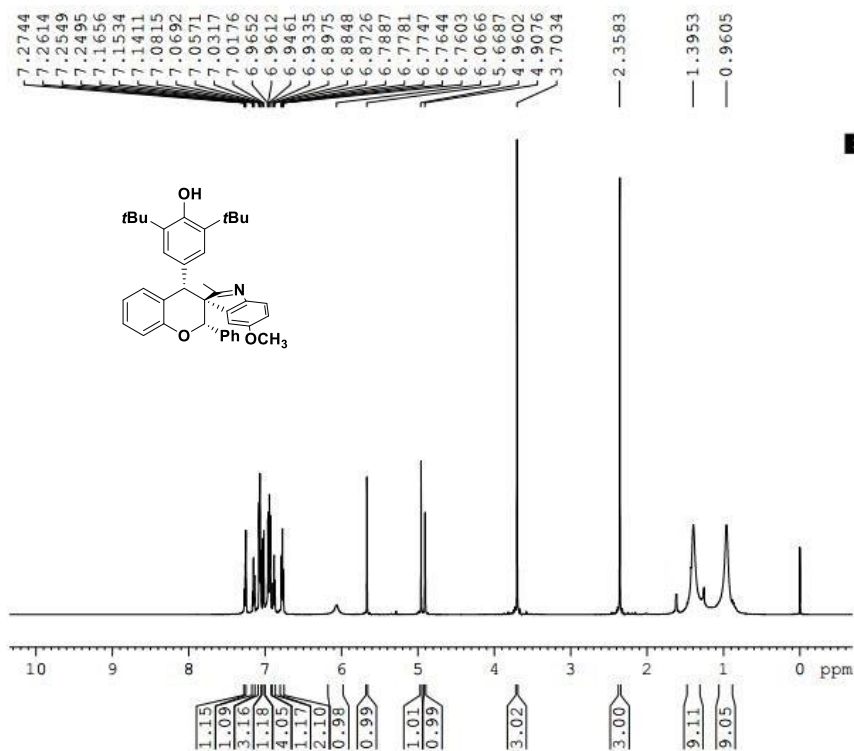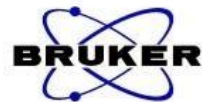

```

NAME          XQM-H
EXPNO         2
PROCNO        1
Date_         20171001
Time          12.58
INSTRUM       spect
PROBHD        5 mm PABBO BB/
PULPROG       zg30
TD            65536
SOLVENT       CDCl3
NS            16
DS            2
SWH           12019.230 Hz
FIDRES        0.183399 Hz
AQ            2.7263477 sec
RG            54.75
DW            41.600 usec
DE            6.50 usec
TE            301.5 K
D1            1.00000000 sec
TDD           1

===== CHANNEL f1 =====
SFO1          600.1337060 MHz
NUC1           1H
P1            12.36 usec
SI            65536
SF            600.1300189 MHz
WDW           EM
SSB           0
LB            0.30 Hz
GB            0
PC            1.00
    
```

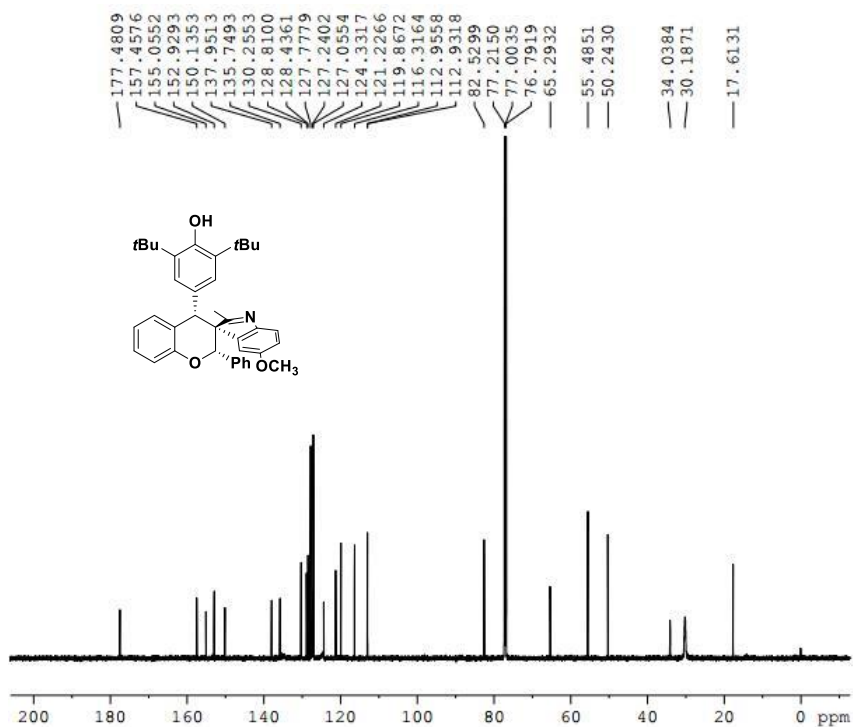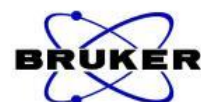

```

NAME          XQM-C
EXPNO         1
PROCNO        1
Date_         20171001
Time          13.50
INSTRUM       spect
PROBHD        5 mm PABBO BB/
PULPROG       zgpg30
TD            65536
SOLVENT       CDCl3
NS            1024
DS            4
SWH           36057.691 Hz
FIDRES        0.550197 Hz
AQ            0.9088159 sec
RG            188.59
DW            13.867 usec
DE            6.50 usec
TE            302.8 K
D1            2.00000000 sec
D11           0.03000000 sec
TDD           1

===== CHANNEL f1 =====
SFO1          150.9178981 MHz
NUC1           13C
P1            13.76 usec
SI            32768
SF            150.9028090 MHz
WDW           EM
SSB           0
LB            1.00 Hz
GB            0
PC            1.40
    
```



2,6-di-tert-butyl-4-(5'-chloro-2'-methyl-2-phenylspiro[chromane-3,3'-indol]-4-yl)phenol (3z)

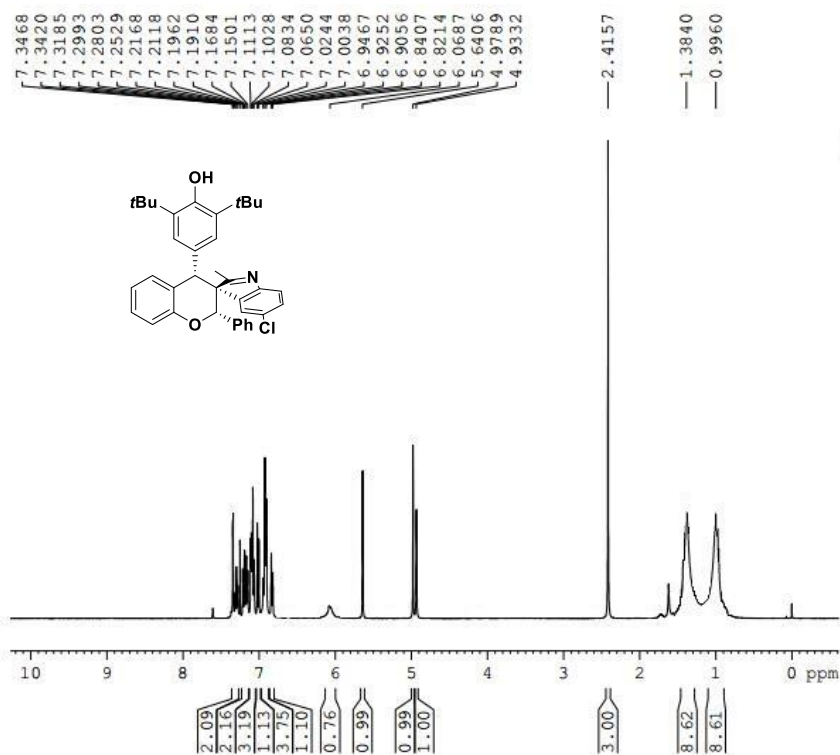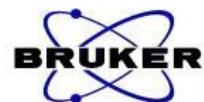

```

NAME      xqm-5-cl-1
EXPNO    2
PROCNO   1
Date_    20180510
Time     20.10
INSTRUM  spect
PROBHD   5 mm F400 BB-
PULPROG  zg30
TD       65536
SOLVENT  CDCl3
NS       8
DS       2
SWH      8223.685 Hz
FIDRES   0.125483 Hz
AQ       3.9846387 sec
RG       101
DW       60.800 usec
DE       6.50 usec
TE       298.7 K
D1       1.00000000 sec
TD0      1

===== CHANNEL f1 =====
NUC1     1H
P1       13.00 usec
PL1     -2.60 dB
PL1W    17.82643890 W
SFO1    400.1524711 MHz
SI       32768
SF       400.1500117 MHz
WDW      EM
SSB      0
LB       0.30 Hz
GB       0
PC       1.00
    
```

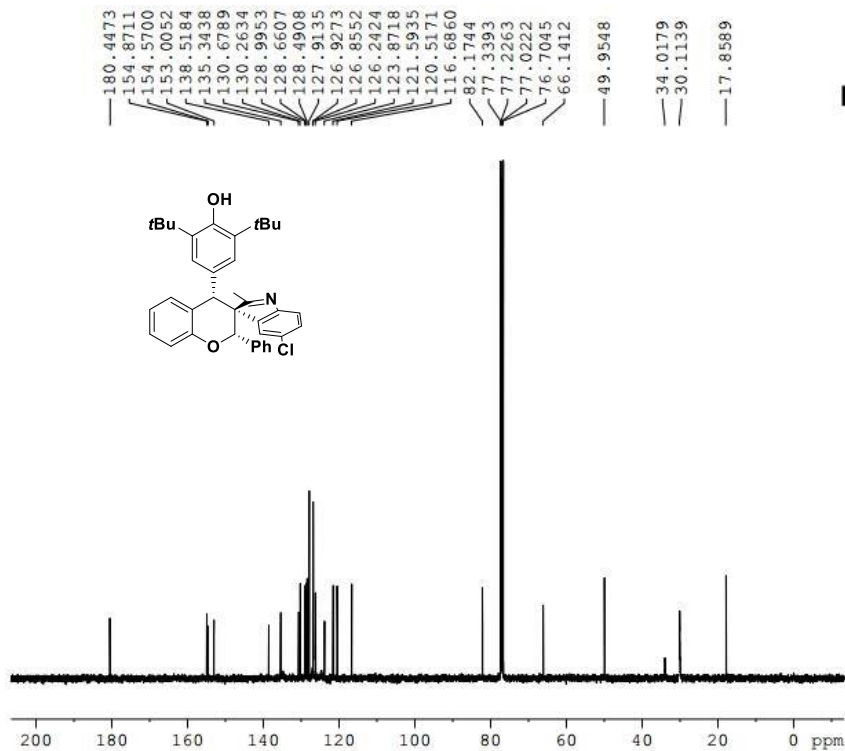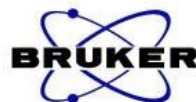

```

NAME      xqm-5-cl-1-C-1
EXPNO    2
PROCNO   1
Date_    20180510
Time     20.36
INSTRUM  spect
PROBHD   5 mm F400 BB-
PULPROG  zgpg30
TD       65536
SOLVENT  CDCl3
NS       4
DS       4
SWH      24038.461 Hz
FIDRES   0.366798 Hz
AQ       1.3631988 sec
RG       203
DW       20.800 usec
DE       6.50 usec
TE       300.0 K
D1       2.00000000 sec
D11      0.03000000 sec
TD0      1

===== CHANNEL f1 =====
NUC1     13C
P1       11.50 usec
PL1     -3.00 dB
PL1W    58.16146088 W
SFO1    100.6278593 MHz

===== CHANNEL f2 =====
CPDPRG2  waltz16
NUC2     1H
PCPD2    90.00 usec
PL2     -6.60 dB
PL12    13.88 dB
PL13    14.50 dB
PL1W    17.82643890 W
PL12W   0.40092635 W
PL13W   0.34758785 W
SFO2    400.1516006 MHz
SI       32768
SF       100.6177980 MHz
WDW      EM
SSB      0
LB       1.00 Hz
GB       0
PC       1.40
    
```

2,6-di-tert-butyl-4-(2',6-dimethyl-2-phenylspiro[chromane-3,3'-indol]-4-yl)pheno  
I (4a)

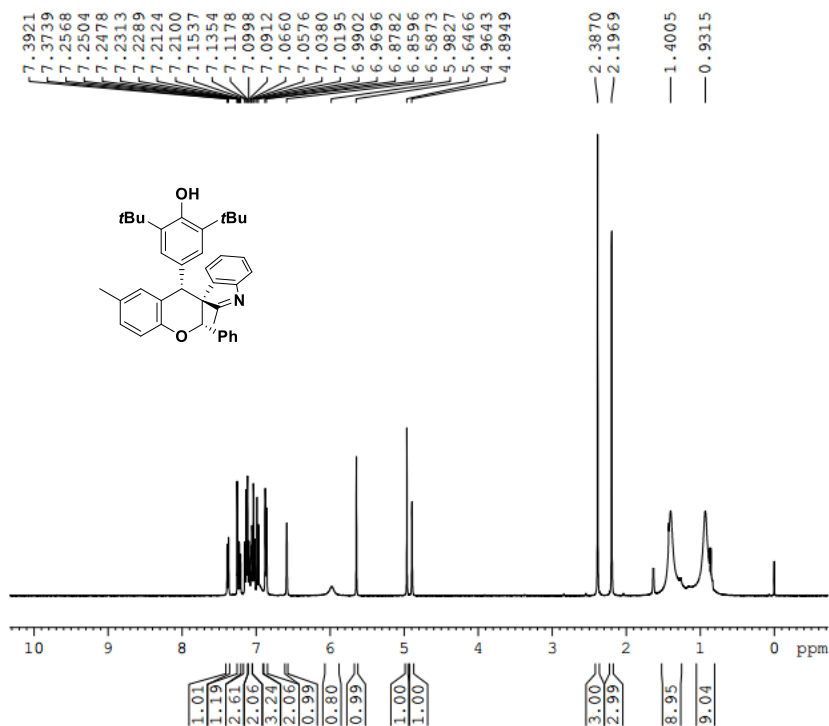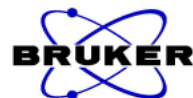

```

NAME      xqm18-5ch3-p-1
EXPNO    1
PROCNO   1
Date_    20180306
Time     20.31
INSTRUM  spect
PROBHD   5 mm PABBO BB-
PULPROG  zg30
TD        65536
SOLVENT  CDCl3
NS        8
DS        2
SWH       8223.685 Hz
FIDRES    0.125483 Hz
AQ        3.9846387 sec
RG        203
DW        60.800 usec
DE        6.50 usec
TE        294.9 K
D1        1.00000000 sec
TDO       1

===== CHANNEL f1 =====
NUC1     1H
P1       13.00 usec
PL1      -2.60 dB
PL1W     17.82643890 W
SFO1     400.1524711 MHz
SI       32768
SF       400.1500100 MHz
WDW      EM
SSB      0
GB       0.30 Hz
PC       1.00
    
```

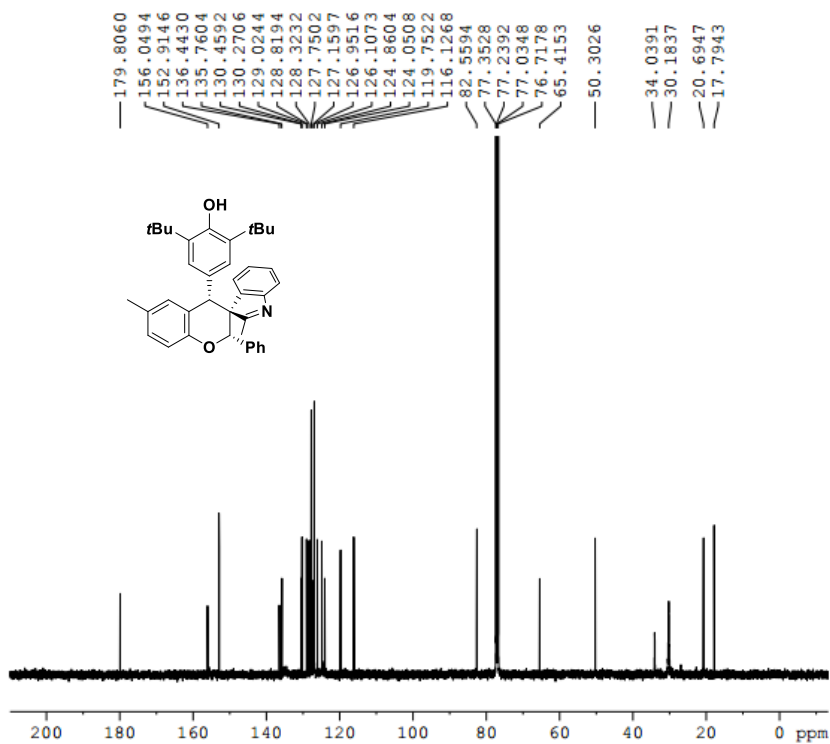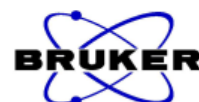

```

NAME      xqm18-5ch3-p-1-c
EXPNO    1
PROCNO   1
Date_    20180306
Time     21.35
INSTRUM  spect
PROBHD   5 mm PABBO BB-
PULPROG  zgpg30
TD        65536
SOLVENT  CDCl3
NS        751
DS        4
SWH       24038.461 Hz
FIDRES    0.366798 Hz
AQ        1.3631988 sec
RG        203
DW        20.800 usec
DE        6.50 usec
TE        296.0 K
D1        2.00000000 sec
D11       0.03000000 sec
TDO       1

===== CHANNEL f1 =====
NUC1     13C
P1       11.50 usec
PL1      -3.00 dB
PL1W     68.16146088 W
SFO1     100.6276593 MHz

===== CHANNEL f2 =====
CPDPRG2  waltz16
NUC2     1H
PCPD2    90.00 usec
PL2      -2.60 dB
PL12     13.88 dB
PL13     14.50 dB
PL2W     17.82643890 W
PL12W    0.40092635 W
PL13W    0.34758785 W
SFO2     400.1516006 MHz
SI       32768
SF       100.6177980 MHz
WDW      EM
SSB      0
GB       1.00 Hz
PC       1.40
    
```

**2,6-di-tert-butyl-4-(6-methoxy-2'-methyl-2-phenylspiro[chromane-3,3'-indol]-4-y  
l)phenol (4b)**

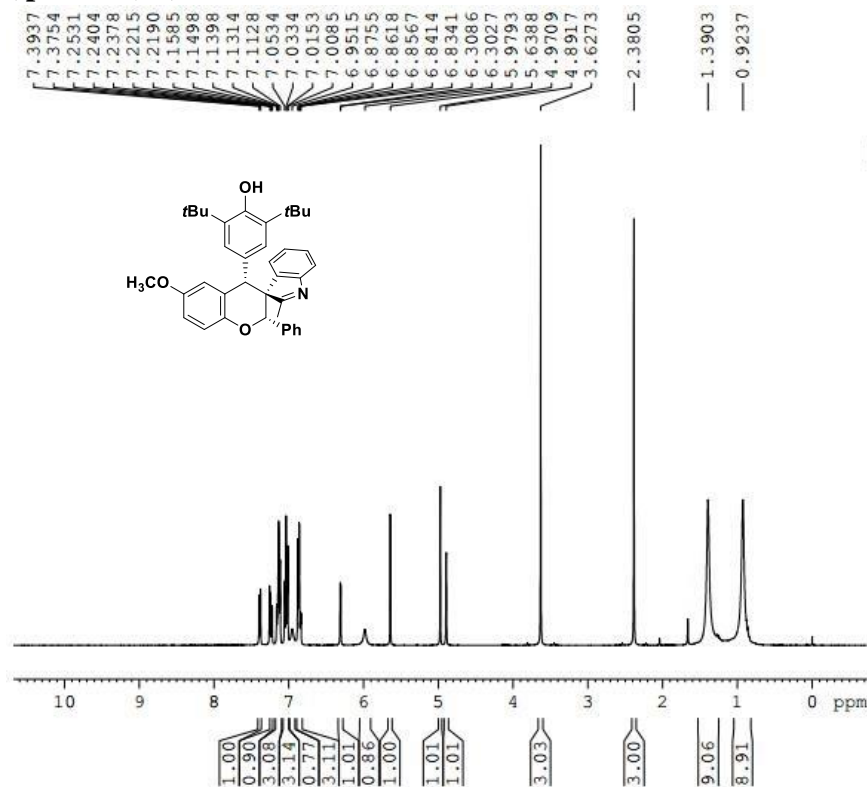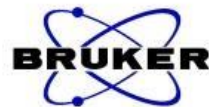

```

NAME      xqm18-5och3-p-1-h
EXPNO     1
PROCNO    1
Date_     20180331
Time      17.57
INSTRUM   spect
PROBHD    5 mm PABBO BB-
PULPROG   zg30
TD        65536
SOLVENT   CDCl3
NS        8
DS        2
SWH       8223.685 Hz
FIDRES    0.125483 Hz
AQ        3.9846387 sec
RG        203
DW        60.800 usec
DE        6.50 usec
TE        298.2 K
D1        1.00000000 sec
TD0       1

===== CHANNEL f1 =====
NUC1      1H
P1        13.00 usec
PL1       -2.60 dB
PL1W      17.82643890 W
SFO1      400.1524711 MHz
SI        32768
SF        400.1500118 MHz
WDW       EM
SSB       0
LB        0.30 Hz
GB        0
PC        1.00
    
```

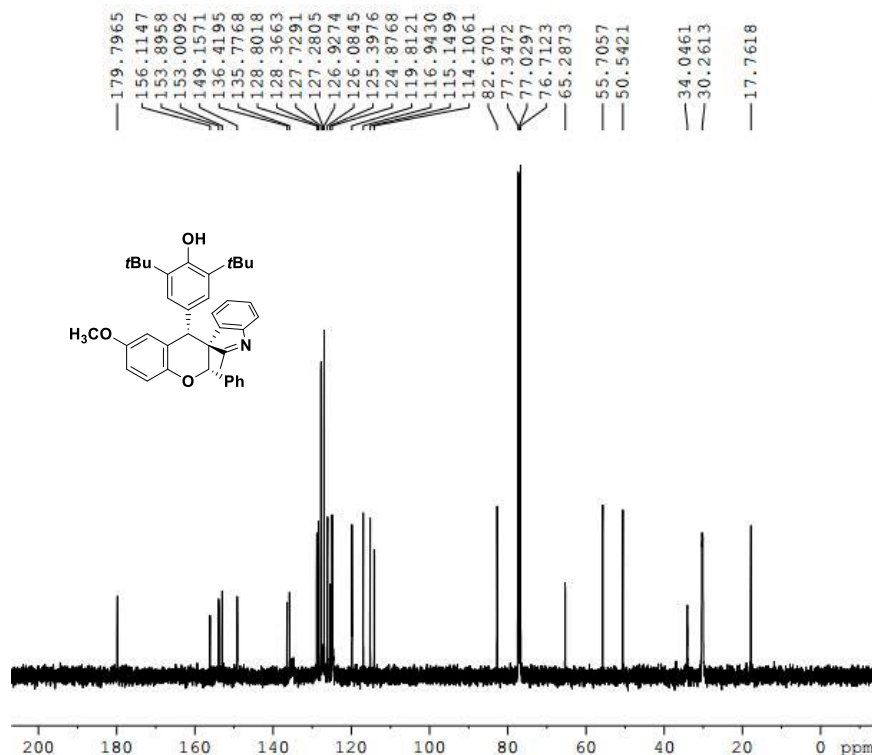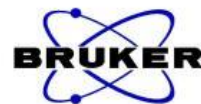

```

NAME      xqm18-5och3-p-1-c
EXPNO     1
PROCNO    1
Date_     20180331
Time      18.33
INSTRUM   spect
PROBHD    5 mm PABBO BB-
PULPROG   zgpg30
TD        65536
SOLVENT   CDCl3
NS        271
DS        4
SWH       24038.461 Hz
FIDRES    0.366798 Hz
AQ        1.3631988 sec
RG        203
DW        20.800 usec
DE        6.50 usec
TE        299.5 K
D1        2.00000000 sec
D11       0.03000000 sec
TD0       1

===== CHANNEL f1 =====
NUC1      13C
P1        11.50 usec
PL1       -3.00 dB
PL1W      68.16146088 W
SFO1      100.6278593 MHz

===== CHANNEL f2 =====
CPDPRG2   waltz16
NUC2      1H
PCPD2     90.00 usec
PL2       -2.60 dB
PL12      13.88 dB
PL13      14.50 dB
PL2W      17.82643890 W
PL12W     0.40092635 W
PL13W     0.34758785 W
SFO2      400.1516006 MHz
SI        32768
SF        100.6177980 MHz
WDW       EM
SSB       0
LB        1.00 Hz
GB        0
PC        1.40
    
```

2,6-di-tert-butyl-4-(6-chloro-2'-methyl-2-phenylspiro[chromane-3,3'-indol]-4-yl)phenol (4c)

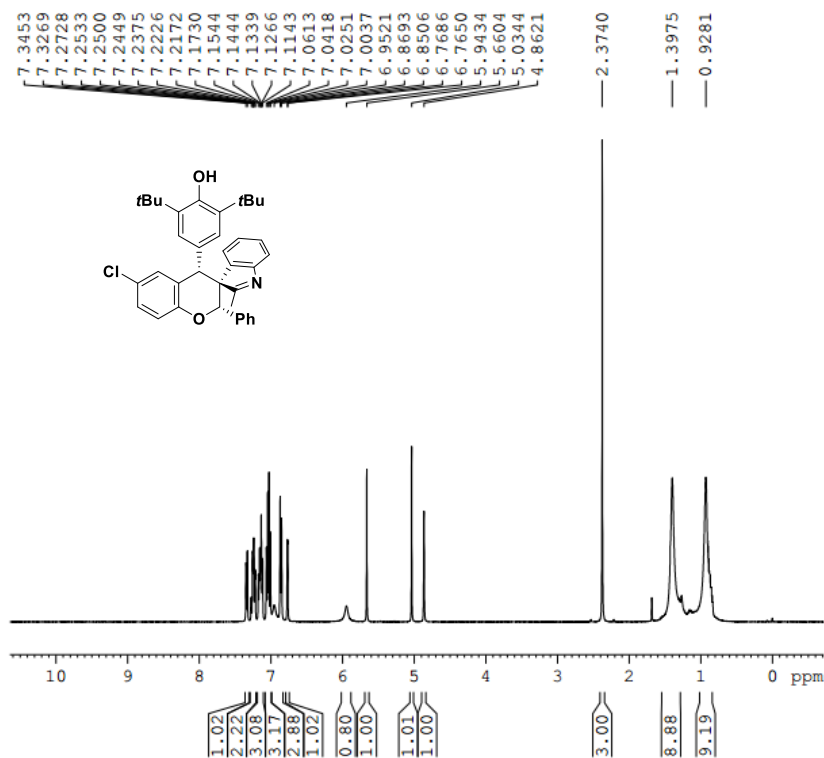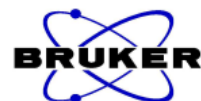

```

NAME      xqm18-5cl-p-1-H
EXPNO    1
PROCNO   1
Date_    20180309
Time     16.24
INSTRUM  spect
PROBHD   5 mm PABBO BB-
PULPROG  zg30
TD       65536
SOLVENT  CDCl3
NS       8
DS       2
SWH      8223.685 Hz
FIDRES   0.125483 Hz
AQ       3.9846387 sec
RG       203
DW       60.800 usec
DE       6.50 usec
TE       295.8 K
D1       1.00000000 sec
TD0      1

===== CHANNEL f1 =====
NUC1     1H
P1       13.00 usec
PL1      -2.60 dB
PL1W    17.82643890 W
SFO1    400.1524711 MHz
SI       32768
SF       400.1500129 MHz
WDW      EM
SSB      0
LB       0.30 Hz
GB       0
PC       1.00
    
```

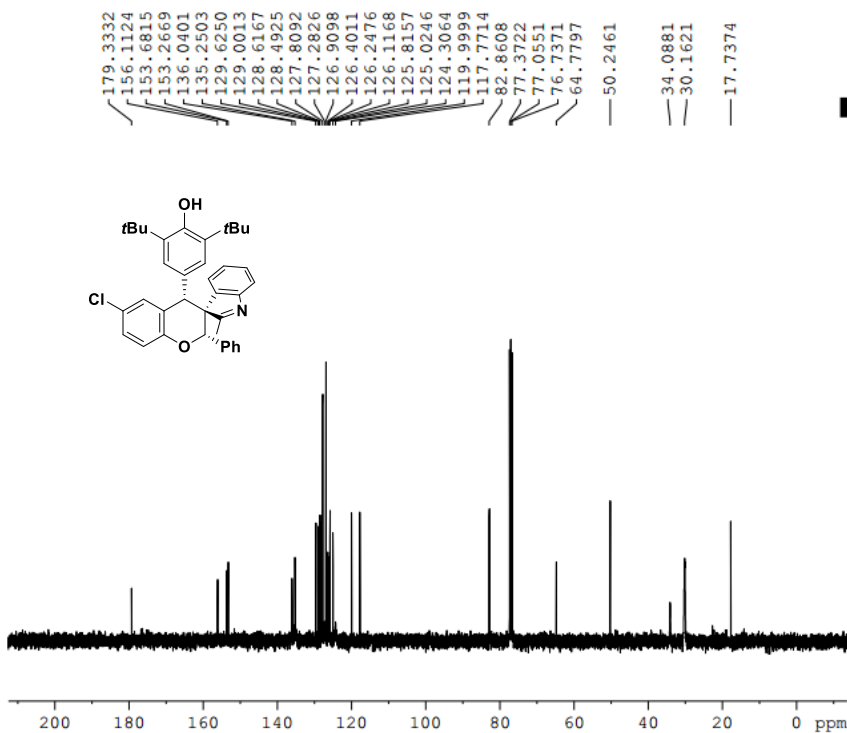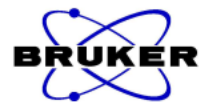

```

NAME      xqm18-5cl-p-1-C
EXPNO    1
PROCNO   1
Date_    20180309
Time     17.22
INSTRUM  spect
PROBHD   5 mm PABBO BB-
PULPROG  zgpg30
TD       65536
SOLVENT  CDCl3
NS       54
DS       4
SWH      24038.461 Hz
FIDRES   0.366798 Hz
AQ       1.3631988 sec
RG       203
DW       20.800 usec
DE       6.50 usec
TE       296.8 K
D1       2.00000000 sec
D11      0.03000000 sec
TD0      1

===== CHANNEL f1 =====
NUC1     13C
P1       11.50 usec
PL1      -3.00 dB
PL1W    68.16146088 W
SFO1    100.6278593 MHz

===== CHANNEL f2 =====
CPDPRG2  waltz16
NUC2     1H
PCPD2    90.00 usec
PL2      -2.60 dB
PL12     13.88 dB
PL13     14.50 dB
PL2W    17.82643890 W
PL12W   0.40092635 W
PL13W   0.34758785 W
SFO2    400.1516006 MHz
SI       32768
SF       100.6177980 MHz
WDW      EM
SSB      0
LB       1.00 Hz
GB       0
PC       1.40
    
```

4-(6-bromo-2'-methyl-2-phenylspiro[chromane-3,3'-indol]-4-yl)-2,6-di-tert-butyl phenol (4d)

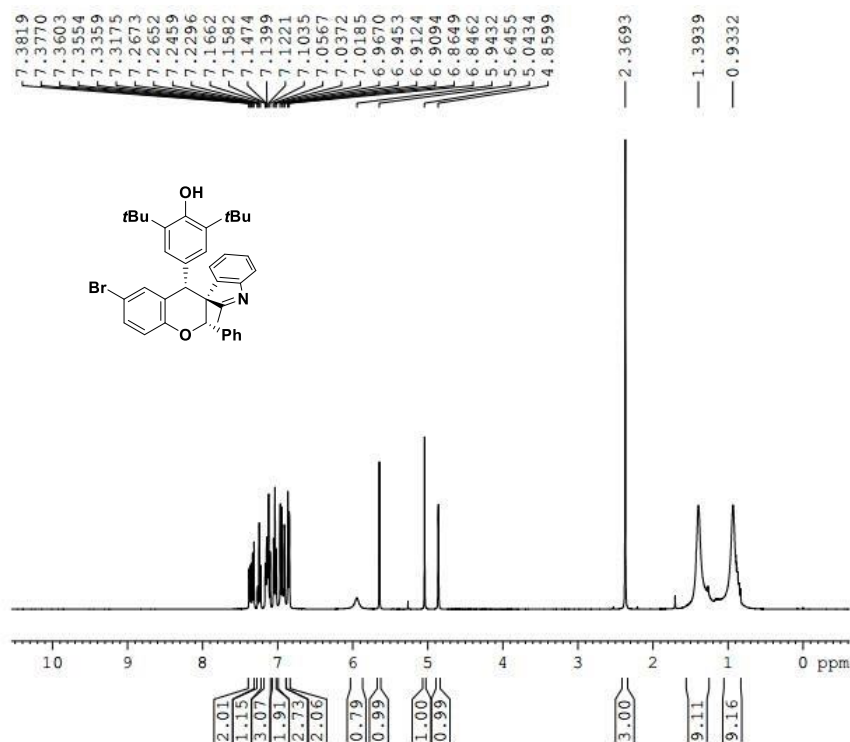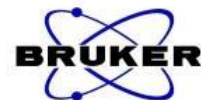

```

NAME      xqm18-5Br-p-1-H
EXPNO     1
PROCNO    1
Date_     20180330
Time      15.01
INSTRUM   spect
PROBHD    5 mm PABBO B
FULPROG   zg30
TD         65536
SOLVENT   CDCl3
NS         8
DS         2
SWH       8223.685 Hz
FIDRES    0.125483 Hz
AQ        3.9846387 sec
RG         114
DW         60.800 usec
DE         6.50 usec
TE         297.6 K
D1         1.00000000 sec
TDD        1

===== CHANNEL f1 =====
NUC1      1H
P1        13.00 usec
PL1       -2.60 dB
PL1W     17.82643890 W
SFO1     400.1524711 MHz
SI        32768
SF        400.1500145 MHz
WDW       EM
SSB        0
LB         0.30 Hz
GB         0
PC         1.00
    
```

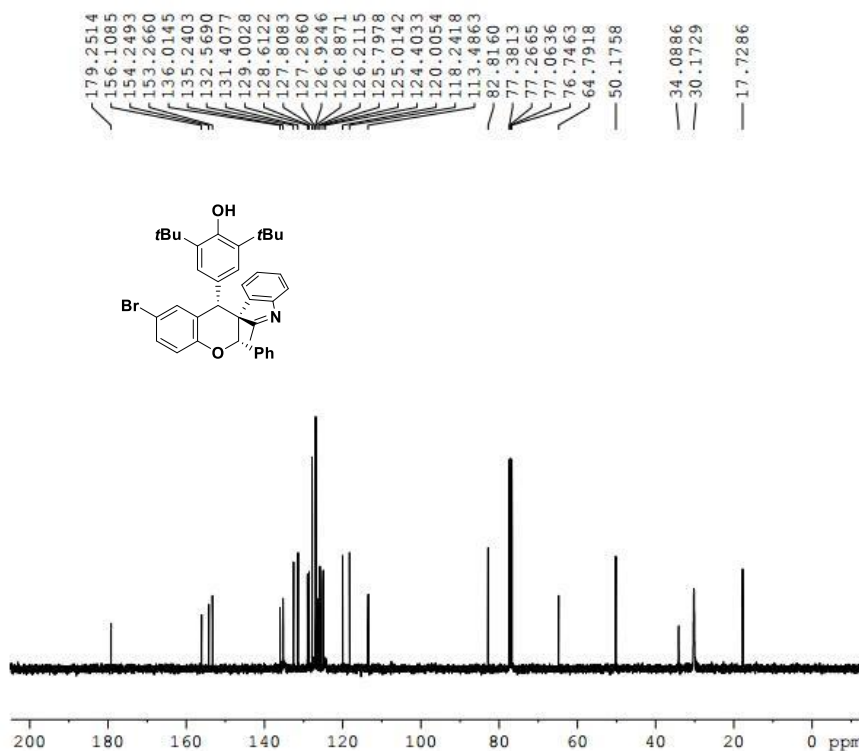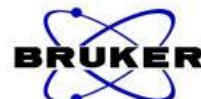

```

NAME      xqm18-5Br-p-1-Cc
EXPNO     1
PROCNO    1
Date_     20180330
Time      16.43
INSTRUM   spect
PROBHD    5 mm PABBO B
FULPROG   zgpg30
TD         65536
SOLVENT   CDCl3
NS         71
DS         4
SWH       24038.461 Hz
FIDRES    0.366798 Hz
AQ        1.3631988 sec
RG         203
DW         20.800 usec
DE         6.50 usec
TE         298.8 K
D1         2.00000000 sec
D11        0.03000000 sec
TDO        1

===== CHANNEL f1 =====
NUC1      13C
P1        11.50 usec
PL1       -3.00 dB
PL1W     68.16146088 W
SFO1     100.6278593 MHz

===== CHANNEL f2 =====
CPDPRG2   waltz16
NUC2      1H
PCFPD2    90.00 usec
FL2       -2.60 dB
PL12     13.88 dB
PL13     14.50 dB
PL2W     17.82643890 W
PL12W    0.40052635 W
PL13W    0.34758788 W
SFO2     400.1516006 MHz
SI        32768
SF        100.6177980 MHz
WDW       EM
SSB        0
LB         1.00 Hz
GB         0
PC         1.40
    
```

2,6-di-tert-butyl-4-(7-methoxy-2'-methyl-2-phenylspiro[chromane-3,3'-indol]-4-yl)phenol (4e)

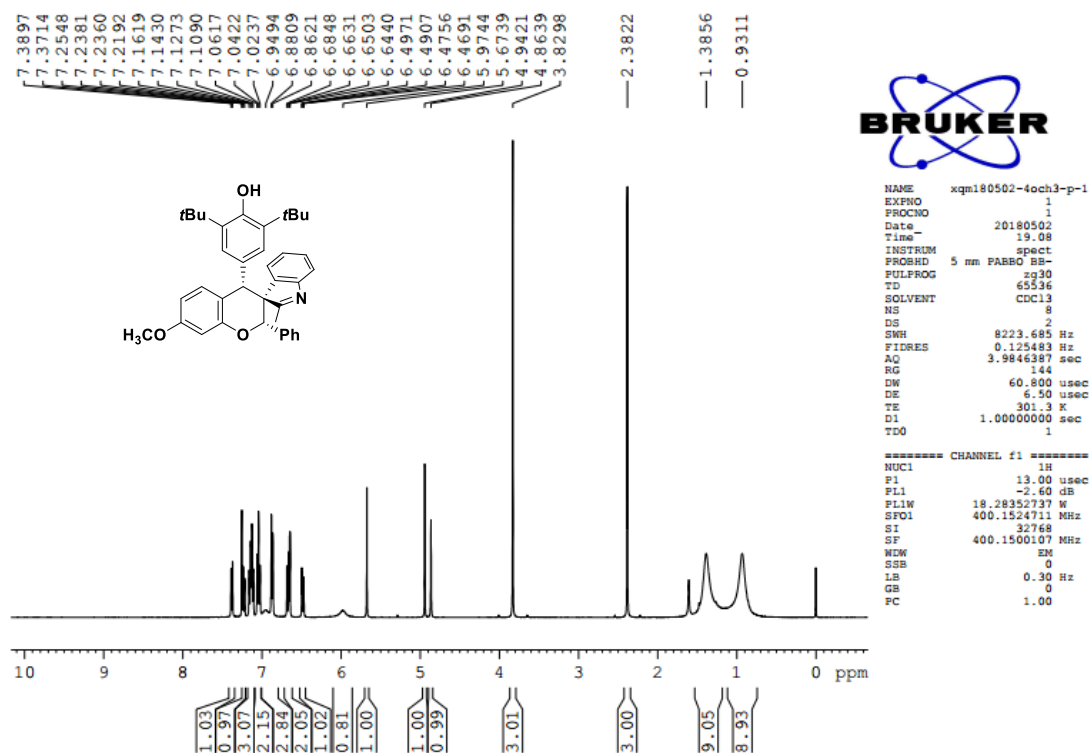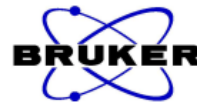

```

NAME      xqm180502-4och3-p-1
EXPNO    1
PROCNO   1
Date_    20180502
Time     19.08
INSTRUM  spect
PROBHD   5 mm FAPBO BB-
PULPROG  zg30
TD       65536
SOLVENT  cdcl3
NS       8
DS       2
SWH      8223.685 Hz
FIDRES   0.125483 Hz
AQ       3.9846387 sec
RG       144
DW       60.800 usec
DE       6.50 usec
TE       301.3 K
D1       1.00000000 sec
TD0      1

===== CHANNEL f1 =====
NUC1     1H
P1       13.00 usec
PL1      -2.60 dB
PL1W    18.28352737 W
SFO1     400.1524711 MHz
SI       32768
SF       400.1500107 MHz
WDW      EM
SSB      0
LB       0.30 Hz
GB       0
PC       1.00
    
```

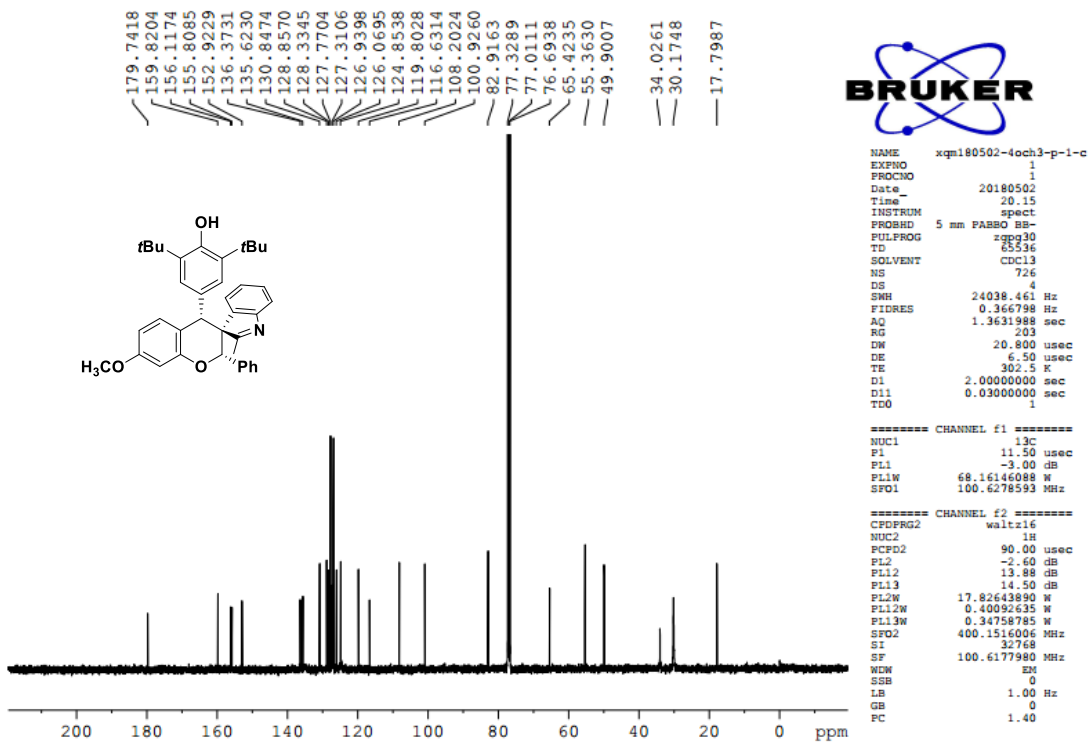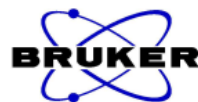

```

NAME      xqm180502-4och3-p-1-c
EXPNO    1
PROCNO   1
Date_    20180502
Time     20.15
INSTRUM  spect
PROBHD   5 mm FAPBO BB-
PULPROG  zgpg30
TD       65536
SOLVENT  cdcl3
NS       726
DS       4
SWH      24038.461 Hz
FIDRES   0.366798 Hz
AQ       1.3631988 sec
RG       203
DW       20.800 usec
DE       6.50 usec
TE       302.5 K
D1       2.00000000 sec
D11      0.03000000 sec
TD0      1

===== CHANNEL f1 =====
NUC1     13C
P1       11.50 usec
PL1      -3.00 dB
PL1W    68.16146088 W
SFO1     100.6278593 MHz

===== CHANNEL f2 =====
CPDPRG2  waltz16
NUC2     1H
PCPD2    90.00 usec
PL2      -2.60 dB
PL12     13.88 dB
PL13     14.50 dB
PL12W   17.82643890 W
PL12W   0.40092635 W
PL13W   0.34758785 W
SFO2     400.1516006 MHz
SI       32768
SF       100.6177980 MHz
WDW      EM
SSB      0
LB       1.00 Hz
GB       0
PC       1.40
    
```

2,6-di-tert-butyl-4-(2',7-dimethyl-2-phenylspiro[chromane-3',3'-indol]-4-yl)pheno  
I (4f)

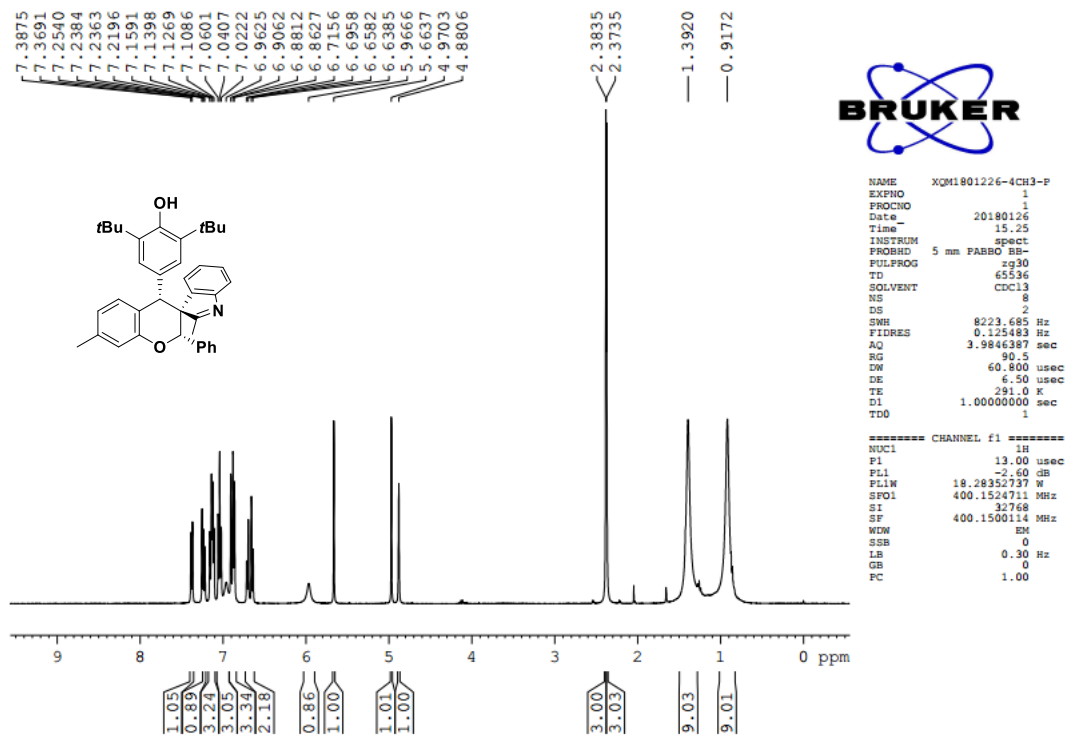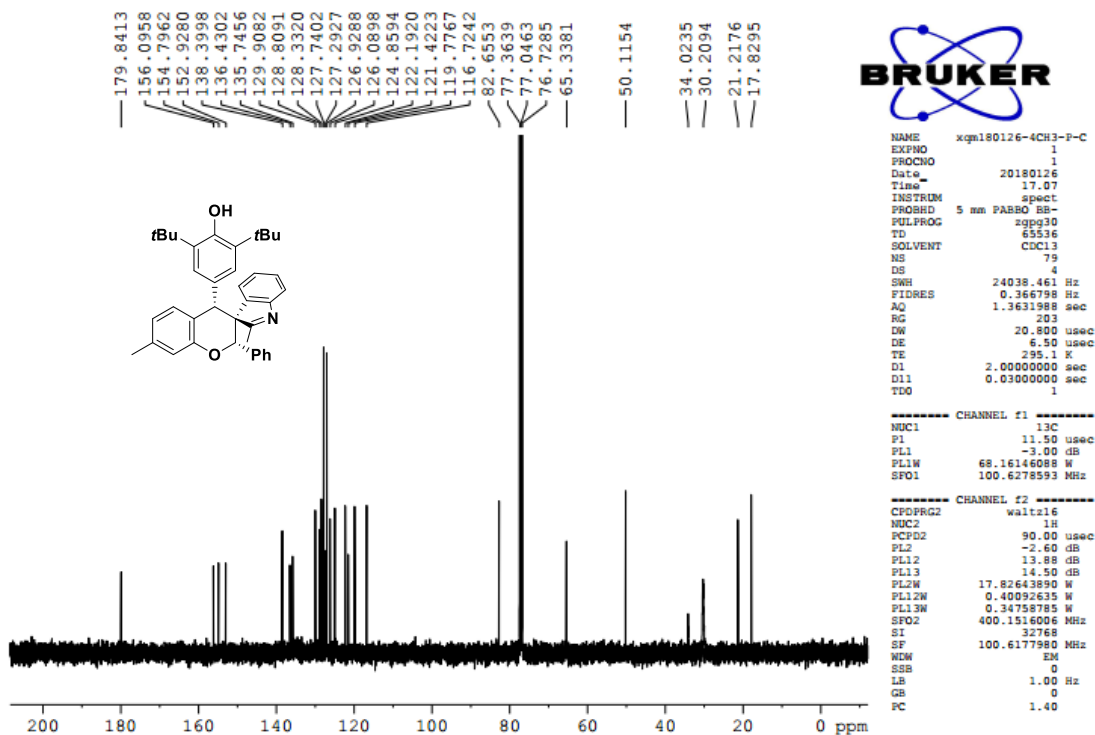

Supplement: d2nj00936f1.pdf [file d2nj00936f1.pdf]
